# Supplementary material
Source: PubMed Central journal article supplement (PMC164685)
Supplement: pnas_1332093100_2.pdf [file pnas_1332093100_2.pdf]

**Table 2. *Helicobacter hepaticus* predicted open frames and their functional annotation**

| ORF number | Start | End   | Length (AA) | Strand | Gene name   | Functional annotation                                                                                                      |
|------------|-------|-------|-------------|--------|-------------|----------------------------------------------------------------------------------------------------------------------------|
| HH0001     | 141   | 2420  | 760         | +      |             | Conserved hypothetical protein, similar to <i>Helicobacter pylori</i> toxin-like outer membrane protein                    |
| HH0002     | 2484  | 3986  | 501         | +      | <i>trpC</i> | Phosphoribosylanthranilate isomerase                                                                                       |
| HH0003     | 3986  | 5029  | 348         | +      |             | Conserved hypothetical protein, similar to <i>Streptomyces coelicolor</i> putative lipoprotein                             |
| HH0004     | 5056  | 5607  | 184         | -      |             | Hypothetical protein, similar to GGDEF family protein                                                                      |
| HH0005     | 5636  | 6196  | 187         | -      |             | Conserved hypothetical protein, similar to <i>Campylobacter jejuni</i> putative iron-binding protein, GGDEF family protein |
| HH0006     | 6285  | 6905  | 207         | -      | <i>rnhB</i> | Ribonuclease HII                                                                                                           |
| HH0007     | 7076  | 7681  | 202         | -      | <i>hopZ</i> | Conserved hypothetical protein, similar to <i>H. pylori</i> Hop-family proteins                                            |
| HH0008     | 7848  | 8888  | 347         | -      |             | Conserved hypothetical protein, similar to <i>C. jejuni</i> putative GTP-binding protein                                   |
| HH0009     | 9019  | 9273  | 85          | -      | <i>rpmA</i> | 50S ribosomal protein L27                                                                                                  |
| HH0010     | 9293  | 9604  | 104         | -      | <i>rplU</i> | 50S ribosomal protein L21                                                                                                  |
| HH0011     | 9758  | 10582 | 275         | +      |             | Conserved hypothetical protein, similar to <i>C. jejuni</i> putative periplasmic protein, related to metalloendopeptidases |
| HH0012     | 10574 | 11254 | 227         | -      |             | Conserved hypothetical protein, similar to <i>C. jejuni</i> putative transcriptional regulator Cj0466                      |
| HH0013     | 11394 | 13280 | 629         | +      | <i>gidA</i> | Glucose inhibited division protein A                                                                                       |
| HH0014     | 13308 | 13931 | 208         | +      |             | Conserved hypothetical protein, similar to <i>H. pylori</i> HP0232 secreted protein involved in flagellar motility         |
| HH0015     | 13936 | 15105 | 390         | +      | <i>ygiC</i> | Conserved hypothetical protein, similar to <i>H. pylori</i> HP0233                                                         |
| HH0016     | 15105 | 16670 | 522         | -      |             | Hypothetical protein, predicted secreted protein                                                                           |
| HH0017     | 16695 | 18134 | 480         | -      |             | Aspartate oxidase                                                                                                          |
| HH0018     | 18344 | 18799 | 152         | +      |             | Conserved hypothetical protein, similar to <i>H. pylori</i> HP0820                                                         |
| HH0019     | 18792 | 20654 | 621         | +      | <i>uvrC</i> | Excinuclease ABC subunit C                                                                                                 |
| HH0020     | 20820 | 22148 | 443         | +      |             | Hypothetical protein                                                                                                       |
| HH0021     | 22148 | 23620 | 491         | +      |             | Two-component sensor histidine kinase family protein                                                                       |
| HH0022     | 23613 | 24284 | 224         | +      |             | Two-component response regulator family protein                                                                            |
| HH0023     | 24450 | 25739 | 430         | +      | <i>rho</i>  | Transcription termination factor rho                                                                                       |
| HH0024     | 25751 | 26491 | 247         | +      | <i>murl</i> | Glutamate racemase                                                                                                         |
| HH0025     | 26507 | 28696 | 730         | -      |             | Conserved hypothetical protein, similar to <i>H. pylori</i> HP1089                                                         |
| HH0026     | 28811 | 30766 | 652         | -      | <i>tktA</i> | Transketolase                                                                                                              |
| HH0027     | 30804 | 33206 | 801         | -      | <i>pheT</i> | Phenylalanyl-tRNA synthetase $\beta$ subunit                                                                               |
| HH0028     | 33209 | 34207 | 333         | -      | <i>pheS</i> | Phenylalanyl-tRNA synthetase $\alpha$ subunit                                                                              |
| HH0029     | 34349 | 34687 | 113         | +      |             | HIT hydrolase family protein                                                                                               |
| HH0030     | 34762 | 35343 | 194         | +      | <i>tehB</i> | Conserved hypothetical protein, similar to methyltransferases involved in tellurite resistance                             |
| HH0031     | 35415 | 36698 | 428         | +      |             | Conserved hypothetical membrane protein, possible cation efflux pump                                                       |
| HH0032     | 37160 | 37594 | 145         | -      |             | Conserved hypothetical membrane protein                                                                                    |
| HH0033     | 37609 | 39801 | 731         | -      | <i>feoB</i> | Ferrous ion uptake system protein                                                                                          |
| HH0034     | 39888 | 41126 | 413         | -      |             | Hypothetical protein, predicted secreted protein                                                                           |
| HH0035     | 41139 | 41969 | 277         | -      | <i>panC</i> | Pantoate- $\beta$ -alanine ligase                                                                                          |
| HH0036     | 42009 | 42707 | 233         | -      | <i>pyrF</i> | Orotidine-5'-phosphate decarboxylase                                                                                       |
| HH0037     | 42711 | 43181 | 157         | -      | <i>nusB</i> | Transcription termination factor NusB                                                                                      |
| HH0038     | 43195 | 43662 | 156         | -      | <i>ribH</i> | Riboflavin synthase $\beta$ -chain                                                                                         |
| HH0039     | 43695 | 44504 | 270         | -      | <i>kdsA</i> | 3-deoxy-d-manno-octulosonic acid 8-phosphate synthetase                                                                    |
| HH0040     | 44518 | 45162 | 215         | -      | <i>icfA</i> | Carbonic anhydrase                                                                                                         |

|        |       |       |      |   |             |                                                                                                                                                                                |
|--------|-------|-------|------|---|-------------|--------------------------------------------------------------------------------------------------------------------------------------------------------------------------------|
| HH0041 | 45310 | 45987 | 226  | + |             | Conserved hypothetical protein, predicted membrane-associated                                                                                                                  |
| HH0042 | 46024 | 46497 | 158  | - | <i>yahD</i> | Ankyrin repeat family protein                                                                                                                                                  |
| HH0043 | 46501 | 47934 | 478  | - | <i>katA</i> | Catalase                                                                                                                                                                       |
| HH0044 | 48104 | 48685 | 194  | + | <i>ribA</i> | GTP cyclohydrolase II, RibA                                                                                                                                                    |
| HH0045 | 48725 | 49972 | 416  | + | <i>moeA</i> | Molybdopterin biosynthesis enzyme                                                                                                                                              |
| HH0046 | 50021 | 50242 | 74   | + | <i>moaD</i> | Molybdopterin converting factor, small subunit                                                                                                                                 |
| HH0047 | 50233 | 50703 | 157  | + | <i>moaE</i> | Molybdopterin converting factor, large subunit                                                                                                                                 |
| HH0048 | 50690 | 51250 | 187  | + | <i>mobB</i> | Molybdopterin-guanine dinucleotide biosynthesis protein MobB                                                                                                                   |
| HH0049 | 51253 | 51789 | 179  | + | <i>mog</i>  | Molybdopterin biosynthesis enzyme MoaB                                                                                                                                         |
| HH0050 | 51968 | 55225 | 1086 | + |             | Hypothetical protein                                                                                                                                                           |
| HH0051 | 55397 | 56263 | 289  | - |             | Hypothetical protein                                                                                                                                                           |
| HH0052 | 56477 | 56953 | 159  | + | <i>moaC</i> | Molybdenum cofactor biosynthesis enzyme MoaC                                                                                                                                   |
| HH0053 | 56957 | 58324 | 456  | + |             | Conserved hypothetical protein, similar to <i>Vibrio cholerae</i> VC0082, predicted secreted protein                                                                           |
| HH0054 | 58327 | 59910 | 528  | - |             | Conserved hypothetical protein, similar to <i>Yersinia pestis</i> YPO2377, predicted membrane-associated                                                                       |
| HH0055 | 59973 | 60287 | 105  | - | <i>trxA</i> | Thioredoxin                                                                                                                                                                    |
| HH0056 | 60643 | 61800 | 386  | + | <i>hyaA</i> | Ni/Fe hydrogenases $\beta$ subunit                                                                                                                                             |
| HH0057 | 61814 | 63541 | 576  | + | <i>hyaB</i> | Ni/Fe hydrogenase $\alpha$ subunit                                                                                                                                             |
| HH0058 | 63555 | 64316 | 254  | + | <i>hyaC</i> | Ni/Fe hydrogenase cytochrome b subunit                                                                                                                                         |
| HH0059 | 64327 | 64863 | 179  | + | <i>hyaD</i> | Hydrogenase formation/expression protease HyaD/HupD                                                                                                                            |
| HH0060 | 64863 | 66653 | 597  | + |             | Hypothetical protein                                                                                                                                                           |
| HH0061 | 66709 | 67476 | 256  | + |             | Conserved hypothetical protein, similar to <i>C. jejuni</i> putative periplasmic protein                                                                                       |
| HH0062 | 67490 | 68638 | 383  | + | <i>metB</i> | Cystathionine $\gamma$ -synthase                                                                                                                                               |
| HH0063 | 68643 | 69581 | 313  | + | <i>cysK</i> | Cysteine synthase                                                                                                                                                              |
| HH0064 | 69565 | 70341 | 259  | - |             | Conserved hypothetical protein, similar to putative <i>Bacteroides fragilis</i> glycosyl transferase                                                                           |
| HH0065 | 70338 | 70496 | 53   | - |             | Hypothetical protein                                                                                                                                                           |
| HH0066 | 70592 | 71062 | 157  | + |             | Conserved hypothetical protein, similar to sugar transferase, may become fused with HH0067 due to slipped strand mispairing                                                    |
| HH0067 | 71217 | 71822 | 202  | + |             | Conserved hypothetical protein, similar to sugar transferase, may become fused with HH0066 due to slipped strand mispairing                                                    |
| HH0068 | 71866 | 72771 | 302  | - |             | Conserved hypothetical protein, similar to <i>Streptococcus gordonii</i> probable glycosyl transferase                                                                         |
| HH0069 | 72771 | 73244 | 158  | - |             | $\alpha$ -1,2-fucosyltransferase fragment, may become fused with HH0070 due to slipped strand mispairing                                                                       |
| HH0070 | 73217 | 73666 | 150  | - |             | $\alpha$ -1,2-fucosyltransferase fragment, may become fused with HH0069 due to slipped strand mispairing                                                                       |
| HH0071 | 73686 | 74780 | 365  | - |             | Conserved hypothetical protein, predicted aminotransferase                                                                                                                     |
| HH0072 | 74804 | 75763 | 320  | - |             | Conserved hypothetical protein, predicted fucosyltransferase                                                                                                                   |
| HH0073 | 75769 | 76854 | 362  | - |             | Conserved hypothetical protein, predicted glycosyltransferase                                                                                                                  |
| HH0074 | 76929 | 77558 | 210  | - | <i>cfa</i>  | Conserved hypothetical protein, possibly related to methylase involved in ubiquinone/menaquinone biosynthesis, cyclopropane fatty acid synthase and related methyltransferases |
| HH0075 | 77554 | 78276 | 241  | - | <i>ygeA</i> | Aspartate racemase                                                                                                                                                             |
| HH0076 | 78400 | 79212 | 271  | - |             | Conserved hypothetical protein, similar to <i>Salmonella typhi</i> putative methyltransferase                                                                                  |
| HH0077 | 79212 | 79850 | 213  | - |             | Conserved hypothetical protein, predicted secreted protein                                                                                                                     |
| HH0078 | 79826 | 80422 | 199  | - | <i>serB</i> | Phosphoserine phosphatase                                                                                                                                                      |
| HH0079 | 80422 | 81888 | 489  | - |             | Hypothetical protein                                                                                                                                                           |
| HH0080 | 81953 | 83107 | 385  | - |             | Hypothetical protein                                                                                                                                                           |
| HH0081 | 83107 | 84057 | 317  | - |             | Conserved hypothetical protein, similar to glycosyltransferases                                                                                                                |
| HH0082 | 84053 | 84868 | 272  | - |             | UDP-N-acetylglucosamine 2-epimerase                                                                                                                                            |

|        |        |        |     |   |             |                                                                                                                                            |
|--------|--------|--------|-----|---|-------------|--------------------------------------------------------------------------------------------------------------------------------------------|
| HH0083 | 85290  | 86021  | 244 | - |             | Conserved hypothetical protein                                                                                                             |
| HH0084 | 86021  | 87661  | 547 | - |             | Conserved hypothetical protein, similar to <i>C. jejuni</i> CJ1302                                                                         |
| HH0085 | 87677  | 87772  | 32  | - |             | Conserved hypothetical protein fragment, similar to <i>C. jejuni</i> CJ1301, may become fused with HH0086 due to slipped strand mispairing |
| HH0086 | 87777  | 88088  | 104 | - |             | Conserved hypothetical protein fragment, similar to <i>C. jejuni</i> CJ1301, may become fused with HH0085 due to slipped strand mispairing |
| HH0087 | 88091  | 88342  | 84  | - |             | Acyl carrier protein                                                                                                                       |
| HH0088 | 88348  | 88917  | 190 | - |             | Hypothetical protein                                                                                                                       |
| HH0089 | 88917  | 89876  | 320 | - |             | Conserved hypothetical protein                                                                                                             |
| HH0090 | 89985  | 91340  | 452 | - |             | Conserved hypothetical protein, similar to <i>Haemophilus influenzae</i> O-succinylbenzoate-CoA ligase                                     |
| HH0091 | 91343  | 92851  | 503 | - |             | Hypothetical protein                                                                                                                       |
| HH0092 | 92847  | 93578  | 244 | - |             | Conserved hypothetical protein, similar to <i>Escherichia coli</i> 3-oxoacyl-[acyl-carrier-protein] reductase                              |
| HH0093 | 93574  | 93864  | 97  | - |             | Hypothetical protein                                                                                                                       |
| HH0094 | 93868  | 94428  | 187 | - |             | Hypothetical protein                                                                                                                       |
| HH0095 | 94431  | 94991  | 187 | - |             | Conserved hypothetical protein, similar to <i>C. jejuni</i> putative acetyl transferase                                                    |
| HH0096 | 95258  | 95701  | 148 | + |             | Conserved hypothetical protein                                                                                                             |
| HH0097 | 95714  | 96112  | 133 | + |             | Conserved hypothetical protein                                                                                                             |
| HH0098 | 96477  | 97508  | 344 | - |             | Possible molybdenum cofactor biosynthesis protein A                                                                                        |
| HH0099 | 97590  | 98618  | 343 | - |             | DTDP-D-glucose 4,6-dehydratase                                                                                                             |
| HH0100 | 98621  | 99493  | 291 | - |             | Conserved hypothetical protein, similar to <i>C. jejuni</i> glucose-1-phosphate thymidyltransferase                                        |
| HH0101 | 99553  | 101364 | 604 | - | <i>lepA</i> | Membrane GTPase LepA                                                                                                                       |
| HH0102 | 101556 | 102713 | 386 | + | <i>ftsW</i> | Putative cell division protein FtsW                                                                                                        |
| HH0103 | 102730 | 103245 | 172 | + |             | Hypothetical protein, predicted membrane-associated                                                                                        |
| HH0104 | 103256 | 103993 | 246 | + | <i>hemD</i> | Uroporphyrinogen-III synthase HemD                                                                                                         |
| HH0105 | 104073 | 104900 | 276 | + |             | Conserved hypothetical protein, possible parvulin-like peptidyl-prolyl isomerase                                                           |
| HH0106 | 104932 | 105852 | 307 | + | <i>fba</i>  | Fructose-bisphosphate aldolase                                                                                                             |
| HH0107 | 105950 | 106108 | 53  | + |             | Hypothetical protein                                                                                                                       |
| HH0108 | 106199 | 106759 | 187 | + | <i>efp</i>  | Translation elongation factor P                                                                                                            |
| HH0109 | 106824 | 109400 | 859 | - | <i>clpA</i> | ATP-dependent CLP protease ClpA, ATP-binding subunit                                                                                       |
| HH0110 | 109550 | 110977 | 476 | - |             | Conserved hypothetical protein, possible putative thiophene/furan oxidation protein                                                        |
| HH0111 | 110916 | 111719 | 268 | - |             | Conserved hypothetical protein                                                                                                             |
| HH0112 | 111725 | 113497 | 591 | - |             | Conserved hypothetical membrane protein, SpoIIJ family                                                                                     |
| HH0113 | 113505 | 113771 | 89  | - |             | Conserved hypothetical protein                                                                                                             |
| HH0114 | 113789 | 113956 | 56  | + |             | Hypothetical protein                                                                                                                       |
| HH0115 | 113889 | 114326 | 146 | - | <i>rnpA</i> | Ribonuclease P, protein component                                                                                                          |
| HH0116 | 114353 | 114484 | 44  | - | <i>rpmH</i> | Ribosomal protein L34                                                                                                                      |
| HH0117 | 114547 | 115260 | 238 | - |             | Conserved hypothetical protein, predicted secreted protein                                                                                 |
| HH0118 | 115270 | 117186 | 639 | - |             | Hypothetical protein, predicted membrane-associated                                                                                        |
| HH0119 | 117211 | 117588 | 126 | - |             | Biopolymer transport protein, ExbD-like                                                                                                    |
| HH0120 | 117588 | 118037 | 150 | - |             | Biopolymer transport protein, ExbB-like                                                                                                    |
| HH0121 | 118059 | 118523 | 155 | - | <i>smpB</i> | TmRNA-binding protein SmpB                                                                                                                 |
| HH0122 | 118528 | 119205 | 226 | - |             | Conserved hypothetical protein, YchB/YabH family                                                                                           |
| HH0123 | 119338 | 119574 | 79  | - |             | Conserved hypothetical protein, similar to <i>H. pylori</i> putative carbon storage regulator                                              |
| HH0124 | 119549 | 120400 | 284 | - | <i>truB</i> | TRNA pseudouridine synthase B                                                                                                              |

|        |        |        |      |   |             |                                                                                                                                       |
|--------|--------|--------|------|---|-------------|---------------------------------------------------------------------------------------------------------------------------------------|
| HH0125 | 120466 | 121524 | 353  | - |             | Hypothetical protein, predicted secreted protein                                                                                      |
| HH0126 | 121534 | 122391 | 286  | - |             | Hypothetical protein, predicted membrane-associated                                                                                   |
| HH0127 | 122391 | 122885 | 165  | - |             | Conserved hypothetical protein, HIT family                                                                                            |
| HH0128 | 122901 | 124379 | 493  | - |             | Conserved hypothetical protein, similar to <i>C. jejuni</i> putative UDP-N-acetylmuramoylalanyl-D-glutamyl-2,6-diaminopimelate ligase |
| HH0129 | 124393 | 124680 | 96   | - |             | Conserved hypothetical protein, possible acylphosphatase                                                                              |
| HH0130 | 124680 | 125282 | 201  | - |             | Conserved hypothetical protein, similar to <i>H. pylori</i> JHP0676                                                                   |
| HH0131 | 125436 | 126485 | 350  | - | <i>ddl</i>  | D-alanine-D-alanine ligase                                                                                                            |
| HH0132 | 126491 | 129319 | 943  | - | <i>uvrA</i> | Excinuclease ABC subunit A                                                                                                            |
| HH0133 | 129368 | 129643 | 92   | - |             | Hypothetical protein, predicted secreted protein                                                                                      |
| HH0134 | 129507 | 129626 | 40   | + |             | Hypothetical protein                                                                                                                  |
| HH0135 | 129670 | 131247 | 526  | - | <i>serA</i> | D-3-phosphoglycerate dehydrogenase                                                                                                    |
| HH0136 | 131272 | 131733 | 154  | - |             | Conserved hypothetical protein, similar to <i>H. pylori</i> HP0398, predicted secreted protein                                        |
| HH0137 | 131753 | 133408 | 552  | - | <i>rpsA</i> | Ribosomal protein S1                                                                                                                  |
| HH0138 | 133505 | 134323 | 273  | - | <i>lytB</i> | Penicillin tolerance protein LytB                                                                                                     |
| HH0139 | 134316 | 135629 | 438  | - | <i>aroA</i> | 3-phosphoshikimate 1-carboxyvinyltransferase                                                                                          |
| HH0140 | 135699 | 136754 | 352  | - |             | Two component system sensor kinase protein                                                                                            |
| HH0141 | 136741 | 137121 | 127  | - |             | Conserved hypothetical protein, similar to <i>C. jejuni</i> CJ1463                                                                    |
| HH0142 | 137135 | 138178 | 348  | - | <i>flgI</i> | Flagellar basal-body P-ring protein FlgI                                                                                              |
| HH0143 | 138402 | 139010 | 203  | - |             | Conserved hypothetical protein, similar to <i>H. pylori</i> JHP1024, predicted secreted protein                                       |
| HH0144 | 139013 | 139441 | 143  | - |             | Conserved hypothetical protein                                                                                                        |
| HH0145 | 139588 | 139713 | 42   | + |             | Hypothetical protein, predicted secreted protein                                                                                      |
| HH0146 | 139783 | 139878 | 32   | - |             | Conserved hypothetical protein, similar to <i>H. pylori</i> HP1515                                                                    |
| HH0147 | 139870 | 141609 | 580  | + |             | Hypothetical protein, predicted secreted protein                                                                                      |
| HH0148 | 141625 | 141951 | 109  | - |             | Hypothetical protein, predicted secreted protein                                                                                      |
| HH0149 | 141968 | 142582 | 205  | - | <i>hisG</i> | ATP phosphoribosyltransferase                                                                                                         |
| HH0150 | 142617 | 143234 | 206  | - |             | Conserved hypothetical protein, similar to <i>C. jejuni</i> CJ0394c                                                                   |
| HH0151 | 143237 | 144259 | 341  | - |             | Conserved hypothetical protein, similar to <i>H. pylori</i> JHP0797, predicted secreted protein                                       |
| HH0152 | 144292 | 144942 | 217  | - |             | Conserved hypothetical protein, similar to <i>H. pylori</i> JHP0798, predicted membrane-associated                                    |
| HH0153 | 144956 | 145429 | 158  | - | <i>dut</i>  | Deoxyuridine 5'-triphosphate nucleotidohydrolase                                                                                      |
| HH0154 | 145436 | 145924 | 163  | - | <i>greA</i> | Transcription elongation factor GreA                                                                                                  |
| HH0155 | 146041 | 147339 | 433  | - | <i>putP</i> | Sodium/proline symporter                                                                                                              |
| HH0156 | 147612 | 151109 | 1166 | - |             | Conserved hypothetical protein, similar to <i>C. jejuni</i> dehydrogenase CJ1505                                                      |
| HH0157 | 151143 | 151235 | 31   | - |             | Hypothetical protein                                                                                                                  |
| HH0158 | 151422 | 154232 | 937  | + | <i>napA</i> | Periplasmic nitrate reductase, large subunit                                                                                          |
| HH0159 | 154245 | 155084 | 280  | + |             | Conserved hypothetical protein, similar to <i>C. jejuni</i> putative ferredoxin                                                       |
| HH0160 | 155087 | 156013 | 309  | + |             | Conserved hypothetical protein, similar to <i>C. jejuni</i> putative ferredoxin                                                       |
| HH0161 | 156013 | 156573 | 187  | + | <i>napB</i> | Periplasmic nitrate reductase, small subunit                                                                                          |
| HH0162 | 156588 | 157634 | 349  | + |             | Conserved hypothetical protein, similar to <i>C. jejuni</i> putative periplasmic protein CJ0784                                       |
| HH0163 | 157637 | 157993 | 119  | + | <i>napD</i> | Periplasmic nitrate reductase component NapD                                                                                          |
| HH0164 | 158074 | 158463 | 130  | - |             | Conserved hypothetical protein, similar to <i>C. jejuni</i> CJ0465c                                                                   |
| HH0165 | 158586 | 159020 | 145  | - |             | Conserved hypothetical protein, similar to <i>H. pylori</i> HP1502, predicted membrane-associated                                     |
| HH0166 | 159256 | 159705 | 150  | + |             | Conserved hypothetical protein, similar to <i>C. jejuni</i> putative transcriptional regulator Cj0466                                 |
| HH0167 | 159706 | 161079 | 458  | - |             | Conserved hypothetical membrane protein, possible cation efflux pump                                                                  |

|        |        |        |      |   |             |                                                                                                                  |
|--------|--------|--------|------|---|-------------|------------------------------------------------------------------------------------------------------------------|
| HH0168 | 161096 | 161818 | 241  | - | <i>kdsB</i> | 3-deoxy-manno-octulosonate cytidyltransferase                                                                    |
| HH0169 | 161890 | 163098 | 403  | - |             | Conserved hypothetical protein                                                                                   |
| HH0170 | 163233 | 163409 | 59   | + |             | Hypothetical protein, predicted secreted protein                                                                 |
| HH0171 | 163418 | 165415 | 666  | + |             | Conserved hypothetical protein, predicted membrane-associated                                                    |
| HH0172 | 165492 | 166625 | 378  | + | <i>gmd</i>  | GDP-D-mannose dehydratase                                                                                        |
| HH0173 | 166657 | 167697 | 347  | + |             | Conserved hypothetical protein, similar to <i>C. jejuni</i> putative fucose synthetase                           |
| HH0174 | 167705 | 170830 | 1042 | - |             | Conserved hypothetical membrane protein, possible cation efflux pump                                             |
| HH0175 | 170843 | 172021 | 393  | - |             | Conserved hypothetical membrane protein, possible cation efflux pump                                             |
| HH0176 | 172276 | 172770 | 165  | - | <i>ygaG</i> | LuxS protein involved in autoinducer AI2 synthesis                                                               |
| HH0177 | 172829 | 173260 | 144  | - |             | Conserved hypothetical protein, similar to <i>C. jejuni</i> membrane protein CJ0341c                             |
| HH0178 | 173307 | 174239 | 311  | - |             | Conserved hypothetical protein, putative 2-hydroxy acid dehydrogenase                                            |
| HH0179 | 174324 | 175163 | 280  | + | <i>argB</i> | Acetylglutamate kinase                                                                                           |
| HH0180 | 175163 | 175639 | 159  | + |             | Conserved hypothetical protein, similar to <i>H. pylori</i> JHP0087                                              |
| HH0181 | 175658 | 175891 | 78   | + |             | Hypothetical protein, may become fused with HH0182 due to slipped strand mispairing                              |
| HH0182 | 175875 | 176453 | 193  | + |             | Hypothetical protein, may become fused with HH0181 due to slipped strand mispairing                              |
| HH0183 | 176947 | 179181 | 745  | - | <i>flgE</i> | Flagellar hook protein FlgE, similar to <i>H. pylori</i> HP0908 (FlgE2)                                          |
| HH0184 | 179181 | 179999 | 273  | - | <i>flgD</i> | Flagellar hook assembly protein FlgD, similar to <i>H. pylori</i> HP0907                                         |
| HH0185 | 180024 | 181256 | 411  | - |             | Hypothetical protein                                                                                             |
| HH0186 | 181396 | 182301 | 302  | - |             | Hypothetical protein                                                                                             |
| HH0187 | 182571 | 183254 | 228  | - |             | Conserved hypothetical protein, similar to <i>Neisseria meningitidis</i> putative periplasmic protein            |
| HH0188 | 183257 | 184150 | 298  | - |             | Hypothetical protein, predicted secreted protein                                                                 |
| HH0189 | 184276 | 185013 | 246  | - |             | Hypothetical protein, predicted secreted protein                                                                 |
| HH0190 | 185032 | 185337 | 102  | - |             | Hypothetical protein, predicted secreted protein                                                                 |
| HH0191 | 185594 | 185713 | 40   | + |             | Hypothetical protein, predicted membrane-associated                                                              |
| HH0192 | 185786 | 185908 | 41   | - |             | Hypothetical protein                                                                                             |
| HH0193 | 186064 | 186579 | 172  | - |             | Conserved hypothetical protein, similar to <i>C. jejuni</i> possible deoxycytidine triphosphate deaminase CJ1292 |
| HH0194 | 186721 | 187191 | 157  | + | <i>accB</i> | Biotin carboxyl carrier protein                                                                                  |
| HH0195 | 187204 | 188565 | 454  | + | <i>accC</i> | Biotin carboxylase                                                                                               |
| HH0196 | 188600 | 189286 | 229  | + |             | Hypothetical protein                                                                                             |
| HH0197 | 189306 | 190481 | 392  | + |             | Conserved hypothetical protein, predicted aminotransferase                                                       |
| HH0198 | 190571 | 192226 | 552  | + |             | Conserved hypothetical protein, similar to <i>C. jejuni</i> putative small Ni/fe-hydrogenase CJ1399c             |
| HH0199 | 192315 | 193115 | 267  | + |             | Hypothetical protein                                                                                             |
| HH0200 | 193150 | 193824 | 225  | + |             | Hypothetical protein                                                                                             |
| HH0201 | 194149 | 194655 | 169  | + |             | Conserved hypothetical protein, predicted membrane-associated                                                    |
| HH0202 | 194663 | 195127 | 155  | + |             | Conserved hypothetical protein, similar to tellurite resistance permeases                                        |
| HH0203 | 195140 | 196237 | 366  | - | <i>glf</i>  | UDP-galactopyranose mutase                                                                                       |
| HH0204 | 196244 | 197284 | 347  | - |             | Conserved hypothetical glycosyl transferase                                                                      |
| HH0205 | 197368 | 198495 | 376  | - |             | Conserved hypothetical glycosyl transferase                                                                      |
| HH0206 | 198560 | 199489 | 310  | - |             | Conserved hypothetical protein, similar to <i>Klebsiella pneumoniae</i> RFBC protein                             |
| HH0207 | 199495 | 200310 | 272  | - |             | Conserved hypothetical protein, similar to <i>K. pneumoniae</i> RFBC protein                                     |
| HH0208 | 200542 | 201606 | 355  | - |             | 3,4-dihydroxy-2-butanone 4-phosphate synthase                                                                    |
| HH0209 | 201641 | 201745 | 35   | - |             | Hypothetical protein                                                                                             |
| HH0210 | 201769 | 202236 | 156  | - | <i>dps</i>  | Starvation-inducible DNA-binding protein Dps                                                                     |
| HH0211 | 202278 | 202397 | 40   | - |             | Hypothetical protein                                                                                             |

|        |        |        |      |   |             |                                                                                                                                |
|--------|--------|--------|------|---|-------------|--------------------------------------------------------------------------------------------------------------------------------|
| HH0212 | 203064 | 203537 | 158  | + |             | Hypothetical protein                                                                                                           |
| HH0213 | 203584 | 204453 | 290  | + |             | Hypothetical protein                                                                                                           |
| HH0214 | 204452 | 205273 | 274  | - |             | Conserved hypothetical protein                                                                                                 |
| HH0215 | 205388 | 205891 | 168  | + |             | Conserved hypothetical protein, cytochrome c-type protein                                                                      |
| HH0216 | 205917 | 206237 | 107  | + |             | Conserved hypothetical protein, similar to <i>C. jejuni</i> putative periplasmic cytochrome c CJ1357c                          |
| HH0217 | 206284 | 207765 | 494  | + |             | Conserved hypothetical protein, similar to cytochrome c-type proteins                                                          |
| HH0218 | 207823 | 207960 | 46   | + |             | Hypothetical protein                                                                                                           |
| HH0219 | 208046 | 208867 | 274  | + |             | Hypothetical protein                                                                                                           |
| HH0220 | 208882 | 209289 | 136  | + | <i>dgkA</i> | Diacylglycerol kinase                                                                                                          |
| HH0221 | 209302 | 210069 | 256  | - |             | Hypothetical protein, predicted secreted protein                                                                               |
| HH0222 | 210148 | 213219 | 1024 | - |             | Conserved hypothetical protein, similar to <i>H. pylori</i> putative resistance-nodulation-division efflux system protein HefC |
| HH0223 | 213222 | 213920 | 233  | - |             | Conserved hypothetical protein, similar to <i>H. pylori</i> putative resistance-nodulation-division efflux system protein HefB |
| HH0224 | 213942 | 215297 | 452  | - |             | Conserved hypothetical protein, similar to <i>H. pylori</i> putative resistance-nodulation-division efflux system protein HefA |
| HH0225 | 215397 | 216173 | 259  | - | <i>fdhD</i> | FdhD/NarQ protein required for formate dehydrogenase activity                                                                  |
| HH0226 | 216185 | 217156 | 324  | - | <i>fdhC</i> | Formate dehydrogenase-N, $\gamma$ subunit                                                                                      |
| HH0227 | 217170 | 217796 | 209  | - | <i>fdhB</i> | Fe-S-cluster-containing formate dehydrogenase component 1                                                                      |
| HH0228 | 217814 | 220057 | 748  | - |             | Conserved hypothetical protein, similar to <i>C. jejuni</i> putative formate dehydrogenase, iron-sulfur subunit                |
| HH0229 | 220082 | 220633 | 184  | - |             | Conserved hypothetical protein, similar to <i>C. jejuni</i> putative formate dehydrogenase, large subunit                      |
| HH0230 | 220656 | 220868 | 71   | - |             | Conserved hypothetical protein, similar to <i>C. jejuni</i> possible periplasmic protein CJ1513c                               |
| HH0231 | 220960 | 221601 | 214  | - |             | Hypothetical protein                                                                                                           |
| HH0232 | 221604 | 223130 | 509  | - |             | Conserved hypothetical protein, similar to <i>C. jejuni</i> putative ferredoxin CJ1377c                                        |
| HH0233 | 223221 | 224198 | 326  | - |             | Hypothetical protein, predicted membrane-associated                                                                            |
| HH0234 | 224336 | 225118 | 261  | - |             | Hypothetical protein, predicted membrane-associated                                                                            |
| HH0235 | 225108 | 226610 | 501  | - |             | Hypothetical protein                                                                                                           |
| HH0236 | 226610 | 227245 | 212  | - |             | Hypothetical protein, predicted membrane-associated                                                                            |
| HH0237 | 227245 | 228036 | 264  | - |             | Hypothetical protein                                                                                                           |
| HH0238 | 228129 | 228986 | 286  | - |             | DNA adenine methylase                                                                                                          |
| HH0239 | 228986 | 229768 | 261  | - |             | Type II restriction endonuclease                                                                                               |
| HH0240 | 229867 | 230250 | 128  | - |             | Hypothetical protein                                                                                                           |
| HH0241 | 230309 | 231583 | 425  | - |             | Hypothetical protein, predicted membrane-associated                                                                            |
| HH0242 | 231621 | 234416 | 932  | - |             | Hypothetical protein                                                                                                           |
| HH0243 | 234546 | 235052 | 169  | - |             | Conserved hypothetical protein, similar to <i>V. cholerae</i> hcp protein VCA0017 and VC1415                                   |
| HH0244 | 235152 | 236144 | 331  | - |             | Conserved hypothetical protein, similar to <i>V. cholerae</i> VCA0111                                                          |
| HH0245 | 236144 | 237856 | 571  | - |             | Conserved hypothetical protein, similar to <i>V. cholerae</i> VCA0110                                                          |
| HH0246 | 237929 | 238315 | 129  | - |             | Conserved hypothetical protein, similar to <i>V. cholerae</i> VCA0109                                                          |
| HH0247 | 238322 | 239791 | 490  | - |             | Conserved hypothetical protein, similar to <i>V. cholerae</i> VCA0108                                                          |
| HH0248 | 239842 | 240336 | 165  | - |             | Conserved hypothetical protein, similar to <i>V. cholerae</i> VCA0107                                                          |
| HH0249 | 240524 | 241057 | 178  | + |             | Conserved hypothetical protein, similar to <i>V. cholerae</i> VCA0113                                                          |
| HH0250 | 241053 | 242429 | 459  | + |             | Conserved hypothetical protein, similar to <i>V. cholerae</i> VCA0114                                                          |
| HH0251 | 242444 | 243229 | 262  | + |             | Conserved hypothetical protein, similar to <i>V. cholerae</i> VCA0115                                                          |
| HH0252 | 243237 | 246788 | 1184 | + |             | Conserved hypothetical protein, similar to <i>V. cholerae</i> lcmF, putative VirB10-like protein                               |
| HH0253 | 246801 | 247778 | 326  | + |             | Hypothetical protein                                                                                                           |
| HH0254 | 247875 | 249140 | 422  | - |             | Hypothetical protein                                                                                                           |
| HH0255 | 249171 | 253067 | 1299 | - |             | Hypothetical protein, predicted membrane-associated                                                                            |

|        |        |        |      |   |                                                                                 |
|--------|--------|--------|------|---|---------------------------------------------------------------------------------|
| HH0256 | 253176 | 254729 | 518  | - | Hypothetical protein                                                            |
| HH0257 | 254725 | 256059 | 445  | - | Hypothetical protein                                                            |
| HH0258 | 256072 | 256437 | 122  | - | Hypothetical protein, predicted membrane-associated                             |
| HH0259 | 256451 | 257131 | 227  | - | Hypothetical protein                                                            |
| HH0260 | 257127 | 258914 | 596  | - | Conserved hypothetical protein, putative VirB4-like protein                     |
| HH0261 | 258914 | 259519 | 202  | - | Hypothetical protein, predicted membrane-associated                             |
| HH0262 | 260342 | 260572 | 77   | - | Hypothetical protein                                                            |
| HH0263 | 260653 | 260802 | 50   | - | Hypothetical protein, predicted membrane-associated                             |
| HH0264 | 260979 | 261083 | 35   | - | Hypothetical protein                                                            |
| HH0265 | 261105 | 261452 | 116  | + | Hypothetical protein                                                            |
| HH0266 | 261497 | 262195 | 233  | + | Hypothetical protein                                                            |
| HH0267 | 262248 | 262460 | 71   | + | Hypothetical protein, predicted membrane-associated                             |
| HH0268 | 262472 | 262780 | 103  | + | Conserved hypothetical protein, similar to <i>C. jejuni</i> periplasmic protein |
| HH0269 | 263408 | 264250 | 281  | - | Integrase                                                                       |
| HH0270 | 264684 | 266786 | 701  | - | Hypothetical protein                                                            |
| HH0271 | 266913 | 267014 | 34   | + | Hypothetical protein                                                            |
| HH0272 | 267832 | 268335 | 168  | - | Hypothetical protein                                                            |
| HH0273 | 268353 | 268697 | 115  | - | Hypothetical protein                                                            |
| HH0274 | 268844 | 269578 | 245  | - | Hypothetical protein                                                            |
| HH0275 | 270051 | 273476 | 1142 | + | Conserved hypothetical protein, putative VirD4-like protein                     |
| HH0276 | 273586 | 274074 | 163  | - | Hypothetical protein                                                            |
| HH0277 | 274388 | 274927 | 180  | + | Hypothetical protein                                                            |
| HH0278 | 274985 | 275350 | 122  | + | Conserved hypothetical protein                                                  |
| HH0279 | 275943 | 276161 | 73   | + | Hypothetical protein                                                            |
| HH0280 | 276333 | 277094 | 254  | + | Hypothetical protein                                                            |
| HH0281 | 277275 | 277757 | 161  | - | Hypothetical protein                                                            |
| HH0282 | 277771 | 278403 | 211  | - | Hypothetical protein                                                            |
| HH0283 | 278551 | 278862 | 104  | - | Hypothetical protein                                                            |
| HH0284 | 279094 | 279288 | 65   | - | Hypothetical protein, predicted secreted protein                                |
| HH0285 | 279288 | 279725 | 146  | - | Hypothetical protein                                                            |
| HH0286 | 279848 | 279973 | 42   | - | Hypothetical protein                                                            |
| HH0287 | 280156 | 280551 | 132  | - | Hypothetical protein, predicted membrane-associated                             |
| HH0288 | 280627 | 280926 | 100  | - | Hypothetical protein                                                            |
| HH0289 | 280978 | 282777 | 600  | - | Hypothetical protein                                                            |
| HH0290 | 282794 | 283441 | 216  | - | Hypothetical protein, predicted secreted protein                                |
| HH0291 | 283453 | 284859 | 469  | - | Hypothetical protein                                                            |
| HH0292 | 284859 | 285515 | 219  | - | Hypothetical protein                                                            |
| HH0293 | 285605 | 286213 | 203  | - | Hypothetical protein, predicted membrane-associated                             |
| HH0294 | 286293 | 288848 | 852  | - | Hypothetical protein, predicted membrane-associated                             |
| HH0295 | 288851 | 289528 | 226  | - | Hypothetical protein, predicted membrane-associated                             |
| HH0296 | 289528 | 290304 | 259  | - | Hypothetical protein, predicted membrane-associated                             |
| HH0297 | 290307 | 290471 | 55   | - | Hypothetical protein                                                            |
| HH0298 | 290471 | 291052 | 194  | - | Hypothetical protein, predicted membrane-associated                             |
| HH0299 | 291052 | 291627 | 192  | - | Hypothetical protein                                                            |

|        |        |        |      |   |             |                                                                                                                     |
|--------|--------|--------|------|---|-------------|---------------------------------------------------------------------------------------------------------------------|
| HH0300 | 291635 | 292222 | 196  | - |             | Hypothetical protein, predicted membrane-associated                                                                 |
| HH0301 | 292584 | 293294 | 237  | - |             | Hypothetical protein, predicted secreted protein                                                                    |
| HH0302 | 293315 | 294244 | 310  | - |             | Hypothetical protein                                                                                                |
| HH0303 | 294427 | 295005 | 193  | - | <i>trpG</i> | Para-aminobenzoate synthase glutamine amidotransferase component II                                                 |
| HH0304 | 295005 | 296852 | 616  | - | <i>trpE</i> | Para-aminobenzoate synthase glutamine amidotransferase component I                                                  |
| HH0305 | 296981 | 299239 | 753  | + |             | Hypothetical protein                                                                                                |
| HH0306 | 299261 | 302749 | 1163 | - |             | Conserved hypothetical protein, acyl transferase family                                                             |
| HH0307 | 302808 | 303746 | 313  | - |             | Conserved hypothetical protein, similar to <i>C. jejuni</i> putative periplasmic protein                            |
| HH0308 | 303839 | 304756 | 306  | - |             | Conserved hypothetical protein, GTPases, ERA family                                                                 |
| HH0309 | 304777 | 306108 | 444  | - | <i>hslU</i> | ATP-dependent protease subunit HslU/ClpY                                                                            |
| HH0310 | 306125 | 306664 | 180  | - | <i>hslV</i> | ATP-dependent protease subunit HslV/ClpQ                                                                            |
| HH0311 | 306682 | 307122 | 147  | - | <i>rplI</i> | Ribosomal protein L9                                                                                                |
| HH0312 | 307144 | 307869 | 242  | + |             | Conserved hypothetical protein                                                                                      |
| HH0313 | 307883 | 308833 | 317  | - |             | Hypothetical protein, predicted secreted protein                                                                    |
| HH0314 | 308846 | 310447 | 534  | - | <i>trpD</i> | Anthranilate phosphoribosyltransferase                                                                              |
| HH0315 | 310454 | 311947 | 498  | - | <i>trpE</i> | Anthranilate synthases component I                                                                                  |
| HH0316 | 311981 | 312517 | 179  | - | <i>lolA</i> | Outer membrane lipoproteins carrier protein LolA                                                                    |
| HH0317 | 312776 | 315187 | 804  | + | <i>secA</i> | Preprotein translocase subunit SecA                                                                                 |
| HH0318 | 315191 | 316441 | 417  | + |             | Conserved hypothetical protein, similar to <i>C. jejuni</i> putative integral membrane protein CJ0941c              |
| HH0319 | 316541 | 316789 | 83   | + |             | Hypothetical protein, possible RNA-binding protein with RRM domain                                                  |
| HH0320 | 316799 | 317803 | 335  | - | <i>hypE</i> | Hydrogenase isoenzymes formation protein                                                                            |
| HH0321 | 317825 | 319504 | 560  | - |             | Conserved hypothetical protein, possible helicase subunit                                                           |
| HH0322 | 319511 | 320650 | 380  | - | <i>hypD</i> | Hydrogenase isoenzymes formation protein                                                                            |
| HH0323 | 320646 | 321362 | 239  | - |             | Conserved hypothetical protein, similar to <i>H. pylori</i> putative lipopolysaccharide biosynthesis protein HP0805 |
| HH0324 | 321413 | 321670 | 86   | - | <i>hypC</i> | Hydrogenase isoenzymes formation protein HypC                                                                       |
| HH0325 | 321683 | 322408 | 242  | - | <i>hypB</i> | Hydrogenase expression/formation protein HypB                                                                       |
| HH0326 | 322392 | 324812 | 807  | - | <i>hypF</i> | Transcriptional regulatory protein HypF                                                                             |
| HH0327 | 324933 | 326138 | 402  | + | <i>pgk</i>  | 3-phosphoglycerate kinase                                                                                           |
| HH0328 | 326141 | 326941 | 267  | + |             | Conserved hypothetical protein, similar to <i>C. jejuni</i> CJ1113                                                  |
| HH0329 | 327008 | 327316 | 103  | + |             | Hypothetical protein, may become fused with HH0330 due to slipped strand mispairing                                 |
| HH0330 | 327409 | 327852 | 148  | + |             | Hypothetical protein, may become fused with HH0329 due to slipped strand mispairing                                 |
| HH0331 | 327821 | 328330 | 170  | + | <i>panD</i> | Aspartate 1-decarboxylase                                                                                           |
| HH0332 | 328336 | 328659 | 108  | + | <i>ybaB</i> | Conserved hypothetical protein, similar to <i>C. jejuni</i> CJ1642                                                  |
| HH0333 | 328655 | 329719 | 355  | + |             | Conserved hypothetical protein, similar to <i>H. pylori</i> HP0036, predicted secreted protein                      |
| HH0334 | 329731 | 330594 | 288  | + | <i>ispA</i> | Geranyltranstransferase                                                                                             |
| HH0335 | 330594 | 331385 | 264  | + | <i>surE</i> | Stationary phase survival protein SurE                                                                              |
| HH0336 | 331367 | 332065 | 233  | + |             | Conserved hypothetical protein, similar to <i>H. pylori</i> JHP0692, MoeB/ThiF family                               |
| HH0337 | 332069 | 332200 | 44   | + |             | Conserved hypothetical protein, similar to <i>H. pylori</i> JHP0693                                                 |
| HH0338 | 332213 | 333100 | 296  | + |             | Conserved hypothetical protein, similar to <i>C. jejuni</i> putative hydrolase CJ0947c                              |
| HH0339 | 333211 | 333645 | 145  | + |             | Conserved hypothetical protein, similar to <i>Pseudomonas aeruginosa</i> PA4578, predicted secreted protein         |
| HH0340 | 333898 | 335712 | 605  | + |             | Conserved hypothetical protein, similar to <i>P. aeruginosa</i> PA4579                                              |
| HH0341 | 335722 | 336285 | 188  | - |             | Conserved hypothetical protein, similar to <i>C. jejuni</i> CJ1254                                                  |
| HH0342 | 336272 | 336652 | 127  | - |             | Hypothetical protein, predicted membrane-associated                                                                 |
| HH0343 | 336658 | 336819 | 54   | - |             | Hypothetical protein, predicted secreted protein                                                                    |



|        |        |        |      |   |             |                                                                                                |
|--------|--------|--------|------|---|-------------|------------------------------------------------------------------------------------------------|
| HH0344 | 336719 | 336925 | 69   | + |             | Hypothetical protein, predicted membrane-associated                                            |
| HH0345 | 336946 | 337602 | 219  | + | <i>glnP</i> | Glutamine ABC transporter permease GlnP                                                        |
| HH0346 | 337653 | 338258 | 202  | + |             | Conserved hypothetical protein, similar to amino acid ABC transporter permeases                |
| HH0347 | 338258 | 339007 | 250  | + | <i>glnQ</i> | Conserved hypothetical protein, similar to amino acid ABC transporter ATP binding components   |
| HH0348 | 339010 | 339528 | 173  | - |             | Hypothetical protein                                                                           |
| HH0349 | 339646 | 340623 | 326  | - |             | Hypothetical protein, predicted secreted protein                                               |
| HH0350 | 340629 | 340967 | 113  | - |             | Conserved hypothetical protein, similar to <i>H. pylori</i> HP1414                             |
| HH0351 | 341000 | 341653 | 218  | - |             | Conserved hypothetical protein, similar to <i>H. pylori</i> HP1337                             |
| HH0352 | 341637 | 342065 | 143  | - |             | Conserved hypothetical protein, similar to <i>H. pylori</i> HP1338                             |
| HH0353 | 342217 | 342651 | 145  | + |             | Biopolymer transport protein, ExbB-like                                                        |
| HH0354 | 342657 | 343034 | 126  | + |             | Biopolymer transport protein, ExbD-like                                                        |
| HH0355 | 343003 | 343728 | 242  | + |             | TonB-like protein                                                                              |
| HH0356 | 343756 | 344163 | 136  | - |             | Hypothetical protein                                                                           |
| HH0357 | 344222 | 344506 | 95   | - |             | Hypothetical protein, predicted secreted protein                                               |
| HH0358 | 344513 | 346588 | 692  | - | <i>fusA</i> | Translation elongation factor EF-G                                                             |
| HH0359 | 346607 | 347071 | 155  | - | <i>rpsG</i> | Ribosomal protein S7                                                                           |
| HH0360 | 347090 | 347476 | 129  | - | <i>rpsL</i> | Ribosomal protein S12                                                                          |
| HH0361 | 347571 | 356252 | 2894 | - | <i>rpoB</i> | DNA-dependent RNA polymerase $\beta$ subunit                                                   |
| HH0362 | 356403 | 356780 | 126  | - | <i>rplL</i> | Ribosomal protein L7/L12                                                                       |
| HH0363 | 356804 | 357283 | 160  | - | <i>rplJ</i> | Ribosomal protein L10                                                                          |
| HH0364 | 357377 | 358078 | 234  | - | <i>rplA</i> | Ribosomal protein L1                                                                           |
| HH0365 | 358098 | 358520 | 141  | - | <i>rplK</i> | Ribosomal protein L11                                                                          |
| HH0366 | 358553 | 359065 | 171  | - | <i>nusG</i> | Transcription termination factor NusG                                                          |
| HH0367 | 359089 | 359268 | 60   | - | <i>secE</i> | Preprotein translocase, subunit SecE                                                           |
| HH0368 | 359399 | 359566 | 56   | - | <i>rpmG</i> | Ribosomal protein L33                                                                          |
| HH0369 | 359584 | 360780 | 399  | - | <i>tufA</i> | Translation elongation factor EF-Tu                                                            |
| HH0370 | 361949 | 362434 | 162  | + |             | Hypothetical protein, predicted membrane-associated                                            |
| HH0371 | 362976 | 363086 | 37   | + |             | Hypothetical protein                                                                           |
| HH0372 | 363192 | 364346 | 385  | + |             | Conserved hypothetical protein, similar to <i>H. pylori</i> HP0624, predicted aminotransferase |
| HH0373 | 364346 | 365662 | 439  | + | <i>murC</i> | UDP-N-acetylmuramate-alanine ligase                                                            |
| HH0374 | 365665 | 366114 | 150  | + |             | Hypothetical protein, predicted membrane-associated                                            |
| HH0375 | 366104 | 368323 | 740  | + | <i>mutS</i> | Mismatch repair ATPase MutS                                                                    |
| HH0376 | 368393 | 369133 | 247  | + |             | Hypothetical protein, predicted membrane-associated                                            |
| HH0377 | 369136 | 369426 | 97   | + |             | Hypothetical protein                                                                           |
| HH0378 | 369448 | 369915 | 156  | - |             | Predicted rRNA methylase (SpoU class), similar to <i>C. jejuni</i> CJ0904c                     |
| HH0379 | 370065 | 371636 | 524  | + | <i>dcuA</i> | Anaerobic C4-dicarboxylate transporter DcuA                                                    |
| HH0380 | 371691 | 372725 | 345  | + | <i>galE</i> | UDP-glucose 4-epimerase                                                                        |
| HH0381 | 372745 | 373500 | 252  | + |             | Hypothetical protein, predicted secreted protein                                               |
| HH0382 | 373514 | 374518 | 335  | + |             | Hypothetical protein                                                                           |
| HH0383 | 374548 | 375918 | 457  | + |             | Hypothetical protein                                                                           |
| HH0384 | 376094 | 376618 | 175  | + |             | Hypothetical protein                                                                           |
| HH0385 | 376621 | 377160 | 180  | + |             | Hypothetical protein, predicted membrane-associated                                            |
| HH0386 | 377153 | 377797 | 215  | + |             | Hypothetical protein                                                                           |
| HH0387 | 377800 | 378360 | 187  | + |             | Hypothetical protein, predicted membrane-associated                                            |

|        |        |        |     |   |              |                                                                                                      |
|--------|--------|--------|-----|---|--------------|------------------------------------------------------------------------------------------------------|
| HH0388 | 378353 | 378730 | 126 | + |              | Hypothetical protein                                                                                 |
| HH0389 | 378733 | 379083 | 117 | + |              | Hypothetical protein, predicted membrane-associated                                                  |
| HH0390 | 379101 | 379643 | 181 | + |              | Hypothetical protein                                                                                 |
| HH0391 | 379627 | 380205 | 193 | + |              | Hypothetical protein, predicted membrane-associated                                                  |
| HH0392 | 380201 | 380677 | 159 | + |              | Hypothetical protein                                                                                 |
| HH0393 | 380691 | 381182 | 164 | + |              | Hypothetical protein, predicted membrane-associated                                                  |
| HH0394 | 381160 | 381519 | 120 | + |              | Hypothetical protein                                                                                 |
| HH0395 | 381507 | 382451 | 315 | - |              | Hypothetical protein                                                                                 |
| HH0396 | 382630 | 384528 | 633 | + | <i>acoE</i>  | Acetyl-CoA synthetase                                                                                |
| HH0397 | 384535 | 385407 | 291 | + | <i>prpB</i>  | Carboxyphosphoenolpyruvate phosphomutase PrpB, involved in propionate metabolism                     |
| HH0398 | 385421 | 386566 | 382 | + | <i>prpC</i>  | Citrate synthase PrpC, involved in propionate metabolism                                             |
| HH0399 | 386603 | 388057 | 485 | + | <i>prpD</i>  | Citrate synthase PrpD, involved in propionate metabolism                                             |
| HH0400 | 388108 | 388620 | 171 | + |              | Hypothetical protein                                                                                 |
| HH0401 | 388741 | 389253 | 171 | - |              | Hypothetical protein                                                                                 |
| HH0402 | 389539 | 389691 | 51  | - |              | Hypothetical protein                                                                                 |
| HH0403 | 389691 | 390569 | 293 | - |              | Hypothetical protein, predicted membrane-associated                                                  |
| HH0404 | 390634 | 390990 | 119 | - |              | Hypothetical protein, predicted membrane-associated                                                  |
| HH0405 | 391032 | 391439 | 136 | - |              | Conserved hypothetical protein, similar to <i>C. jejuni</i> putative acid periplasmic protein CJ0424 |
| HH0406 | 391621 | 391863 | 81  | + |              | Hypothetical protein, predicted membrane-associated                                                  |
| HH0407 | 391929 | 392603 | 225 | + | <i>ureA</i>  | Urease, $\alpha$ subunit                                                                             |
| HH0408 | 392628 | 394334 | 569 | + | <i>ureB</i>  | Urease, $\beta$ subunit                                                                              |
| HH0409 | 394347 | 394856 | 170 | + | <i>ureI</i>  | Urease accessory protein UreI                                                                        |
| HH0410 | 394829 | 395380 | 184 | + | <i>ureE</i>  | Urease accessory protein UreE                                                                        |
| HH0411 | 395380 | 396039 | 220 | + | <i>ureF</i>  | Urease accessory protein UreF                                                                        |
| HH0412 | 396053 | 396652 | 200 | + | <i>ureG</i>  | Urease/hydrogenase-associated predicted GTPases UreG                                                 |
| HH0413 | 396730 | 397407 | 226 | + | <i>ureH</i>  | Urease accessory protein UreH                                                                        |
| HH0414 | 397416 | 398126 | 237 | - | <i>nikE</i>  | Nickel transport ATP-binding protein NikE                                                            |
| HH0415 | 398123 | 399787 | 555 | - | <i>nikD</i>  | Nickel transport permease component NikD                                                             |
| HH0416 | 399787 | 400680 | 298 | - | <i>nikB</i>  | Nickel transport system permease protein NikB                                                        |
| HH0417 | 400800 | 402362 | 521 | - | <i>nikA</i>  | Nickel transport system periplasmic component NikA                                                   |
| HH0418 | 402505 | 404676 | 724 | + |              | Conserved hypothetical protein, similar to <i>P. aeruginosa</i> outer membrane hemin receptor        |
| HH0419 | 404743 | 405534 | 264 | + | <i>proB</i>  | Glutamate 5-kinase                                                                                   |
| HH0420 | 405498 | 406445 | 316 | + | <i>fmt</i>   | Methionyl-tRNA formyltransferase                                                                     |
| HH0421 | 406464 | 407180 | 239 | + | <i>birA</i>  | Biotin operon repressor BirA                                                                         |
| HH0422 | 407194 | 407976 | 261 | + | <i>parA</i>  | ATPases involved in chromosome partitioning ParA                                                     |
| HH0423 | 407985 | 408854 | 290 | + | <i>parB</i>  | Transcriptional regulator involved in chromosome partitioning ParB                                   |
| HH0424 | 408934 | 409356 | 141 | + | <i>atpF</i>  | FoF1-type ATP synthase, subunit B'                                                                   |
| HH0425 | 409369 | 409881 | 171 | + | <i>atpF'</i> | FoF1-type ATP synthase, subunit B                                                                    |
| HH0426 | 409884 | 410405 | 174 | + | <i>atpH</i>  | FoF1-type ATP synthase, delta subunit                                                                |
| HH0427 | 410430 | 411941 | 504 | + | <i>atpA</i>  | FoF1-type ATP synthase, $\alpha$ subunit                                                             |
| HH0428 | 411957 | 412847 | 297 | + | <i>atpG</i>  | FoF1-type ATP synthase, $\gamma$ subunit                                                             |
| HH0429 | 412869 | 414266 | 466 | + | <i>atpD</i>  | FoF1-type ATP synthase, $\beta$ subunit                                                              |
| HH0430 | 414278 | 414670 | 131 | + | <i>atpC</i>  | FoF1-type ATP synthase, $\epsilon$ subunit                                                           |
| HH0431 | 414683 | 415243 | 187 | + |              | Biopolymer transport protein, ExbB-like                                                              |

|        |        |        |      |   |             |                                                                                                    |
|--------|--------|--------|------|---|-------------|----------------------------------------------------------------------------------------------------|
| HH0432 | 415254 | 415646 | 131  | + |             | Biopolymer transport protein ExbD-like                                                             |
| HH0433 | 415651 | 416340 | 230  | + |             | Conserved hypothetical protein, similar to <i>H. pylori</i> HP1127, predicted secreted protein     |
| HH0434 | 416353 | 417609 | 419  | + |             | Acetyl esterase TolB, periplasmic component of the Tol biopolymer transport system                 |
| HH0435 | 417669 | 418127 | 153  | + |             | Conserved hypothetical protein, MotB-family                                                        |
| HH0436 | 418154 | 418996 | 281  | + |             | Conserved hypothetical protein, similar to <i>H. pylori</i> HP1124, predicted secreted protein     |
| HH0437 | 418996 | 419547 | 184  | + | <i>slyD</i> | FKBP-type peptidyl-prolyl cis-trans isomerases 2, rotamase                                         |
| HH0438 | 419734 | 419997 | 88   | + | <i>fliQ</i> | Flagellar basal body protein FliQ                                                                  |
| HH0439 | 420004 | 420792 | 263  | + | <i>murB</i> | UDP-N-acetylmuramate dehydrogenase                                                                 |
| HH0440 | 421336 | 421731 | 132  | + | <i>secG</i> | Membrane protein SecG involved in protein secretion                                                |
| HH0441 | 421749 | 422303 | 185  | + | <i>frr</i>  | Ribosome releasing factor                                                                          |
| HH0442 | 422309 | 424120 | 604  | + | <i>thrS</i> | Threonyl-tRNA synthetase                                                                           |
| HH0443 | 424120 | 424641 | 174  | + | <i>infC</i> | Translation initiation factor IF3                                                                  |
| HH0444 | 424616 | 424858 | 81   | + | <i>rpml</i> | Ribosomal protein L35                                                                              |
| HH0445 | 424944 | 425294 | 117  | + | <i>rplT</i> | Ribosomal protein L20                                                                              |
| HH0446 | 425458 | 426612 | 385  | + |             | Conserved hypothetical protein, similar to <i>H. pylori</i> HP1044, predicted membrane-associated  |
| HH0447 | 426587 | 427249 | 221  | - |             | Hypothetical protein                                                                               |
| HH0448 | 427249 | 427419 | 57   | - |             | Hypothetical protein, predicted membrane-associated                                                |
| HH0449 | 427437 | 428129 | 231  | - | <i>hisI</i> | Phosphoribosyl-AMP cyclohydrolase/ phosphoribosyl-ATP pyrophosphohydrolase                         |
| HH0450 | 428137 | 429231 | 365  | - |             | Conserved hypothetical protein, similar to <i>H. pylori</i> JHP0233, predicted membrane-associated |
| HH0451 | 429236 | 430165 | 310  | - | <i>ilvE</i> | Branched-chain-amino-acid aminotransferase IlvE                                                    |
| HH0452 | 430301 | 431770 | 490  | - |             | Conserved hypothetical protein, similar to <i>C. jejuni</i> CJ1249                                 |
| HH0453 | 432151 | 434973 | 941  | + | <i>ftsK</i> | DNA segregation ATPase FtsK/SpoIIIE                                                                |
| HH0454 | 435032 | 436462 | 477  | + | <i>htrA</i> | Serine protease, similar to <i>C. jejuni</i> HtrA                                                  |
| HH0455 | 436487 | 437320 | 278  | + | <i>cheR</i> | Chemotaxis protein methyltransferase CheR                                                          |
| HH0456 | 437327 | 438037 | 237  | + | <i>cheB</i> | Chemotaxis protein methylesterase CheB                                                             |
| HH0457 | 438249 | 438494 | 82   | - |             | Conserved hypothetical protein, similar to <i>H. pylori</i> HP1436, predicted membrane-associated  |
| HH0458 | 438507 | 441509 | 1001 | - | <i>mfd</i>  | Transcription-repair coupling factor                                                               |
| HH0459 | 441539 | 441955 | 139  | - |             | Conserved hypothetical protein, similar to <i>H. pylori</i> HP1542                                 |
| HH0460 | 441916 | 442812 | 299  | - |             | Membrane proteins related to metalloendopeptidases, similar to <i>H. pylori</i> HP1543             |
| HH0461 | 442819 | 443691 | 291  | - | <i>tagE</i> | Conserved hypothetical protein, similar to <i>V. cholerae</i> TagE (VC0843)                        |
| HH0462 | 443695 | 444900 | 402  | - | <i>folC</i> | Folylpolyglutamate synthase                                                                        |
| HH0463 | 444900 | 445931 | 344  | - |             | Hypothetical protein                                                                               |
| HH0464 | 445909 | 446418 | 170  | - |             | Conserved hypothetical protein, similar to <i>H. pylori</i> HP1546                                 |
| HH0465 | 446421 | 448910 | 830  | - | <i>leuS</i> | Leucyl-tRNA synthetase                                                                             |
| HH0466 | 449135 | 450373 | 413  | + | <i>alr</i>  | Alanine racemase                                                                                   |
| HH0467 | 450486 | 452690 | 735  | + | <i>flhA</i> | Flagellar basal body protein FlhA                                                                  |
| HH0468 | 452702 | 453826 | 375  | + |             | Conserved hypothetical protein, similar to <i>H. pylori</i> HP1042                                 |
| HH0469 | 453826 | 454092 | 89   | + |             | Hypothetical protein                                                                               |
| HH0470 | 454156 | 454728 | 191  | + | <i>purN</i> | GAR transformylase PurN                                                                            |
| HH0471 | 454728 | 455909 | 394  | + | <i>kefB</i> | Conserved hypothetical protein, similar to <i>H. pylori</i> ion-channel HP1183                     |
| HH0472 | 455912 | 457306 | 465  | + |             | Sodium-dependent transporter (SNF family), similar to <i>C. jejuni</i> CJ0601c                     |
| HH0473 | 457376 | 459148 | 591  | + |             | Periplasmic binding component of ABC-type transport system, similar to <i>H. pylori</i> HP1252     |
| HH0474 | 459280 | 461034 | 585  | + |             | Predicted ATPase (AAA-family), similar to <i>C. jejuni</i> CJ0377                                  |
| HH0475 | 461338 | 461646 | 103  | + |             | Hypothetical protein, predicted secreted protein                                                   |

|        |        |        |     |   |               |                                                                                                                      |
|--------|--------|--------|-----|---|---------------|----------------------------------------------------------------------------------------------------------------------|
| HH0476 | 461646 | 462071 | 142 | + |               | Hypothetical protein, predicted secreted protein                                                                     |
| HH0477 | 462353 | 462676 | 108 | + |               | Hypothetical protein                                                                                                 |
| HH0478 | 462752 | 463798 | 349 | + |               | Predicted ATPase, similar to <i>H. pylori</i> HP1079                                                                 |
| HH0479 | 464216 | 464356 | 47  | + |               | Hypothetical protein                                                                                                 |
| HH0480 | 464383 | 464478 | 32  | + |               | Hypothetical protein                                                                                                 |
| HH0481 | 464455 | 466539 | 695 | - |               | Conserved hypothetical protein, similar to methyl-accepting chemotaxis proteins, similar to <i>C. jejuni</i> CJ1506c |
| HH0482 | 466710 | 467771 | 354 | + |               | Predicted ATPase (AAA-family), similar to <i>H. pylori</i> HP1321                                                    |
| HH0483 | 467788 | 469155 | 456 | - | <i>purH</i>   | AICAR transformylase PurH                                                                                            |
| HH0484 | 469382 | 470257 | 292 | + |               | Conserved hypothetical protein, similar to <i>C. jejuni</i> CJ1132c                                                  |
| HH0485 | 470499 | 471149 | 217 | + | <i>hisH</i>   | Glutamine amidotransferase HisH                                                                                      |
| HH0486 | 471235 | 472167 | 311 | + | <i>trxB_1</i> | Thioredoxin reductase TrxB                                                                                           |
| HH0487 | 472213 | 472977 | 255 | + | <i>dapB</i>   | Dihydrodipicolinate reductase                                                                                        |
| HH0488 | 473048 | 474469 | 474 | + | <i>purF</i>   | Glutamine phosphoribosylpyrophosphate amidotransferase PurF                                                          |
| HH0489 | 474482 | 475441 | 320 | + |               | Conserved hypothetical protein, similar to <i>E. coli</i> YhcC                                                       |
| HH0490 | 475479 | 476339 | 287 | - |               | Conserved hypothetical protein, similar to <i>H. pylori</i> putative periplasmic protein                             |
| HH0491 | 476360 | 477607 | 416 | - | <i>pgi</i>    | Glucose-6-phosphate isomerase                                                                                        |
| HH0492 | 477617 | 478597 | 327 | - | <i>gap_2</i>  | Glyceraldehyde-3-phosphate dehydrogenase                                                                             |
| HH0493 | 478615 | 478719 | 35  | - |               | Hypothetical protein                                                                                                 |
| HH0494 | 478827 | 479723 | 299 | - |               | Hypothetical protein                                                                                                 |
| HH0495 | 479807 | 481897 | 697 | - | <i>ppk</i>    | Polyphosphate kinase                                                                                                 |
| HH0496 | 482101 | 482610 | 170 | + |               | Hypothetical protein, predicted secreted protein                                                                     |
| HH0497 | 482701 | 484542 | 614 | + | <i>yigC</i>   | Conserved hypothetical protein, similar to <i>C. jejuni</i> CJ0546                                                   |
| HH0498 | 484628 | 485053 | 142 | + | <i>rplM</i>   | Ribosomal protein L13                                                                                                |
| HH0499 | 485065 | 485451 | 129 | + | <i>rpsI</i>   | Ribosomal protein S9                                                                                                 |
| HH0500 | 485552 | 486082 | 177 | + | <i>ycbL</i>   | Predicted hydrolase, similar to <i>C. jejuni</i> CJ0809c                                                             |
| HH0501 | 486136 | 486903 | 256 | + | <i>motA</i>   | Flagellar motor component MotA                                                                                       |
| HH0502 | 486926 | 487678 | 251 | + | <i>motB</i>   | Flagellar motor component MotB                                                                                       |
| HH0503 | 487742 | 487861 | 40  | + |               | Hypothetical protein, may become fused with HH0504 due to slipped strand mispairing                                  |
| HH0504 | 487930 | 488163 | 78  | + |               | Hypothetical protein, may become fused with HH0503 due to slipped strand mispairing                                  |
| HH0505 | 488422 | 488628 | 69  | + |               | Hypothetical protein, predicted membrane-associated                                                                  |
| HH0506 | 488675 | 489682 | 336 | - | <i>ruvB</i>   | Holliday junction DNA helicase RuvB                                                                                  |
| HH0507 | 489766 | 490557 | 264 | - | <i>panB</i>   | Ketopantoate hydroxymethyltransferase                                                                                |
| HH0508 | 490587 | 490904 | 106 | - |               | Predicted efflux protein, similar to <i>C. jejuni</i> CJ1174                                                         |
| HH0509 | 490908 | 491261 | 118 | - |               | Predicted efflux protein                                                                                             |
| HH0510 | 491261 | 492136 | 292 | - | <i>lgt</i>    | Prolipoprotein diacylglyceryltransferase                                                                             |
| HH0511 | 492142 | 492459 | 106 | - |               | Hypothetical protein                                                                                                 |
| HH0512 | 492522 | 492995 | 158 | - |               | Hypothetical protein                                                                                                 |
| HH0513 | 493014 | 494609 | 532 | - |               | Conserved hypothetical protein, similar to methyl-accepting chemotaxis proteins                                      |
| HH0514 | 494640 | 495227 | 196 | - | <i>ruvA</i>   | Holliday junction DNA helicase RuvA                                                                                  |
| HH0515 | 495286 | 497139 | 618 | - |               | Hypothetical protein                                                                                                 |
| HH0516 | 497317 | 498696 | 460 | + |               | Conserved hypothetical protein, similar to <i>E. coli</i> MviN, predicted membrane-associated                        |
| HH0517 | 498696 | 500159 | 488 | + | <i>cysS</i>   | CysteinyI-tRNA synthetase                                                                                            |
| HH0518 | 500167 | 501024 | 286 | - | <i>ribF</i>   | Riboflavin kinase/FAD synthase RibF                                                                                  |
| HH0519 | 500996 | 501718 | 41  | - |               | Conserved hypothetical protein, similar to <i>H. pylori</i> HP1086                                                   |

|        |        |        |     |   |             |                                                                                                |
|--------|--------|--------|-----|---|-------------|------------------------------------------------------------------------------------------------|
| HH0520 | 501730 | 502242 | 171 | - |             | Hypothetical protein                                                                           |
| HH0521 | 502410 | 503300 | 297 | + | <i>pyrB</i> | Aspartate carbamoyltransferase                                                                 |
| HH0522 | 503427 | 504734 | 436 | + |             | Conserved hypothetical protein, similar to <i>H. pylori</i> HP1083, predicted secreted protein |
| HH0523 | 504844 | 505695 | 284 | + | <i>cdsA</i> | CDP-diglyceride synthetase CdsA                                                                |
| HH0524 | 505702 | 506808 | 369 | + | <i>dxr</i>  | 1-deoxy-D-xylulose 5-phosphate reductoisomerase                                                |
| HH0525 | 506966 | 507601 | 212 | + |             | Conserved hypothetical protein, similar to <i>H. pylori</i> Hop-family proteins                |
| HH0526 | 507605 | 507697 | 31  | + |             | Hypothetical protein                                                                           |
| HH0527 | 507717 | 509258 | 514 | + | <i>thrC</i> | Threonine synthase                                                                             |
| HH0528 | 509346 | 509837 | 164 | + | <i>purE</i> | NCAIR mutase PurE                                                                              |
| HH0529 | 509850 | 510329 | 160 | + |             | Conserved hypothetical protein, similar to <i>C. jejuni</i> Cj0703                             |
| HH0530 | 510329 | 511246 | 306 | + |             | Conserved hypothetical protein, similar to <i>C. jejuni</i> CJ0703                             |
| HH0531 | 511258 | 512151 | 298 | + | <i>glyQ</i> | Glycyl-tRNA synthetase, $\alpha$ subunit                                                       |
| HH0532 | 512154 | 514205 | 684 | + |             | Conserved hypothetical protein, similar to <i>C. jejuni</i> putative periplasmic protein       |
| HH0533 | 514218 | 514901 | 228 | + |             | Hypothetical protein                                                                           |
| HH0534 | 515008 | 516849 | 614 | + |             | Conserved hypothetical protein, predicted ribonuclease, similar to <i>H. pylori</i> HP1248     |
| HH0535 | 517329 | 518336 | 336 | + |             | Conserved hypothetical protein, similar to <i>H. pylori</i> HP1247                             |
| HH0536 | 518434 | 518844 | 137 | + | <i>rpsF</i> | Ribosomal protein S6                                                                           |
| HH0537 | 518865 | 519374 | 170 | + | <i>ssb</i>  | Single-stranded DNA-binding protein                                                            |
| HH0538 | 519471 | 519647 | 59  | + | <i>rpsR</i> | Ribosomal protein S18                                                                          |
| HH0539 | 519753 | 521813 | 687 | + |             | Hypothetical protein, predicted membrane-associated                                            |
| HH0540 | 521952 | 522719 | 256 | + |             | Hypothetical protein                                                                           |
| HH0541 | 522727 | 522996 | 90  | - | <i>rpsO</i> | Ribosomal protein S15                                                                          |
| HH0542 | 523091 | 523234 | 48  | - |             | Hypothetical protein                                                                           |
| HH0543 | 523408 | 523560 | 51  | - |             | Hypothetical protein                                                                           |
| HH0544 | 523702 | 523923 | 74  | - |             | Hypothetical protein                                                                           |
| HH0545 | 523981 | 525849 | 623 | - | <i>rpoD</i> | RNA polymerase $\sigma$ 70 factor                                                              |
| HH0546 | 525975 | 526919 | 315 | - | <i>porB</i> | Pyruvate:ferredoxin oxidoreductase $\beta$ subunit                                             |
| HH0547 | 526933 | 528150 | 406 | - | <i>porA</i> | Pyruvate:ferredoxin oxidoreductase $\alpha$ subunit                                            |
| HH0548 | 528165 | 528572 | 136 | - | <i>porD</i> | Pyruvate:ferredoxin oxidoreductase delta subunit                                               |
| HH0549 | 528595 | 529152 | 186 | - | <i>porG</i> | Pyruvate:ferredoxin oxidoreductase $\gamma$ subunit                                            |
| HH0550 | 529248 | 529805 | 186 | - |             | Hypothetical protein                                                                           |
| HH0551 | 529805 | 530215 | 137 | - |             | Hypothetical protein                                                                           |
| HH0552 | 530259 | 530387 | 43  | - |             | Hypothetical protein                                                                           |
| HH0553 | 530409 | 531095 | 229 | - |             | Hypothetical protein                                                                           |
| HH0554 | 531323 | 531901 | 193 | - |             | Hypothetical protein, predicted secreted protein                                               |
| HH0555 | 532010 | 533854 | 615 | - |             | Hypothetical protein, predicted membrane-associated                                            |
| HH0556 | 533869 | 533958 | 30  | - |             | Hypothetical protein                                                                           |
| HH0557 | 534065 | 535195 | 377 | + |             | Hypothetical protein                                                                           |
| HH0558 | 535467 | 536462 | 332 | + | <i>trpS</i> | Tryptophanyl-tRNA synthetase                                                                   |
| HH0559 | 536462 | 537739 | 426 | + |             | Hypothetical protein, predicted secreted protein                                               |
| HH0560 | 537878 | 539314 | 479 | + | <i>glnA</i> | Glutamine synthase                                                                             |
| HH0561 | 539343 | 539819 | 159 | - |             | Conserved hypothetical protein, similar to <i>C. jejuni</i> CJ0829c                            |
| HH0562 | 540133 | 540402 | 90  | + |             | Hypothetical protein                                                                           |
| HH0563 | 540432 | 541409 | 326 | - | <i>yurV</i> | NifU-like protein                                                                              |

|        |        |        |     |   |               |                                                                                                                    |
|--------|--------|--------|-----|---|---------------|--------------------------------------------------------------------------------------------------------------------|
| HH0564 | 541612 | 542775 | 388 | - | <i>nifS</i>   | Cysteine desulfurase                                                                                               |
| HH0565 | 542919 | 544292 | 458 | - | <i>flil</i>   | Flagellum-specific ATP synthase Flil                                                                               |
| HH0566 | 544365 | 545690 | 442 | + | <i>tig</i>    | FKBP-type peptidyl-prolyl cis-trans isomerase (trigger factor)                                                     |
| HH0567 | 545690 | 546277 | 196 | + | <i>clpP</i>   | Endopeptidase ClpP                                                                                                 |
| HH0568 | 546302 | 547450 | 383 | + |               | Hypothetical protein                                                                                               |
| HH0569 | 547401 | 547943 | 181 | + | <i>def</i>    | N-formylmethionyl-tRNA deformylase                                                                                 |
| HH0570 | 548037 | 549473 | 479 | + |               | Competence protein ComM                                                                                            |
| HH0571 | 549501 | 549779 | 93  | + |               | Conserved hypothetical protein, similar to <i>C. jejuni</i> CJ0510c                                                |
| HH0572 | 549795 | 550559 | 255 | - |               | Conserved hypothetical protein, similar to <i>C. jejuni</i> CJ1050c, Sir2 family protein                           |
| HH0573 | 550613 | 552220 | 536 | - |               | Hypothetical protein, predicted membrane-associated                                                                |
| HH0574 | 552229 | 552846 | 206 | - |               | Hypothetical protein                                                                                               |
| HH0575 | 552961 | 553560 | 200 | - |               | Hypothetical protein, predicted secreted protein                                                                   |
| HH0576 | 553584 | 554846 | 421 | - | <i>murA</i>   | UDP-N-acetylglucosamine enolpyruvyl transferase MurA (MurZ)á                                                       |
| HH0577 | 554866 | 555270 | 135 | - |               | Conserved hypothetical protein, similar to <i>H. pylori</i> JHP0592, predicted secreted protein                    |
| HH0578 | 555266 | 556015 | 250 | - | <i>galU</i>   | UTP- glucose-1-phosphate uridylyltransferase                                                                       |
| HH0579 | 555999 | 556106 | 36  | + |               | Hypothetical protein                                                                                               |
| HH0580 | 556109 | 557734 | 542 | - |               | Conserved hypothetical protein, similar to <i>C. jejuni</i> putative secreted transglycosylase CJ0843c             |
| HH0581 | 557759 | 558055 | 99  | - |               | Conserved hypothetical protein, similar to <i>C. jejuni</i> integral membrane protein CJ0844c                      |
| HH0582 | 558084 | 559406 | 441 | - | <i>gltX_2</i> | Glutamyl-tRNA synthetase                                                                                           |
| HH0583 | 559409 | 559975 | 189 | - |               | Conserved hypothetical protein, similar to <i>H. pylori</i> JHP0349                                                |
| HH0584 | 560485 | 560955 | 157 | + |               | Hypothetical protein                                                                                               |
| HH0585 | 560964 | 562517 | 518 | - |               | Conserved hypothetical protein, predicted transporter protein                                                      |
| HH0586 | 562622 | 564706 | 695 | + |               | Cation transport ATPase, similar to <i>H. pylori</i> CadA (JHP0727)                                                |
| HH0587 | 564794 | 566167 | 458 | - |               | Conserved hypothetical protein, similar to <i>C. jejuni</i> CJ1209                                                 |
| HH0588 | 566292 | 566993 | 234 | - |               | Conserved hypothetical protein, similar to <i>C. jejuni</i> CJ1208, possible 5-formyltetrahydrofolate cyclo-ligase |
| HH0589 | 566971 | 567657 | 229 | + |               | Conserved hypothetical protein, similar to <i>C. jejuni</i> putative signal recognition particle protein           |
| HH0590 | 567657 | 568535 | 293 | + | <i>ftsY</i>   | Signal recognition particle-docking GTPase FtsY                                                                    |
| HH0591 | 568538 | 569881 | 448 | + |               | Predicted ATP-dependent serine protease (Sms family), RadA-like                                                    |
| HH0592 | 570138 | 571511 | 458 | + |               | Conserved hypothetical protein, similar to <i>C. jejuni</i> possible sugar transferase                             |
| HH0593 | 571788 | 572096 | 103 | - | <i>atpE</i>   | ATP synthase F0, subunit c (AtpE)                                                                                  |
| HH0594 | 572207 | 574333 | 709 | - | <i>pnp</i>    | Polyribonucleotide nucleotidyltransferase                                                                          |
| HH0595 | 574336 | 574998 | 221 | - |               | Conserved hypothetical protein, similar to <i>H. pylori</i> HP1214                                                 |
| HH0596 | 575015 | 577144 | 710 | - |               | Organic solvent tolerance protein, Imp/OstA-like                                                                   |
| HH0597 | 577225 | 577695 | 157 | - |               | Conserved hypothetical protein, similar to <i>C. jejuni</i> CJ1251, predicted membrane-associated                  |
| HH0598 | 577695 | 578972 | 426 | - | <i>purD</i>   | GAR synthetase PurD                                                                                                |
| HH0599 | 579221 | 579973 | 251 | - |               | Hypothetical protein                                                                                               |
| HH0600 | 580066 | 580164 | 33  | + |               | Hypothetical protein                                                                                               |
| HH0601 | 580222 | 580965 | 248 | - | <i>truA</i>   | TRNA pseudouridine synthase                                                                                        |
| HH0602 | 580968 | 581984 | 339 | - |               | Conserved hypothetical protein, similar to <i>H. pylori</i> JHP1018, predicted membrane-associated                 |
| HH0603 | 581987 | 582631 | 215 | - | <i>hopD</i>   | Type IV prepilin peptidase HopD                                                                                    |
| HH0604 | 582650 | 583303 | 218 | - | <i>pcm</i>    | L-isoaspartate protein carboxymethyltransferase type II                                                            |
| HH0605 | 583306 | 584040 | 245 | - |               | Conserved hypothetical protein, similar to Aquifex aeolicus AQ_103                                                 |
| HH0606 | 584033 | 585079 | 349 | - | <i>nrdB</i>   | Ribonucleoside diphosphate reductase, β subunit                                                                    |
| HH0607 | 585191 | 585334 | 48  | - |               | Hypothetical protein                                                                                               |

|        |        |        |      |   |               |                                                                                                                                |
|--------|--------|--------|------|---|---------------|--------------------------------------------------------------------------------------------------------------------------------|
| HH0608 | 585381 | 587267 | 629  | - | <i>dxs</i>    | 1-deoxyxylulose-5-phosphate synthase                                                                                           |
| HH0609 | 587296 | 588126 | 277  | - | <i>fliH</i>   | Flagellar assembly protein FliH                                                                                                |
| HH0610 | 588116 | 589144 | 343  | - | <i>fliG</i>   | Flagellar motor switch protein FliG                                                                                            |
| HH0611 | 589163 | 590872 | 570  | - | <i>fliF</i>   | Flagellar basal body M-ring protein FliF                                                                                       |
| HH0612 | 590885 | 591994 | 370  | - | <i>hisC</i>   | Histidinol-phosphate aminotransferase                                                                                          |
| HH0613 | 592187 | 593632 | 482  | + | <i>glmM</i>   | Phosphohexosemutase                                                                                                            |
| HH0614 | 593645 | 594673 | 343  | + | <i>pyrC_2</i> | Dihydroorotase                                                                                                                 |
| HH0615 | 594696 | 595808 | 371  | - | <i>hemN_2</i> | Oxygen-independent coproporphyrinogen III oxidase                                                                              |
| HH0616 | 595846 | 595953 | 36   | + |               | Hypothetical protein                                                                                                           |
| HH0617 | 595982 | 596413 | 144  | + |               | Conserved hypothetical protein, similar to <i>C. jejuni</i> putative NTPase CJ0581                                             |
| HH0618 | 596478 | 597680 | 401  | + | <i>lysC</i>   | Aspartokinase, $\alpha$ and $\beta$ subunits                                                                                   |
| HH0619 | 597631 | 598242 | 204  | + |               | Hypothetical protein                                                                                                           |
| HH0620 | 598268 | 598885 | 206  | + | <i>holB</i>   | DNA polymerase III subunit delta'                                                                                              |
| HH0621 | 598966 | 600012 | 349  | + | <i>folP</i>   | Dihydropteroate synthase                                                                                                       |
| HH0622 | 600012 | 600995 | 328  | + |               | Hypothetical protein                                                                                                           |
| HH0623 | 601070 | 602371 | 434  | + |               | Conserved hypothetical protein, similar to <i>H. pylori</i> putative resistance-nodulation-division efflux system protein HefF |
| HH0624 | 602371 | 603453 | 361  | + |               | Conserved hypothetical protein, similar to <i>H. pylori</i> putative resistance-nodulation-division efflux system protein HefE |
| HH0625 | 603456 | 606518 | 1021 | + |               | Conserved hypothetical protein, similar to <i>H. pylori</i> putative resistance-nodulation-division efflux system protein HefD |
| HH0626 | 606525 | 607490 | 322  | - |               | Conserved hypothetical protein, similar to <i>C. jejuni</i> CJ0504c                                                            |
| HH0627 | 607486 | 608577 | 364  | - | <i>wlaK</i>   | Conserved hypothetical protein, similar to degT family amidotransferases                                                       |
| HH0628 | 608633 | 609133 | 167  | - | <i>aroK</i>   | Shikimate kinase                                                                                                               |
| HH0629 | 609139 | 609753 | 205  | - |               | Conserved hypothetical protein, similar to <i>H. pylori</i> JHP0144, predicted secreted protein                                |
| HH0630 | 609753 | 610016 | 88   | - |               | Conserved hypothetical protein, similar to <i>C. jejuni</i> CJ1671c, predicted membrane-associated                             |
| HH0631 | 610034 | 611308 | 425  | - | <i>eno</i>    | Enolase                                                                                                                        |
| HH0632 | 611338 | 611553 | 72   | - |               | Hypothetical protein                                                                                                           |
| HH0633 | 611575 | 612609 | 345  | - | <i>recA</i>   | RecA protein                                                                                                                   |
| HH0634 | 612710 | 613564 | 285  | + |               | Conserved hypothetical protein, similar to <i>C. jejuni</i> CJ1674                                                             |
| HH0635 | 613580 | 614644 | 355  | - |               | Conserved hypothetical protein, similar to <i>H. pylori</i> HP0567, predicted membrane-associated                              |
| HH0636 | 614897 | 616186 | 430  | + | <i>metY</i>   | O-acetylhomoserine (thiol)-lyase MetY                                                                                          |
| HH0637 | 616198 | 617076 | 293  | + | <i>metA</i>   | Homoserine O-succinyltransferase                                                                                               |
| HH0638 | 617111 | 617944 | 278  | + |               | Conserved hypothetical protein, similar to <i>C. jejuni</i> CJ0705                                                             |
| HH0639 | 617980 | 618753 | 258  | + |               | Conserved hypothetical protein, similar to <i>H. pylori</i> HP0958                                                             |
| HH0640 | 618784 | 620037 | 418  | + | <i>waaA</i>   | 3-Deoxy-D-manno-octulosonic-acid transferase                                                                                   |
| HH0641 | 620040 | 620774 | 245  | + |               | Ribosomal pseudouridine synthase                                                                                               |
| HH0642 | 620783 | 621364 | 194  | + |               | Hypothetical protein                                                                                                           |
| HH0643 | 621385 | 622275 | 297  | - |               | Hypothetical protein, predicted secreted protein                                                                               |
| HH0644 | 622356 | 623693 | 446  | - | <i>kfiD</i>   | UDP-glucose 6-dehydrogenase                                                                                                    |
| HH0645 | 623732 | 624268 | 179  | - |               | Hypothetical protein                                                                                                           |
| HH0646 | 624467 | 624742 | 92   | - | <i>fdxA</i>   | Ferredoxin                                                                                                                     |
| HH0647 | 624954 | 625889 | 312  | + |               | Nucleotide sugar dehydratase                                                                                                   |
| HH0648 | 625889 | 626899 | 337  | + |               | Conserved hypothetical protein, similar to <i>Dichelobacter nodosus</i> lipopolysaccharide biosynthesis protein LpsA           |
| HH0649 | 626956 | 628728 | 591  | - | <i>lldP</i>   | L-lactate permease                                                                                                             |
| HH0650 | 629022 | 629750 | 243  | + |               | Conserved hypothetical protein, similar to <i>H. pylori</i> JHP0127, predicted secreted protein                                |
| HH0651 | 629756 | 631192 | 479  | + |               | Conserved hypothetical protein containing a ferredoxin-like domain, similar to <i>H. pylori</i> HP0138                         |

|        |        |        |     |   |             |                                                                                                      |
|--------|--------|--------|-----|---|-------------|------------------------------------------------------------------------------------------------------|
| HH0652 | 631188 | 631841 | 218 | + |             | Conserved hypothetical protein, similar to <i>H. pylori</i> JHP0125                                  |
| HH0653 | 631855 | 632259 | 135 | + | <i>modE</i> | Conserved hypothetical protein, possible molybdenum transport protein ModE                           |
| HH0654 | 632336 | 633106 | 257 | + | <i>modA</i> | Molybdenum-binding periplasmic protein ModA                                                          |
| HH0655 | 633131 | 633544 | 138 | + |             | Hypothetical protein                                                                                 |
| HH0656 | 633547 | 634221 | 225 | + | <i>modB</i> | Molybdenum ABC transporter permease component ModB                                                   |
| HH0657 | 634221 | 635108 | 296 | + | <i>modC</i> | Molybdenum ABC transporter ATP-binding component ModC                                                |
| HH0658 | 635119 | 636438 | 440 | - |             | Conserved hypothetical protein, similar to <i>C. jejuni</i> CJ0701, predicted protease               |
| HH0659 | 636441 | 637094 | 218 | - |             | Conserved hypothetical protein, similar to <i>H. pylori</i> JHP0156                                  |
| HH0660 | 637224 | 638321 | 366 | - | <i>prfB</i> | Peptide chain release factor 2                                                                       |
| HH0661 | 638450 | 640726 | 759 | - |             | Conserved hypothetical protein, similar to <i>H. pylori</i> HP0839, predicted outer membrane protein |
| HH0662 | 640901 | 642034 | 378 | - | <i>ansB</i> | L-asparaginase                                                                                       |
| HH0663 | 642113 | 643987 | 625 | - | <i>dnaK</i> | Heat shock protein DnaK                                                                              |
| HH0664 | 644012 | 644566 | 185 | - | <i>grpE</i> | Heat shock protein GrpE                                                                              |
| HH0665 | 644591 | 645382 | 264 | - | <i>hrcA</i> | Transcriptional regulator of heat shock genes HrcA                                                   |
| HH0666 | 645624 | 645722 | 33  | + |             | Hypothetical protein                                                                                 |
| HH0667 | 645722 | 646342 | 207 | + |             | Conserved hypothetical protein, similar to <i>H. pylori</i> HP0112                                   |
| HH0668 | 646362 | 647726 | 455 | + |             | Conserved hypothetical protein, predicted peptidase                                                  |
| HH0669 | 647879 | 648760 | 294 | + | <i>argC</i> | N-acetyl- $\gamma$ -glutamyl-phosphate reductase                                                     |
| HH0670 | 648773 | 649675 | 301 | + |             | Conserved hypothetical protein, similar to <i>H. pylori</i> JHP0987                                  |
| HH0671 | 649679 | 650626 | 316 | + |             | Chemotaxis signal transduction protein CheV, similar to <i>H. pylori</i> HP0393 (CheV3)              |
| HH0672 | 650672 | 653026 | 785 | + | <i>cheA</i> | Chemotaxis protein histidine kinase CheA                                                             |
| HH0673 | 653031 | 653519 | 163 | + | <i>cheW</i> | Chemotaxis signal transduction response regulator CheW                                               |
| HH0674 | 653614 | 654438 | 275 | - |             | Conserved hypothetical protein, similar to <i>C. jejuni</i> CJ0282                                   |
| HH0675 | 655154 | 656584 | 477 | + |             | Conserved hypothetical protein, probable mannose-1-phosphate guanylyltransferase ManC                |
| HH0676 | 656587 | 657762 | 392 | + |             | Conserved hypothetical protein, similar to <i>H. pylori</i> HP0421, predicted glycosyl transferase   |
| HH0677 | 657892 | 658302 | 137 | + | <i>ndk</i>  | Nucleoside diphosphate kinase                                                                        |
| HH0678 | 658306 | 658656 | 117 | + |             | Conserved hypothetical protein, similar to <i>C. jejuni</i> small hydrophobic protein                |
| HH0679 | 658674 | 658820 | 49  | + | <i>rpmF</i> | Ribosomal protein L32                                                                                |
| HH0680 | 658845 | 659843 | 333 | + | <i>plsX</i> | Fatty acid/phospholipid biosynthesis enzyme PlsX                                                     |
| HH0681 | 659856 | 660851 | 332 | + | <i>fabH</i> | 3-oxoacyl-[acyl-carrier-protein] synthase III                                                        |
| HH0682 | 660935 | 663175 | 747 | + |             | Conserved hypothetical protein, similar to <i>H. pylori</i> HP0791, probable cation transport ATPase |
| HH0683 | 663198 | 663407 | 70  | + |             | Conserved hypothetical protein, similar to <i>H. pylori</i> copper ion binding protein HP1073        |
| HH0684 | 663394 | 665106 | 571 | + | <i>msbA</i> | Multidrug resistance protein MsbA                                                                    |
| HH0685 | 665272 | 666039 | 256 | + | <i>frdC</i> | Fumarate reductase, cytochrome B component FrdC                                                      |
| HH0686 | 666043 | 668016 | 658 | + | <i>frdA</i> | Fumarate reductase, flavoprotein component FrdA                                                      |
| HH0687 | 668019 | 668759 | 247 | + | <i>frdB</i> | Fumarate reductase, iron-sulfur protein FrdB                                                         |
| HH0688 | 668814 | 670373 | 520 | + |             | Conserved hypothetical protein, similar to <i>H. pylori</i> HP0190, predicted secreted protein       |
| HH0689 | 670397 | 670783 | 129 | - |             | Conserved hypothetical protein                                                                       |
| HH0690 | 670770 | 670973 | 68  | - |             | Conserved hypothetical protein, similar to <i>C. jejuni</i> CJ1047c                                  |
| HH0691 | 670976 | 672337 | 454 | - | <i>glmU</i> | UDP-N-acetylglucosamine pyrophosphorylase                                                            |
| HH0692 | 672436 | 673230 | 265 | + | <i>fliP</i> | Flagellar basal body protein FliP                                                                    |
| HH0693 | 673245 | 674456 | 404 | + | <i>trmA</i> | TRNA (uracil-5-)-methyltransferase TrmA                                                              |
| HH0694 | 674465 | 675634 | 390 | - |             | Conserved hypothetical protein, similar to <i>C. jejuni</i> CJ1241, possible permease                |
| HH0695 | 675666 | 676373 | 236 | - |             | Hypothetical protein                                                                                 |



|        |        |        |      |   |             |                                                                                                                     |
|--------|--------|--------|------|---|-------------|---------------------------------------------------------------------------------------------------------------------|
| HH0696 | 676571 | 677362 | 264  | + |             | Conserved hypothetical protein, similar to <i>H. pylori</i> JHP0604                                                 |
| HH0697 | 677368 | 678450 | 361  | + |             | Conserved hypothetical protein, similar to <i>H. pylori</i> HP0660, predicted secreted protein                      |
| HH0698 | 678422 | 678865 | 148  | + | <i>rnhA</i> | Ribonuclease HI                                                                                                     |
| HH0699 | 678861 | 679580 | 240  | + | <i>rnc</i>  | Ribonuclease III                                                                                                    |
| HH0700 | 679580 | 680653 | 358  | + | <i>aroC</i> | Chorismate synthase                                                                                                 |
| HH0701 | 680733 | 682073 | 447  | + | <i>gatA</i> | Glu-tRNA <sup>Gln</sup> amidotransferase, subunit A                                                                 |
| HH0702 | 682096 | 683538 | 481  | + | <i>guaB</i> | Inosinic acid dehydrogenase GuaB                                                                                    |
| HH0703 | 683552 | 683797 | 82   | + |             | Hypothetical protein                                                                                                |
| HH0704 | 683806 | 684579 | 258  | + | <i>fliR</i> | Flagellar biosynthetic protein FliR                                                                                 |
| HH0705 | 684587 | 685150 | 188  | - |             | Conserved hypothetical protein, similar to <i>H. pylori</i> HP0323, predicted endonuclease                          |
| HH0706 | 685229 | 687040 | 604  | + |             | Conserved hypothetical protein, similar to <i>C. jejuni</i> CJ1178c                                                 |
| HH0707 | 687043 | 687642 | 200  | + | <i>gmk</i>  | Guanylate kinase                                                                                                    |
| HH0708 | 687718 | 687963 | 82   | + |             | Component of Sec-independent protein secretion pathway TatA, similar to <i>C. jejuni</i> CJ1176c                    |
| HH0709 | 687966 | 689609 | 548  | + | <i>argS</i> | Arginyl-tRNA synthetase                                                                                             |
| HH0710 | 689614 | 690306 | 231  | + |             | Conserved hypothetical protein, similar to <i>H. pylori</i> HP1331, predicted membrane-associated                   |
| HH0711 | 690299 | 690637 | 113  | + |             | Conserved hypothetical protein, similar to <i>H. pylori</i> HP1330, predicted membrane-associated                   |
| HH0712 | 690674 | 691168 | 165  | - | <i>fldA</i> | Flavodoxin FldA                                                                                                     |
| HH0713 | 691323 | 692126 | 268  | - | <i>yaeC</i> | Conserved hypothetical protein, similar to <i>H. pylori</i> HP1564, predicted outer membrane protein                |
| HH0714 | 692180 | 693010 | 277  | - |             | Conserved hypothetical protein, similar to <i>H. pylori</i> putative outer membrane protein HP1564                  |
| HH0715 | 693037 | 693744 | 236  | - |             | Conserved hypothetical protein, similar to <i>H. pylori</i> HP1577, predicted ABC transporter permease component    |
| HH0716 | 693758 | 694810 | 351  | - | <i>abc</i>  | Conserved hypothetical protein, similar to <i>H. pylori</i> HP1576, predicted ABC transporter ATP binding component |
| HH0717 | 694906 | 695679 | 258  | - |             | Conserved hypothetical protein, similar to <i>H. pylori</i> HP1459, possible pseudouridine synthase                 |
| HH0718 | 695683 | 696813 | 377  | - |             | Conserved hypothetical protein, similar to <i>H. pylori</i> JHP0571, predicted secreted protein                     |
| HH0719 | 696883 | 698088 | 402  | - | <i>dapD</i> | 2,3,4,5-tetrahydropyridine-2-carboxylate N-succinyltransferase DapD                                                 |
| HH0720 | 698316 | 698786 | 157  | - |             | Conserved hypothetical protein, predicted secreted protein                                                          |
| HH0721 | 699209 | 701392 | 728  | + | <i>cfrA</i> | Conserved hypothetical protein, similar to <i>C. jejuni/coli</i> siderophore receptor protein CfrA                  |
| HH0722 | 701495 | 702931 | 479  | + | <i>fumC</i> | Fumarase                                                                                                            |
| HH0723 | 703014 | 704438 | 475  | + | <i>dcuB</i> | Anaerobic C4-dicarboxylate transporter DcuB                                                                         |
| HH0724 | 704468 | 704569 | 34   | + |             | Hypothetical protein, predicted membrane-associated                                                                 |
| HH0725 | 704613 | 706667 | 685  | + |             | Conserved hypothetical protein, similar to methyl-accepting chemotaxis protein, similar to <i>C. jejuni</i> CJ1506c |
| HH0726 | 706759 | 707682 | 308  | - | <i>accA</i> | Acetyl-CoA carboxylase, $\alpha$ subunit                                                                            |
| HH0727 | 707698 | 708930 | 411  | - | <i>fabF</i> | 3-oxoacyl-[acyl-carrier-protein] synthase II FabF                                                                   |
| HH0728 | 709009 | 709236 | 76   | - |             | Acyl carrier protein                                                                                                |
| HH0729 | 709267 | 709452 | 62   | + |             | Hypothetical protein                                                                                                |
| HH0730 | 709455 | 710132 | 226  | - |             | Hypothetical protein                                                                                                |
| HH0731 | 710148 | 710300 | 51   | - |             | Hypothetical protein                                                                                                |
| HH0732 | 710400 | 711140 | 247  | - | <i>fabG</i> | 3-oxoacyl-[acyl-carrier protein] reductase                                                                          |
| HH0733 | 711194 | 713506 | 771  | - |             | Conserved hypothetical protein, similar to <i>H. pylori</i> HP0597, predicted penicillin binding protein            |
| HH0734 | 713506 | 718950 | 1815 | - |             | Hypothetical protein, predicted membrane-associated                                                                 |
| HH0735 | 719037 | 719945 | 303  | - | <i>sfhB</i> | Conserved hypothetical protein, similar to <i>H. pylori</i> HP0347, predicted pseudouridylate synthase, SfhB-like   |
| HH0736 | 720688 | 722130 | 481  | - |             | Hypothetical protein, predicted membrane-associated                                                                 |
| HH0737 | 722273 | 722389 | 39   | + |             | Hypothetical protein                                                                                                |
| HH0738 | 722420 | 723244 | 275  | + |             | Amino-acid ABC transporter periplasmic solute-binding protein                                                       |
| HH0739 | 723288 | 723782 | 165  | - | <i>msrA</i> | Peptide methionine sulfoxide reductase MrsA                                                                         |

|        |        |        |     |   |             |                                                                                                                      |
|--------|--------|--------|-----|---|-------------|----------------------------------------------------------------------------------------------------------------------|
| HH0740 | 723867 | 725234 | 456 | + | <i>selA</i> | L-seryl-tRNA selenium transferase                                                                                    |
| HH0741 | 725248 | 727143 | 632 | + | <i>selB</i> | Selenocysteine-specific elongation factor SelB                                                                       |
| HH0742 | 727163 | 728263 | 367 | + |             | Hypothetical protein                                                                                                 |
| HH0743 | 728277 | 729512 | 412 | + | <i>moeA</i> | Molybdopterin biosynthesis enzyme                                                                                    |
| HH0744 | 729543 | 729956 | 138 | + |             | Conserved hypothetical protein, similar to <i>H. pylori</i> HP0031                                                   |
| HH0745 | 729969 | 731621 | 551 | + |             | Hypothetical protein, predicted secreted protein                                                                     |
| HH0746 | 731701 | 732138 | 146 | + |             | Hypothetical protein, predicted secreted protein                                                                     |
| HH0747 | 732229 | 732339 | 37  | - |             | Hypothetical protein                                                                                                 |
| HH0748 | 732419 | 733102 | 228 | - |             | Hypothetical protein                                                                                                 |
| HH0749 | 733425 | 733610 | 62  | + |             | Hypothetical protein                                                                                                 |
| HH0750 | 733628 | 735877 | 750 | + |             | Hypothetical protein                                                                                                 |
| HH0751 | 735939 | 736067 | 43  | + |             | Hypothetical protein                                                                                                 |
| HH0752 | 736252 | 737121 | 290 | + |             | Conserved hypothetical protein, similar to <i>Campylobacter coli</i> , predicted phage transposition protein MuB     |
| HH0753 | 737135 | 737314 | 60  | + |             | Hypothetical protein                                                                                                 |
| HH0754 | 737308 | 737784 | 159 | + |             | Conserved hypothetical protein, similar to <i>Campylobacter coli</i> , predicted host-nuclease inhibitor protein Gam |
| HH0755 | 737818 | 738201 | 128 | + |             | Hypothetical protein                                                                                                 |
| HH0756 | 738204 | 738452 | 83  | + |             | Hypothetical protein                                                                                                 |
| HH0757 | 738627 | 738854 | 76  | + |             | Hypothetical protein                                                                                                 |
| HH0758 | 738850 | 739350 | 167 | + |             | Hypothetical protein                                                                                                 |
| HH0759 | 739469 | 740005 | 179 | - |             | Hypothetical protein                                                                                                 |
| HH0760 | 740019 | 741512 | 498 | - |             | Hypothetical protein                                                                                                 |
| HH0761 | 741730 | 742557 | 276 | - |             | Hypothetical protein                                                                                                 |
| HH0762 | 742721 | 743071 | 117 | + |             | Hypothetical protein, predicted secreted protein                                                                     |
| HH0763 | 743058 | 743264 | 69  | + |             | Hypothetical protein, predicted secreted protein                                                                     |
| HH0764 | 743264 | 743449 | 62  | + |             | Hypothetical protein, predicted membrane-associated                                                                  |
| HH0765 | 743449 | 743760 | 104 | + |             | Hypothetical protein, predicted membrane-associated                                                                  |
| HH0766 | 743760 | 743861 | 34  | + |             | Hypothetical protein, predicted secreted protein                                                                     |
| HH0767 | 743877 | 744440 | 188 | + |             | Hypothetical protein                                                                                                 |
| HH0768 | 744506 | 745075 | 190 | + |             | Hypothetical protein                                                                                                 |
| HH0769 | 745179 | 745481 | 101 | + |             | Hypothetical protein                                                                                                 |
| HH0770 | 745547 | 745735 | 63  | + |             | Hypothetical protein                                                                                                 |
| HH0771 | 745735 | 747399 | 555 | + |             | Hypothetical protein, predicted membrane-associated                                                                  |
| HH0772 | 747418 | 748287 | 290 | + |             | Hypothetical protein                                                                                                 |
| HH0773 | 748506 | 750068 | 521 | + |             | Conserved hypothetical protein, similar to <i>C. jejuni</i> CJ1135, predicted glycosyl transferase                   |
| HH0774 | 750115 | 751998 | 628 | - |             | Conserved hypothetical protein, similar to <i>H. pylori</i> JHP1312, predicted membrane-associated                   |
| HH0775 | 751998 | 752681 | 228 | - |             | Hypothetical protein, predicted membrane-associated                                                                  |
| HH0776 | 752681 | 753421 | 247 | - | <i>yhcG</i> | ABC transporter, ATP binding component                                                                               |
| HH0777 | 753516 | 753725 | 70  | - | <i>rpsU</i> | Ribosomal protein S21                                                                                                |
| HH0778 | 753965 | 755176 | 404 | - | <i>ftsZ</i> | Cell division protein FtsZ                                                                                           |
| HH0779 | 755192 | 756559 | 456 | - | <i>ftsA</i> | Cell division protein FtsA                                                                                           |
| HH0780 | 756570 | 758066 | 499 | - |             | Conserved hypothetical protein, similar to <i>H. pylori</i> JHP0911, predicted secreted protein                      |
| HH0781 | 758096 | 758221 | 42  | - |             | Hypothetical protein, predicted membrane-associated                                                                  |
| HH0782 | 758297 | 759436 | 380 | - | <i>ftsW</i> | Bacterial cell division membrane protein FtsW/MrdB/SpoVE                                                             |
| HH0783 | 759497 | 760549 | 351 | + |             | Ribosomal pseudouridine synthase                                                                                     |

|        |        |        |        |   |               |                                                                                                                                    |
|--------|--------|--------|--------|---|---------------|------------------------------------------------------------------------------------------------------------------------------------|
| HH0784 | 760482 | 761744 | 41.019 | + |               | Conserved hypothetical protein, similar to <i>H. pylori</i> JHP0683, predicted secreted protein                                    |
| HH0785 | 761747 | 762934 | 396    | + |               | Conserved hypothetical protein, similar to <i>C. jejuni</i> CJ1278c                                                                |
| HH0786 | 762941 | 763606 | 222    | + | <i>ftsE</i>   | ABC transporter, ATP-binding component, possibly involved in cell division                                                         |
| HH0787 | 763596 | 764402 | 41.948 | + | <i>ftsX</i>   | Cell division protein FtsX                                                                                                         |
| HH0788 | 764353 | 765621 | 423    | + |               | Conserved hypothetical protein, similar to <i>H. pylori</i> HP0750                                                                 |
| HH0789 | 765679 | 766068 | 130    | + | <i>flaG</i>   | Conserved hypothetical protein, similar to FlaG protein involved in polar flagella biogenesis, similar to <i>H. pylori</i> HP0751  |
| HH0790 | 766121 | 768166 | 682    | + | <i>fliD</i>   | Flagellar filament capping protein FliD                                                                                            |
| HH0791 | 768180 | 768560 | 127    | + | <i>fliS</i>   | Flagellin FlaA and FlaB chaperone protein FliS                                                                                     |
| HH0792 | 768547 | 768777 | 77     | + |               | Conserved hypothetical protein, similar to <i>H. pylori</i> HP0754                                                                 |
| HH0793 | 768908 | 769192 | 95     | + |               | Histone-like DNA-binding protein HU (HupB), similar to <i>C. jejuni</i> CJ0913c                                                    |
| HH0794 | 769224 | 770156 | 311    | - | <i>gpsA</i>   | Glycerol 3-phosphate dehydrogenase                                                                                                 |
| HH0795 | 770203 | 770880 | 226    | - |               | Hypothetical protein, predicted secreted protein                                                                                   |
| HH0796 | 771081 | 772502 | 474    | + | <i>gatB</i>   | Glu-tRNA <sup>Gln</sup> amidotransferase, subunit B                                                                                |
| HH0797 | 772873 | 775929 | 1019   | + |               | Conserved hypothetical protein, possible SNF2 family helicase                                                                      |
| HH0798 | 775929 | 779096 | 1056   | + |               | Conserved hypothetical protein, similar to <i>H. pylori</i> JHP1409, predicted type II DNA modification enzyme (methyltransferase) |
| HH0799 | 779190 | 780506 | 439    | + |               | Hypothetical protein                                                                                                               |
| HH0800 | 780641 | 781687 | 349    | + |               | Conserved hypothetical protein, similar to <i>H. pylori</i> JHP0346                                                                |
| HH0801 | 782105 | 782245 | 47     | + |               | Hypothetical protein                                                                                                               |
| HH0802 | 782301 | 782447 | 49     | + |               | Conserved hypothetical protein                                                                                                     |
| HH0803 | 782538 | 782630 | 31     | - |               | Hypothetical protein                                                                                                               |
| HH0804 | 782667 | 783227 | 187    | - |               | Hypothetical protein, predicted secreted protein                                                                                   |
| HH0805 | 783235 | 784812 | 526    | - |               | Conserved hypothetical protein, similar to <i>C. jejuni</i> CJ0256, predicted membrane-associated                                  |
| HH0806 | 784817 | 786052 | 412    | - | <i>proA</i>   | $\gamma$ -glutamyl phosphate reductase                                                                                             |
| HH0807 | 786055 | 787116 | 354    | - | <i>gcpE</i>   | GcpE protein homolog                                                                                                               |
| HH0808 | 787130 | 787552 | 141    | + | <i>hypA</i>   | Hydrogenase expression/formation protein HypA                                                                                      |
| HH0809 | 787568 | 788020 | 151    | + |               | Hypothetical protein                                                                                                               |
| HH0810 | 788039 | 789202 | 388    | + | <i>lpxB</i>   | Lipid A disaccharide synthetase                                                                                                    |
| HH0811 | 789458 | 790852 | 465    | + |               | Conserved hypothetical protein, similar to <i>H. pylori</i> HP0497, putative sodium-dependent transporter                          |
| HH0812 | 790964 | 791629 | 222    | - |               | Conserved hypothetical protein, similar to <i>H. pylori</i> Hop-family proteins                                                    |
| HH0813 | 792001 | 792906 | 302    | - |               | Hypothetical protein                                                                                                               |
| HH0814 | 792921 | 793781 | 287    | - |               | Hypothetical protein                                                                                                               |
| HH0815 | 793721 | 794452 | 244    | - |               | Hypothetical protein, predicted membrane-associated                                                                                |
| HH0816 | 794556 | 795320 | 255    | - |               | Conserved hypothetical protein, similar to <i>H. pylori</i> JHP1437, predicted secreted protein                                    |
| HH0817 | 795324 | 796307 | 328    | - |               | Conserved hypothetical protein, similar to <i>H. pylori</i> HP0727, predicted transcriptional regulator                            |
| HH0818 | 796311 | 797543 | 411    | - | <i>nspC</i>   | Carboxynorspermidine decarboxylase NspC                                                                                            |
| HH0819 | 797533 | 798495 | 321    | - |               | Chemotaxis signal transduction protein CheV, similar to <i>H. pylori</i> HP0019 (CheV1)                                            |
| HH0820 | 798556 | 799275 | 240    | - | <i>pssA</i>   | Phosphatidylserine synthase PssA                                                                                                   |
| HH0821 | 799268 | 799897 | 210    | - |               | Conserved hypothetical protein, similar to <i>H. pylori</i> JHP0354, predicted membrane-associated                                 |
| HH0822 | 799910 | 801742 | 611    | - | <i>ftsH_2</i> | Membrane bound zinc metallopeptidase, cell division protein FtsH                                                                   |
| HH0823 | 801742 | 801858 | 39     | - |               | Hypothetical protein                                                                                                               |
| HH0824 | 801834 | 802784 | 317    | - | <i>prmA</i>   | Ribosomal protein L11 methyltransferase                                                                                            |
| HH0825 | 802809 | 803183 | 125    | - | <i>cheY</i>   | Chemotaxis regulatory protein CheY                                                                                                 |
| HH0826 | 803274 | 804002 | 243    | - | <i>hisA</i>   | Phosphoribosylformimino-5-aminoimidazole carboxamide ribonucleotide (ProFAR) isomerase                                             |

|        |        |        |     |   |             |                                                                                                                         |
|--------|--------|--------|-----|---|-------------|-------------------------------------------------------------------------------------------------------------------------|
| HH0827 | 804008 | 804859 | 284 | - |             | Hypothetical protein, predicted membrane-associated                                                                     |
| HH0828 | 804878 | 806041 | 388 | - | <i>amiA</i> | N-acetylmuramoyl-L-alanine amidase                                                                                      |
| HH0829 | 806053 | 807135 | 361 | - |             | Conserved hypothetical protein, similar to <i>H. pylori</i> HP0773                                                      |
| HH0830 | 807149 | 808348 | 400 | - | <i>tyrS</i> | Tyrosyl-tRNA synthetase                                                                                                 |
| HH0831 | 808364 | 810511 | 716 | - | <i>spoT</i> | Conserved hypothetical protein, similar to guanosine-3',5'-bis(diphosphate) 3'-pyrophosphohydrolase                     |
| HH0832 | 810524 | 810745 | 74  | - | <i>rpoZ</i> | Conserved hypothetical protein, similar to <i>H. pylori</i> HP0776, possibly DNA-directed RNA polymerase, omega subunit |
| HH0833 | 810826 | 811533 | 236 | - | <i>pyrH</i> | Uridylate kinase                                                                                                        |
| HH0834 | 811676 | 812179 | 168 | - |             | Hypothetical protein, predicted secreted protein                                                                        |
| HH0835 | 812265 | 812651 | 129 | - |             | Hypothetical protein, predicted secreted protein                                                                        |
| HH0836 | 812683 | 814107 | 475 | - |             | Conserved hypothetical protein, similar to <i>C. jejuni</i> CJ1249                                                      |
| HH0837 | 814153 | 814902 | 250 | - |             | Conserved hypothetical protein, similar to <i>H. pylori</i> HP1504                                                      |
| HH0838 | 814893 | 815936 | 348 | - | <i>ribD</i> | Riboflavin biosynthesis protein RibD                                                                                    |
| HH0839 | 815923 | 816393 | 157 | - |             | Conserved hypothetical protein, similar to <i>H. pylori</i> JHP0379                                                     |
| HH0840 | 816407 | 816754 | 116 | - | <i>rbfA</i> | Ribosome-binding factor A                                                                                               |
| HH0841 | 816747 | 817889 | 381 | - | <i>tgt</i>  | Queuine tRNA-ribosyltransferase                                                                                         |
| HH0842 | 817906 | 818757 | 284 | - | <i>proC</i> | Pyrroline-5-carboxylate reductase                                                                                       |
| HH0843 | 818760 | 819263 | 168 | - |             | Conserved hypothetical protein, similar to <i>H. pylori</i> HP1377                                                      |
| HH0844 | 819333 | 819971 | 213 | + | <i>comL</i> | Conserved hypothetical protein, similar to <i>H. pylori</i> HP1378, predicted ComL-like lipoprotein                     |
| HH0845 | 819983 | 822388 | 802 | + | <i>lon</i>  | ATP-dependent protease LA                                                                                               |
| HH0846 | 822438 | 823631 | 398 | - |             | Hypothetical protein                                                                                                    |
| HH0847 | 823782 | 825152 | 457 | - |             | Hypothetical protein                                                                                                    |
| HH0848 | 825289 | 825402 | 38  | - |             | Hypothetical protein, predicted secreted protein                                                                        |
| HH0849 | 825490 | 826389 | 300 | + | <i>cysK</i> | Cysteine synthase                                                                                                       |
| HH0850 | 826493 | 828208 | 572 | - |             | Dihydroxy-acid dehydratase                                                                                              |
| HH0851 | 828292 | 829194 | 301 | - | <i>metF</i> | Conserved hypothetical protein, possible 5,10-methylenetetrahydrofolate reductase                                       |
| HH0852 | 829233 | 831506 | 758 | - | <i>metE</i> | 5-methyltetrahydropteroyltriglutamate-homocysteine methyltransferase                                                    |
| HH0853 | 831727 | 832581 | 285 | - | <i>pldA</i> | Phospholipase A                                                                                                         |
| HH0854 | 832635 | 834485 | 60  | + | <i>glmS</i> | Glucosamine-fructose-6-phosphate aminotransferase                                                                       |
| HH0855 | 834478 | 834894 | 139 | - |             | Hypothetical protein, predicted membrane-associated                                                                     |
| HH0856 | 834937 | 835836 | 300 | - |             | Membrane protease subunits, similar to phage lambda cII repressor protease                                              |
| HH0857 | 836061 | 837419 | 453 | + |             | Hypothetical protein                                                                                                    |
| HH0858 | 837433 | 837558 | 42  | + |             | Hypothetical protein                                                                                                    |
| HH0859 | 837576 | 840251 | 892 | - | <i>alaS</i> | Alanyl-tRNA synthetase                                                                                                  |
| HH0860 | 840306 | 840731 | 142 | - |             | Conserved hypothetical protein, similar to <i>H. pylori</i> HP1580, predicted membrane-associated                       |
| HH0861 | 840971 | 841894 | 308 | - | <i>pdxA</i> | Pyridoxal phosphate biosynthetic protein A                                                                              |
| HH0862 | 841885 | 842685 | 267 | - | <i>pdxJ</i> | Pyridoxal phosphate biosynthetic protein J                                                                              |
| HH0863 | 842699 | 843178 | 160 | - | <i>ilvH</i> | Acetolactate synthase, small subunit                                                                                    |
| HH0864 | 843183 | 844892 | 570 | - | <i>ilvI</i> | Acetolactate synthase, large subunit                                                                                    |
| HH0865 | 845046 | 846212 | 389 | + |             | Conserved hypothetical protein, similar to <i>C. jejuni</i> predicted transport transmembrane protein CJ1040c           |
| HH0866 | 846277 | 846669 | 131 | + |             | Conserved hypothetical protein, similar to <i>C. jejuni</i> CJ202c, predicted secreted protein                          |
| HH0867 | 846644 | 846811 | 56  | + |             | Hypothetical protein, predicted membrane-associated                                                                     |
| HH0868 | 846898 | 847101 | 68  | + |             | Conserved hypothetical protein, similar to <i>C. jejuni</i> putative integral membrane protein CJ0201c                  |
| HH0869 | 847277 | 848674 | 466 | - | <i>glcD</i> | Glycolate oxidase, subunit D                                                                                            |
| HH0870 | 848680 | 849423 | 248 | - |             | Conserved hypothetical protein, similar to <i>C. jejuni</i> CJ1214c, predicted secreted protein                         |

|        |        |        |     |   |               |                                                                                                                          |
|--------|--------|--------|-----|---|---------------|--------------------------------------------------------------------------------------------------------------------------|
| HH0871 | 849437 | 850096 | 220 | - |               | Conserved hypothetical protein, similar to <i>H. pylori</i> HP0507                                                       |
| HH0872 | 850089 | 851285 | 399 | - |               | Conserved hypothetical protein, similar to <i>H. pylori</i> HP0506, predicted secreted protein                           |
| HH0873 | 851450 | 851635 | 62  | + |               | Hypothetical protein, predicted membrane-associated                                                                      |
| HH0874 | 851729 | 851938 | 70  | + | <i>flgM</i>   | Flagellar anti FliA ( $\sigma$ 28) factor FlgM                                                                           |
| HH0875 | 852006 | 852428 | 141 | + |               | Conserved hypothetical protein, similar to <i>H. pylori</i> JHP1048                                                      |
| HH0876 | 852440 | 854257 | 606 | + | <i>flgK</i>   | Flagellar hook-associated protein FlgK                                                                                   |
| HH0877 | 854244 | 854969 | 242 | + |               | Conserved hypothetical protein, similar to <i>H. pylori</i> HP0174, predicted membrane-associated                        |
| HH0878 | 855057 | 855431 | 125 | - |               | Hypothetical protein                                                                                                     |
| HH0879 | 855415 | 857100 | 562 | - | <i>ftsH_1</i> | ATP-dependent zinc metalloproteinase, cell division protein FtsH                                                         |
| HH0880 | 857090 | 858358 | 423 | - |               | Conserved hypothetical protein, similar to <i>H. pylori</i> HP0285                                                       |
| HH0881 | 858373 | 859992 | 540 | - |               | Conserved hypothetical protein, similar to <i>H. pylori</i> HP0284, predicted membrane-associated                        |
| HH0882 | 859992 | 861050 | 353 | - | <i>aroB</i>   | 3-dehydroquinate synthase                                                                                                |
| HH0883 | 861062 | 862492 | 477 | - |               | Conserved hypothetical protein, similar to <i>H. pylori</i> HP0282                                                       |
| HH0884 | 862560 | 863240 | 227 | - |               | Conserved hypothetical protein, similar to <i>H. pylori</i> HP0778                                                       |
| HH0885 | 863252 | 863506 | 85  | - |               | Conserved hypothetical protein, similar to <i>H. pylori</i> HP0495                                                       |
| HH0886 | 863513 | 863926 | 138 | - |               | Conserved hypothetical protein, similar to <i>H. pylori</i> HP0496                                                       |
| HH0887 | 864254 | 865504 | 417 | + |               | Conserved hypothetical protein, similar to <i>H. pylori</i> sodium- and chloride-dependent transporter                   |
| HH0888 | 865515 | 866648 | 378 | - | <i>carA</i>   | Carbamoylphosphate synthase small subunit                                                                                |
| HH0889 | 866648 | 867196 | 183 | - |               | Conserved hypothetical protein, similar to <i>H. pylori</i> JHP1157                                                      |
| HH0890 | 867269 | 869275 | 669 | - | <i>pbpA</i>   | Penicillin-binding protein                                                                                               |
| HH0891 | 869286 | 870689 | 468 | - |               | Conserved hypothetical protein, similar to <i>H. pylori</i> JHP0546, predicted methyl-accepting chemotaxis protein (MCP) |
| HH0892 | 870764 | 870859 | 32  | - |               | Hypothetical protein                                                                                                     |
| HH0893 | 870931 | 871389 | 153 | + | <i>fur</i>    | Ferric uptake regulation protein                                                                                         |
| HH0894 | 871573 | 872250 | 226 | - |               | Hypothetical protein                                                                                                     |
| HH0895 | 872256 | 873557 | 434 | - |               | Conserved hypothetical protein, similar to <i>H. pylori</i> conserved hypothetical integral membrane protein             |
| HH0896 | 873570 | 874793 | 408 | - | <i>cysK</i>   | Threonine dehydratase                                                                                                    |
| HH0897 | 874796 | 875782 | 329 | - |               | Conserved hypothetical protein, similar to <i>H. pylori</i> HP1234, predicted membrane-associated                        |
| HH0898 | 875782 | 875874 | 31  | - |               | Hypothetical protein                                                                                                     |
| HH0899 | 875956 | 876687 | 244 | + | <i>flgH</i>   | Flagellar basal body L-ring protein FlgH                                                                                 |
| HH0900 | 876702 | 877406 | 235 | + | <i>neuA</i>   | Acylneuraminate cytidyltransferase                                                                                       |
| HH0901 | 877415 | 877660 | 82  | - |               | Conserved hypothetical protein, similar to <i>C. jejuni</i> CJ0761                                                       |
| HH0902 | 877651 | 877845 | 65  | - |               | Hypothetical protein                                                                                                     |
| HH0903 | 877866 | 879089 | 408 | - |               | Hypothetical protein, predicted secreted protein                                                                         |
| HH0904 | 879112 | 879285 | 58  | - |               | Hypothetical protein                                                                                                     |
| HH0905 | 879336 | 879662 | 109 | - |               | Hypothetical protein                                                                                                     |
| HH0906 | 879791 | 880045 | 85  | + |               | Hypothetical protein                                                                                                     |
| HH0907 | 880147 | 881691 | 515 | + |               | Conserved hypothetical protein, putative flagellar modification protein                                                  |
| HH0908 | 881691 | 882737 | 349 | + |               | Sialic acid synthase                                                                                                     |
| HH0909 | 882806 | 883918 | 371 | + |               | Conserved hypothetical protein, possible aminotransferase                                                                |
| HH0910 | 883938 | 884843 | 302 | + | <i>miaA</i>   | TRNA delta(2)-isopentenylpyrophosphate transferase                                                                       |
| HH0911 | 884850 | 885248 | 133 | - |               | Hypothetical protein                                                                                                     |
| HH0912 | 885262 | 885951 | 230 | - |               | Conserved hypothetical protein, similar to <i>H. pylori</i> HP0920, predicted membrane-associated                        |
| HH0913 | 886072 | 887445 | 458 | - |               | Conserved hypothetical protein, possible ferredoxin-like protein, predicted membrane-associated                          |
| HH0914 | 887587 | 889194 | 536 | + |               | ABC transport system, ATP-binding protein                                                                                |

|        |        |        |     |   |             |                                                                                                                    |
|--------|--------|--------|-----|---|-------------|--------------------------------------------------------------------------------------------------------------------|
| HH0915 | 889352 | 889552 | 67  | - |             | Hypothetical protein                                                                                               |
| HH0916 | 889542 | 889829 | 96  | - |             | Hypothetical protein, predicted secreted protein                                                                   |
| HH0917 | 889913 | 890683 | 257 | - |             | Hypothetical protein                                                                                               |
| HH0918 | 890890 | 891297 | 136 | + |             | Hypothetical protein                                                                                               |
| HH0919 | 891881 | 892390 | 170 | - |             | Conserved hypothetical protein, similar to <i>H. pylori</i> HP0952, CinA/YgaD-like                                 |
| HH0920 | 892487 | 893563 | 359 | + |             | Conserved hypothetical protein, similar to <i>C. jejuni</i> CJ0604                                                 |
| HH0921 | 893662 | 894402 | 247 | + |             | Carbonic anhydrase                                                                                                 |
| HH0922 | 894455 | 894781 | 109 | + |             | Hypothetical protein                                                                                               |
| HH0923 | 894824 | 895495 | 224 | + |             | Conserved hypothetical protein, similar to <i>H. pylori</i> HP1509, predicted membrane-associated                  |
| HH0924 | 895498 | 895830 | 111 | + |             | Conserved hypothetical protein, similar to <i>H. pylori</i> JHP1403, predicted dihydroneopterin aldolase           |
| HH0925 | 895841 | 896812 | 324 | - |             | Hypothetical protein                                                                                               |
| HH0926 | 896891 | 898282 | 464 | - | <i>gltX</i> | Glutamyl-tRNA synthetases                                                                                          |
| HH0927 | 898426 | 899475 | 350 | + | <i>murG</i> | UDP-N-acetylglucosamine-N-acetylmuramyl-(pentapeptide) pyrophosphoryl-undecaprenol N-acetylglucosamine transferase |
| HH0928 | 899641 | 900396 | 252 | + | <i>lexA</i> | Exodeoxyribonuclease LexA                                                                                          |
| HH0929 | 900423 | 901049 | 209 | + |             | Conserved hypothetical protein, possible uracil-DNA glycosylase                                                    |
| HH0930 | 902671 | 903972 | 434 | + |             | Conserved hypothetical protein, similar to <i>H. pylori</i> HP0275, predicted secreted protein                     |
| HH0931 | 903975 | 906002 | 676 | - | <i>rep</i>  | ATP-dependent DNA helicase                                                                                         |
| HH0932 | 906016 | 906432 | 139 | - |             | Conserved hypothetical protein, similar to <i>H. pylori</i> HP1154                                                 |
| HH0933 | 906508 | 909204 | 899 | + | <i>valS</i> | Valyl-tRNA synthetase                                                                                              |
| HH0934 | 909813 | 910946 | 378 | + |             | Conserved hypothetical protein, similar to <i>C. jejuni</i> CJ0760                                                 |
| HH0935 | 910961 | 911314 | 118 | - | <i>rplS</i> | Ribosomal protein L19                                                                                              |
| HH0936 | 911314 | 912036 | 241 | - | <i>trmD</i> | TRNA-(guanine-N1)-methyltransferase                                                                                |
| HH0937 | 912036 | 912494 | 153 | - |             | Conserved hypothetical protein                                                                                     |
| HH0938 | 912584 | 912820 | 79  | - |             | Conserved hypothetical protein, similar to <i>C. jejuni</i> CJ0711                                                 |
| HH0939 | 912839 | 913069 | 77  | - | <i>rpsP</i> | Ribosomal protein S16                                                                                              |
| HH0940 | 913147 | 914487 | 447 | - | <i>ffh</i>  | Signal recognition particle protein                                                                                |
| HH0941 | 914523 | 914630 | 36  | + |             | Hypothetical protein, predicted membrane-associated                                                                |
| HH0942 | 914630 | 915037 | 136 | + |             | Transcriptional regulator, FurR family                                                                             |
| HH0943 | 915048 | 917090 | 681 | - |             | Conserved hypothetical protein, similar to <i>H. pylori</i> JHP0417                                                |
| HH0944 | 917099 | 918154 | 352 | - |             | Conserved hypothetical protein, possible peptidase                                                                 |
| HH0945 | 918158 | 918631 | 158 | - |             | 3-dehydroquinate dehydratase II                                                                                    |
| HH0946 | 918754 | 920421 | 556 | - |             | Hypothetical protein                                                                                               |
| HH0947 | 920430 | 921578 | 383 | - |             | Conserved hypothetical protein, similar to <i>H. pylori</i> JHP0703, predicted membrane-associated                 |
| HH0948 | 921640 | 921912 | 91  | - |             | Conserved hypothetical protein, similar to <i>H. pylori</i> HP0764                                                 |
| HH0949 | 922013 | 922255 | 81  | + |             | Hypothetical protein                                                                                               |
| HH0950 | 922408 | 924891 | 828 | - | <i>bisC</i> | Biotin sulfoxide reductase BisC                                                                                    |
| HH0951 | 924894 | 925484 | 197 | - |             | Conserved hypothetical protein, similar to <i>C. jejuni</i> CJ0265c, predicted cytochrome c-type protein           |
| HH0952 | 925595 | 926404 | 270 | - |             | Conserved hypothetical protein, similar to <i>H. pylori</i> HP0257, predicted secreted protein                     |
| HH0953 | 926404 | 926829 | 142 | - |             | Conserved hypothetical protein, similar to <i>Caulobacter crescentus</i> FliJ, similar to <i>H. pylori</i> HP0256  |
| HH0954 | 926839 | 928083 | 415 | - | <i>purA</i> | Adenylosuccinate synthetase PurA                                                                                   |
| HH0955 | 928116 | 928955 | 280 | - |             | Hypothetical protein                                                                                               |
| HH0956 | 929079 | 930113 | 345 | + | <i>trmU</i> | TRNA (5-methylaminomethyl-2-thiouridylate)-methyltransferase, putative                                             |
| HH0957 | 930235 | 930621 | 129 | + |             | Conserved hypothetical protein, similar to <i>H. pylori</i> replication protein A                                  |

|        |        |        |     |   |               |                                                                                                                               |
|--------|--------|--------|-----|---|---------------|-------------------------------------------------------------------------------------------------------------------------------|
| HH0958 | 930636 | 930779 | 48  | - |               | Hypothetical protein                                                                                                          |
| HH0959 | 930886 | 931281 | 132 | + |               | Hypothetical protein                                                                                                          |
| HH0960 | 931337 | 931990 | 218 | + |               | Hypothetical protein, predicted membrane-associated                                                                           |
| HH0961 | 932075 | 932239 | 55  | + |               | Hypothetical protein, predicted secreted protein                                                                              |
| HH0962 | 933064 | 933525 | 154 | - |               | Hypothetical protein, predicted membrane-associated                                                                           |
| HH0963 | 933512 | 933943 | 144 | - |               | Conserved hypothetical protein, similar to <i>C. jejuni</i> putative integral membrane protein, predicted membrane-associated |
| HH0964 | 933949 | 935253 | 435 | - | <i>hemL</i>   | Glutamate-1-semialdehyde 2,1-aminomutase                                                                                      |
| HH0965 | 935277 | 935366 | 30  | + |               | Hypothetical protein, predicted secreted protein                                                                              |
| HH0966 | 935462 | 936019 | 186 | + |               | Conserved hypothetical protein, similar to <i>C. jejuni</i> putative periplasmic protein                                      |
| HH0967 | 936181 | 937899 | 573 | + |               | Hypothetical protein                                                                                                          |
| HH0968 | 938008 | 938538 | 177 | - |               | Conserved hypothetical protein                                                                                                |
| HH0969 | 938727 | 939923 | 399 | + | <i>argD</i>   | Acetylornithine aminotransferase                                                                                              |
| HH0970 | 939907 | 941001 | 365 | + |               | Conserved hypothetical protein, similar to <i>H. pylori</i> HP0812                                                            |
| HH0971 | 941085 | 943073 | 663 | + |               | Conserved hypothetical protein, similar to <i>C. jejuni</i> putative methyl-accepting chemotaxis signal transduction protein  |
| HH0972 | 943107 | 944147 | 347 | - |               | Hypothetical protein                                                                                                          |
| HH0973 | 944232 | 945089 | 286 | - |               | Conserved hypothetical protein, similar to <i>C. jejuni</i> CJ20248                                                           |
| HH0974 | 945233 | 946540 | 436 | - |               | Conserved hypothetical protein, similar to <i>H. pylori</i> JHP0611, predicted glycerol-3-phosphate dehydrogenase GlpC        |
| HH0975 | 946553 | 947938 | 462 | - | <i>hemN_1</i> | Oxygen-independent coproporphyrinogen III oxidase                                                                             |
| HH0976 | 947956 | 948384 | 143 | - |               | Conserved hypothetical protein, similar to <i>H. pylori</i> HP0664                                                            |
| HH0977 | 948391 | 949377 | 329 | - | <i>argF</i>   | Ornithine carbamoyltransferase                                                                                                |
| HH0978 | 949456 | 950025 | 190 | - |               | Conserved hypothetical protein, similar to <i>H. pylori</i> HP0838, predicted secreted protein                                |
| HH0979 | 950052 | 950747 | 232 | - |               | Conserved hypothetical protein, similar to <i>C. jejuni</i> putative lipoprotein                                              |
| HH0980 | 951095 | 951847 | 251 | - |               | Conserved hypothetical protein, predicted glycosyl transferase                                                                |
| HH0981 | 951840 | 952838 | 333 | - |               | Conserved hypothetical protein, glucosyl transferase                                                                          |
| HH0982 | 958826 | 959767 | 314 | - |               | Lauroyl/myristoyl acyltransferase involved in lipid A biosynthesis                                                            |
| HH0983 | 959770 | 960861 | 364 | - |               | Lipopolysaccharide heptosyltransferase                                                                                        |
| HH0984 | 960888 | 962357 | 490 | - | <i>ppx</i>    | Exopolyphosphatase                                                                                                            |
| HH0985 | 962360 | 962608 | 83  | - | <i>fdxB</i>   | Ferredoxin                                                                                                                    |
| HH0986 | 962683 | 963330 | 216 | - |               | Hypothetical protein                                                                                                          |
| HH0987 | 963351 | 963455 | 35  | - |               | Hypothetical protein, predicted membrane-associated                                                                           |
| HH0988 | 963968 | 964069 | 34  | - |               | Conserved hypothetical protein, similar to <i>C. jejuni</i> putative periplasmic protein                                      |
| HH0989 | 964113 | 965048 | 312 | + |               | Conserved hypothetical protein, similar to <i>C. jejuni</i> CJ504c                                                            |
| HH0990 | 965011 | 966270 | 420 | - |               | Conserved hypothetical protein, similar to <i>H. pylori</i> JHP0602, predicted protease                                       |
| HH0991 | 966324 | 967421 | 366 | - |               | Conserved hypothetical protein, similar to <i>H. pylori</i> JHP0601                                                           |
| HH0992 | 967448 | 969682 | 745 | - |               | Conserved hypothetical outer membrane protein                                                                                 |
| HH0993 | 969754 | 970599 | 282 | - | <i>tyrA</i>   | Prephenate dehydrogenase                                                                                                      |
| HH0994 | 970630 | 971337 | 236 | - |               | Conserved hypothetical protein, similar to <i>H. pylori</i> HP0374                                                            |
| HH0995 | 971341 | 971766 | 142 | - |               | Conserved hypothetical protein, similar to <i>H. pylori</i> HP0375, predicted membrane-associated                             |
| HH0996 | 971883 | 972815 | 311 | + | <i>hemH</i>   | Ferrochelatase                                                                                                                |
| HH0997 | 972844 | 973461 | 206 | + |               | Conserved hypothetical protein, similar to <i>H. pylori</i> HP0377, predicted membrane-associated                             |
| HH0998 | 973476 | 976283 | 936 | + |               | Cytochrome c biogenesis protein, putative                                                                                     |
| HH0999 | 976341 | 978383 | 681 | + |               | Hypothetical protein, predicted secreted protein                                                                              |
| HH1000 | 978927 | 979496 | 190 | - |               | Conserved hypothetical protein, similar to <i>H. pylori</i> HP1162, predicted membrane-associated                             |

|        |         |         |     |   |               |                                                                                                                         |
|--------|---------|---------|-----|---|---------------|-------------------------------------------------------------------------------------------------------------------------|
| HH1001 | 979532  | 980221  | 230 | - | <i>ybbA</i>   | ABC transporter, ATP-binding component                                                                                  |
| HH1002 | 980385  | 980915  | 177 | + |               | Conserved hypothetical protein, similar to <i>H. pylori</i> secreted protein                                            |
| HH1003 | 980435  | 980923  | 163 | - |               | Conserved hypothetical protein, similar to <i>H. pylori</i> JHP1206, predicted secreted protein                         |
| HH1004 | 981083  | 981193  | 37  | - |               | Hypothetical protein                                                                                                    |
| HH1005 | 981363  | 982226  | 288 | - |               | Conserved hypothetical protein, similar to two-component response regulator proteins                                    |
| HH1006 | 982468  | 983694  | 409 | - |               | Ubiquinol cytochrome c oxidoreductase, cytochrome b subunit                                                             |
| HH1007 | 983707  | 984213  | 169 | - |               | Ubiquinol cytochrome C oxidoreductase, 2Fe-2S subunit                                                                   |
| HH1008 | 984364  | 985185  | 274 | + | <i>nadE</i>   | NH(3)-dependent NAD(+) synthetase NadE                                                                                  |
| HH1009 | 985198  | 986097  | 300 | + | <i>lpxK</i>   | Lipid A biosynthesis protein LpxK, tetraacyldisaccharide-1-P 4'-kinase                                                  |
| HH1010 | 986130  | 986585  | 152 | + | <i>bcp</i>    | Bacterioferritin comigratory protein Bcp                                                                                |
| HH1011 | 986626  | 989271  | 882 | - | <i>infB</i>   | Translation initiation factor 2 (GTPase)                                                                                |
| HH1012 | 989262  | 989510  | 83  | - |               | Conserved hypothetical protein, similar to <i>H. pylori</i> HP1049                                                      |
| HH1013 | 989533  | 990429  | 299 | - | <i>thrB</i>   | Homoserine kinase                                                                                                       |
| HH1014 | 990549  | 991031  | 161 | - |               | Conserved hypothetical protein, similar to <i>H. pylori</i> JHP0374                                                     |
| HH1015 | 991068  | 991964  | 299 | - | <i>lpxC</i>   | UDP-3-O-acyl-N-acetylglucosamine deacetylase                                                                            |
| HH1016 | 991964  | 992557  | 198 | - |               | Conserved hypothetical protein, possible bacterial septum site-determining protein MinC                                 |
| HH1017 | 992574  | 993956  | 461 | - |               | Conserved hypothetical protein, similar to <i>C. jejuni</i> CJ0131, predicted secreted protein                          |
| HH1018 | 994017  | 995141  | 375 | - | <i>flhB_1</i> | Flagellar basal body protein FlhB                                                                                       |
| HH1019 | 995148  | 995714  | 189 | - | <i>mobA</i>   | Molybdopterin-guanine dinucleotide biosynthesis protein                                                                 |
| HH1020 | 995808  | 996803  | 332 | + | <i>moaA</i>   | Molybdenum cofactor biosynthesis protein A                                                                              |
| HH1021 | 996902  | 997984  | 361 | + |               | Conserved hypothetical protein, similar to <i>C. jejuni</i> CJ1368                                                      |
| HH1022 | 998096  | 1000480 | 795 | + |               | Cation-transporting ATPase, P-type, CopA-like                                                                           |
| HH1023 | 1000593 | 1001705 | 371 | + |               | Conserved hypothetical protein, similar to <i>C. jejuni</i> CJ0069                                                      |
| HH1024 | 1001788 | 1001988 | 67  | - |               | Hypothetical protein                                                                                                    |
| HH1025 | 1002152 | 1004659 | 836 | + |               | Conserved hypothetical protein, similar to <i>E. coli</i> Z1202, predicted helicase                                     |
| HH1026 | 1004718 | 1005527 | 270 | - |               | Conserved hypothetical protein, similar to <i>Thermotoga maritima</i> oxidoreductase/aldo/keto reductase family protein |
| HH1027 | 1005984 | 1006649 | 222 | + |               | Conserved hypothetical protein, similar to <i>E. coli</i> YfcA, predicted membrane-associated                           |
| HH1028 | 1007202 | 1007375 | 58  | + |               | Hypothetical protein, predicted secreted protein                                                                        |
| HH1029 | 1007352 | 1009586 | 745 | - |               | Hypothetical protein                                                                                                    |
| HH1030 | 1009586 | 1011262 | 559 | - |               | Hypothetical protein, predicted secreted protein                                                                        |
| HH1031 | 1011453 | 1011923 | 157 | - |               | Conserved hypothetical protein, similar to <i>Y. pestis</i> putative exported protein YP02003                           |
| HH1032 | 1011901 | 1012296 | 132 | - |               | Hypothetical protein                                                                                                    |
| HH1033 | 1012406 | 1013440 | 345 | - |               | Conserved hypothetical protein, similar to <i>E. coli</i> Z0347, predicted secreted protein                             |
| HH1034 | 1013460 | 1014530 | 357 | - |               | Conserved hypothetical protein, predicted oxidoreductase                                                                |
| HH1035 | 1014704 | 1015279 | 192 | + |               | Hypothetical protein                                                                                                    |
| HH1036 | 1015368 | 1015829 | 154 | + |               | Hypothetical protein, predicted secreted protein                                                                        |
| HH1037 | 1015879 | 1016388 | 170 | + | <i>ogt</i>    | Methylated DNA-protein cysteine methyltransferase                                                                       |
| HH1038 | 1016511 | 1017743 | 411 | + |               | Type II R/M system, modification methylase                                                                              |
| HH1039 | 1017751 | 1019646 | 632 | + |               | Hypothetical protein                                                                                                    |
| HH1040 | 1019651 | 1021042 | 464 | + |               | Hypothetical protein                                                                                                    |
| HH1041 | 1021081 | 1021440 | 120 | + |               | Conserved hypothetical protein                                                                                          |
| HH1042 | 1021479 | 1022060 | 194 | - |               | Conserved hypothetical protein, predicted transcriptional regulator                                                     |
| HH1043 | 1022060 | 1022470 | 137 | - |               | Conserved hypothetical protein                                                                                          |
| HH1044 | 1022474 | 1023229 | 252 | - |               | Conserved hypothetical protein                                                                                          |



|        |         |         |     |   |               |                                                                                                                          |
|--------|---------|---------|-----|---|---------------|--------------------------------------------------------------------------------------------------------------------------|
| HH1045 | 1023447 | 1024709 | 421 | + |               | Hypothetical protein, predicted secreted protein                                                                         |
| HH1046 | 1024751 | 1025413 | 221 | + |               | Conserved hypothetical protein, predicted acetyltransferase                                                              |
| HH1047 | 1025545 | 1025676 | 44  | + |               | Hypothetical protein                                                                                                     |
| HH1048 | 1025766 | 1026626 | 287 | - | <i>rocF</i>   | Arginase                                                                                                                 |
| HH1049 | 1026748 | 1027857 | 370 | + |               | Hypothetical protein, predicted secreted protein                                                                         |
| HH1050 | 1027879 | 1028889 | 337 | - |               | Conserved hypothetical protein, similar to <i>H. pylori</i> ulcer associated adenine specific DNA methyltransferase IceA |
| HH1051 | 1028896 | 1029567 | 224 | - |               | Conserved hypothetical protein, similar to Neisseria lactamica type II restriction endonuclease                          |
| HH1052 | 1029637 | 1029756 | 40  | + |               | Hypothetical protein                                                                                                     |
| HH1053 | 1029759 | 1029863 | 35  | - |               | Hypothetical protein                                                                                                     |
| HH1054 | 1029866 | 1030381 | 172 | + |               | Conserved hypothetical protein, similar to Listeria monocytogenes LMO2438                                                |
| HH1055 | 1030384 | 1030503 | 40  | - |               | Hypothetical protein                                                                                                     |
| HH1056 | 1030511 | 1030915 | 135 | - |               | Conserved hypothetical protein, similar to <i>C. jejuni</i> CJ1556                                                       |
| HH1057 | 1031045 | 1031662 | 206 | + |               | Conserved hypothetical protein, similar to <i>C. jejuni</i> CJ1555c                                                      |
| HH1058 | 1031695 | 1031817 | 41  | + |               | Hypothetical protein, predicted membrane-associated                                                                      |
| HH1059 | 1031810 | 1032199 | 130 | + |               | Conserved hypothetical protein, predicted membrane-associated                                                            |
| HH1060 | 1032321 | 1032875 | 185 | + |               | Conserved hypothetical protein, similar to Listeria monocytogenes LMO2083                                                |
| HH1061 | 1032985 | 1034745 | 587 | + |               | Conserved hypothetical protein, similar to <i>H. pylori</i> JHP0572                                                      |
| HH1062 | 1034767 | 1035174 | 136 | + |               | Conserved hypothetical protein                                                                                           |
| HH1063 | 1035272 | 1036150 | 293 | + |               | Conserved hypothetical protein, similar to Bacillus subtilis aminoglycoside 6-adenyltransferase AAD(6)                   |
| HH1064 | 1036272 | 1037435 | 388 | + |               | Conserved hypothetical protein, predicted membrane-associated                                                            |
| HH1065 | 1037674 | 1038363 | 230 | + |               | Hypothetical protein, predicted membrane-associated                                                                      |
| HH1066 | 1038474 | 1039169 | 232 | - |               | Conserved hypothetical protein, similar to <i>H. pylori</i> JHP0907, predicted secreted protein                          |
| HH1067 | 1039241 | 1041349 | 703 | + | <i>glyS</i>   | Glycyl-tRNA synthetase, $\beta$ subunit                                                                                  |
| HH1068 | 1041349 | 1042467 | 373 | + |               | Conserved hypothetical protein, similar to <i>H. pylori</i> HP1486                                                       |
| HH1069 | 1042614 | 1042835 | 74  | + |               | Hypothetical protein                                                                                                     |
| HH1070 | 1042850 | 1043611 | 254 | - |               | Hypothetical protein, predicted membrane-associated                                                                      |
| HH1071 | 1043641 | 1044705 | 355 | - | <i>tfs</i>    | Translation elongation factor Ts                                                                                         |
| HH1072 | 1044710 | 1045501 | 264 | - | <i>rpsB</i>   | Ribosomal protein S2                                                                                                     |
| HH1073 | 1045584 | 1045676 | 31  | + |               | Hypothetical protein                                                                                                     |
| HH1074 | 1045707 | 1047014 | 436 | - | <i>rpoN</i>   | RNA polymerase $\sigma$ 54 factor                                                                                        |
| HH1075 | 1047014 | 1047733 | 240 | - | <i>yhbG</i>   | ABC-transporter ATP-binding protein                                                                                      |
| HH1076 | 1047733 | 1048164 | 144 | - |               | Conserved hypothetical protein, similar to <i>H. pylori</i> HP0716                                                       |
| HH1077 | 1048160 | 1049752 | 531 | - | <i>dnaX</i>   | DNA polymerase III $\gamma$ and tau subunits DnaX                                                                        |
| HH1078 | 1049733 | 1049840 | 36  | + |               | Hypothetical protein                                                                                                     |
| HH1079 | 1049901 | 1050530 | 210 | - |               | Conserved hypothetical protein, similar to <i>C. jejuni</i> CJ0593c, predicted membrane-associated                       |
| HH1080 | 1050591 | 1050704 | 38  | + |               | Hypothetical protein                                                                                                     |
| HH1081 | 1050682 | 1051467 | 262 | + | <i>flgG_2</i> | Flagellar distal rod protein FlgG, similar to HP1585 (FlgG2)                                                             |
| HH1082 | 1051486 | 1052742 | 419 | - |               | Conserved hypothetical protein, similar to <i>C. jejuni</i> CJ0609c                                                      |
| HH1083 | 1052736 | 1054055 | 440 | - |               | Conserved hypothetical protein, similar to <i>C. jejuni</i> putative periplasmic protein CJ0610c                         |
| HH1084 | 1054101 | 1055510 | 470 | - |               | Conserved hypothetical protein, predicted membrane-associated                                                            |
| HH1085 | 1055675 | 1056340 | 222 | - |               | Hypothetical protein, predicted membrane-associated                                                                      |
| HH1086 | 1056457 | 1057668 | 404 | - |               | Conserved hypothetical protein, similar to Xylella fastidiosa XF1738, predicted membrane-associated                      |
| HH1087 | 1057763 | 1058146 | 128 | - |               | Conserved hypothetical protein, possible transcriptional regulator                                                       |
| HH1088 | 1058235 | 1060208 | 658 | - |               | Conserved hypothetical protein, similar to <i>C. jejuni</i> putative methyl-accepting chemotaxis                         |

|        |         |         |     |   |               |                                                                                                                   |
|--------|---------|---------|-----|---|---------------|-------------------------------------------------------------------------------------------------------------------|
|        |         |         |     |   |               | signal transduction protein CJ1564                                                                                |
| HH1089 | 1060339 | 1060443 | 35  | + |               | Hypothetical protein                                                                                              |
| HH1090 | 1060468 | 1061298 | 277 | + | <i>flgG_1</i> | Flagellar distal rod protein FlgG, similar to HP1092 (FlgG1/FlgF)                                                 |
| HH1091 | 1061331 | 1063019 | 563 | + |               | Type I restriction enzyme, modification subunit                                                                   |
| HH1092 | 1063023 | 1063535 | 171 | + |               | Conserved hypothetical protein                                                                                    |
| HH1093 | 1063535 | 1064245 | 237 | + |               | Conserved hypothetical protein, similar to <i>H. pylori</i> HP1221                                                |
| HH1094 | 1064330 | 1065541 | 404 | + |               | Malate oxidoreductase                                                                                             |
| HH1095 | 1065856 | 1065990 | 45  | - |               | Hypothetical protein                                                                                              |
| HH1096 | 1066087 | 1066548 | 154 | - |               | Hypothetical protein                                                                                              |
| HH1097 | 1066720 | 1067298 | 193 | - |               | Hypothetical protein, predicted secreted protein                                                                  |
| HH1098 | 1067295 | 1068890 | 532 | - |               | Conserved hypothetical protein, similar to <i>H. pylori</i> HP1507                                                |
| HH1099 | 1069035 | 1070012 | 326 | + | <i>lpxD</i>   | UDP-3-O-[3-hydroxymyristoyl] glucosamine N-acyltransferase                                                        |
| HH1100 | 1070053 | 1071429 | 459 | + | <i>sdaC</i>   | Serine transporter                                                                                                |
| HH1101 | 1071441 | 1071545 | 35  | - |               | Hypothetical protein, predicted membrane-associated                                                               |
| HH1102 | 1071565 | 1072686 | 374 | - | <i>cydB</i>   | Cytochrome bd quinol oxidase, subunit II                                                                          |
| HH1103 | 1072689 | 1074260 | 524 | - | <i>cydA</i>   | Cytochrome bd quinol oxidase, subunit I                                                                           |
| HH1104 | 1074290 | 1074538 | 83  | - |               | Conserved hypothetical protein, similar to <i>C. jejuni</i> CJ0080                                                |
| HH1105 | 1074682 | 1077009 | 776 | + |               | Conserved hypothetical protein, similar to <i>C. jejuni</i> CJ0411, predicted ATP/GTP binding protein             |
| HH1106 | 1077025 | 1078866 | 614 | + |               | Conserved hypothetical protein, similar to <i>C. jejuni</i> CJ0412, predicted ATP/GTP binding protein             |
| HH1107 | 1078876 | 1079046 | 57  | + |               | Hypothetical protein, predicted secreted protein                                                                  |
| HH1108 | 1079084 | 1079260 | 59  | + |               | Hypothetical protein                                                                                              |
| HH1109 | 1079410 | 1080597 | 396 | - |               | Conserved hypothetical protein, similar to <i>C. jejuni</i> putative efflux protein CJ1687                        |
| HH1110 | 1080622 | 1081989 | 456 | - | <i>dnaA</i>   | Chromosomal replication initiator protein DnaA                                                                    |
| HH1111 | 1082089 | 1082643 | 185 | + | <i>ruvC</i>   | Holliday junction resolvase RuvC                                                                                  |
| HH1112 | 1082643 | 1084043 | 467 | + |               | Hypothetical protein, predicted membrane-associated                                                               |
| HH1113 | 1084036 | 1084671 | 212 | + |               | Hypothetical protein, predicted membrane-associated                                                               |
| HH1114 | 1084671 | 1085054 | 128 | + |               | Hypothetical protein, predicted secreted protein                                                                  |
| HH1115 | 1085054 | 1086652 | 533 | + |               | Conserved hypothetical protein, similar to <i>N. meningitidis</i> pilin PilQ                                      |
| HH1116 | 1086655 | 1088220 | 522 | + | <i>gspE</i>   | Conserved hypothetical protein, similar to <i>N. meningitidis</i> pilin PilT                                      |
| HH1117 | 1088211 | 1089452 | 414 | + |               | Conserved hypothetical protein, similar to <i>N. meningitidis</i> pilin PilG                                      |
| HH1118 | 1089445 | 1090548 | 368 | - |               | Conserved hypothetical protein                                                                                    |
| HH1119 | 1090590 | 1090730 | 47  | + |               | Hypothetical protein                                                                                              |
| HH1120 | 1090780 | 1091280 | 167 | + |               | Conserved hypothetical protein, similar to <i>H. pylori</i> HP1533                                                |
| HH1121 | 1091292 | 1091885 | 198 | - |               | Hypothetical protein                                                                                              |
| HH1122 | 1091885 | 1092658 | 258 | - |               | Conserved hypothetical protein, similar to <i>H. pylori</i> HP1464, predicted membrane-associated                 |
| HH1123 | 1092646 | 1093449 | 268 | - |               | ABC transporter, ATP-binding component                                                                            |
| HH1124 | 1093449 | 1094492 | 348 | - |               | Conserved hypothetical protein, similar to <i>H. pylori</i> HP1466, predicted ABC transporter, permease component |
| HH1125 | 1094687 | 1094788 | 34  | + |               | Hypothetical protein, predicted membrane-associated                                                               |
| HH1126 | 1094815 | 1095873 | 353 | + | <i>dnaN</i>   | DNA polymerase III, $\beta$ subunit                                                                               |
| HH1127 | 1095901 | 1098216 | 772 | + | <i>gyrB</i>   | DNA gyrase (topoisomerase II), subunit B                                                                          |
| HH1128 | 1098235 | 1099386 | 384 | - |               | Hypothetical protein, predicted secreted protein                                                                  |
| HH1129 | 1099399 | 1100643 | 415 | - |               | Alginate O- acetylation protein, may become fused with HH1130 due to slipped strand mispairing                    |
| HH1130 | 1100837 | 1101136 | 100 | - |               | Alginate O- acetylation protein, may become fused with HH1129 due to slipped strand mispairing                    |
| HH1131 | 1101123 | 1101302 | 60  | - |               | Hypothetical protein, predicted membrane-associated                                                               |

|        |         |         |     |   |               |                                                                                                                 |
|--------|---------|---------|-----|---|---------------|-----------------------------------------------------------------------------------------------------------------|
| HH1132 | 1101308 | 1101466 | 53  | - |               | Hypothetical protein                                                                                            |
| HH1133 | 1101587 | 1101727 | 47  | - |               | Hypothetical protein, predicted secreted protein                                                                |
| HH1134 | 1101730 | 1102677 | 316 | - | <i>leuB</i>   | Isopropylmalate dehydrogenase                                                                                   |
| HH1135 | 1102820 | 1103314 | 165 | - | <i>leuD</i>   | 3-isopropylmalate dehydratase, small subunit                                                                    |
| HH1136 | 1103373 | 1104632 | 420 | - | <i>leuC</i>   | 3-isopropylmalate dehydratase, large subunit                                                                    |
| HH1137 | 1104651 | 1106324 | 558 | - | <i>leuA</i>   | Isopropylmalate synthase                                                                                        |
| HH1138 | 1106496 | 1106693 | 66  | - |               | Hypothetical protein                                                                                            |
| HH1139 | 1106723 | 1106824 | 34  | + |               | Hypothetical protein                                                                                            |
| HH1140 | 1106917 | 1107762 | 282 | + | <i>tal</i>    | Transaldolase                                                                                                   |
| HH1141 | 1107779 | 1108522 | 248 | - |               | Conserved hypothetical protein, similar to <i>H. pylori</i> HP0231, possible protein disulfide isomerase        |
| HH1142 | 1108600 | 1109124 | 175 | + | <i>folK</i>   | 7,8-dihydro-6-hydroxymethylpterin-pyrophosphokinase                                                             |
| HH1143 | 1109219 | 1110667 | 483 | + | <i>flhF</i>   | Flagellar GTP-binding protein FlhF                                                                              |
| HH1144 | 1110683 | 1111552 | 290 | + |               | Conserved hypothetical protein, similar to <i>H. pylori</i> HP1034, predicted ATP-binding protein               |
| HH1145 | 1111580 | 1111933 | 118 | + |               | Conserved hypothetical protein, similar to <i>H. pylori</i> JHP0391, predicted membrane-associated              |
| HH1146 | 1112083 | 1112652 | 190 | + | <i>fliA</i>   | RNA polymerase $\sigma$ 28 factor                                                                               |
| HH1147 | 1112648 | 1113706 | 353 | + | <i>fliM</i>   | Flagellar motor switch protein FliM                                                                             |
| HH1148 | 1113706 | 1114539 | 278 | + | <i>fliY</i>   | Flagellar protein FliY                                                                                          |
| HH1149 | 1114622 | 1114822 | 67  | - |               | Hypothetical protein, predicted membrane-associated                                                             |
| HH1150 | 1114921 | 1115541 | 207 | + |               | Hypothetical protein                                                                                            |
| HH1151 | 1115558 | 1116889 | 444 | + |               | Hypothetical protein                                                                                            |
| HH1152 | 1116993 | 1117565 | 191 | + |               | Hypothetical protein, predicted membrane-associated                                                             |
| HH1153 | 1117568 | 1118536 | 323 | - | <i>trxB_2</i> | Conserved hypothetical protein, similar to <i>H. pylori</i> HP1164, predicted thioredoxin reductase             |
| HH1154 | 1118532 | 1118753 | 74  | - |               | Conserved hypothetical protein, similar to <i>H. pylori</i> HP1163, predicted secreted protein                  |
| HH1155 | 1118909 | 1120576 | 556 | + |               | Conserved hypothetical protein, similar to methyl-accepting chemotaxis proteins                                 |
| HH1156 | 1120607 | 1122490 | 628 | - | <i>recG</i>   | ATP-dependent DNA recombinase RecG                                                                              |
| HH1157 | 1122502 | 1123515 | 338 | - | <i>gap_1</i>  | Glyceraldehyde-3-phosphate dehydrogenase                                                                        |
| HH1158 | 1123611 | 1124372 | 254 | + |               | Hypothetical protein, predicted secreted protein                                                                |
| HH1159 | 1124386 | 1126425 | 680 | - |               | Conserved hypothetical protein, similar to <i>P. aeruginosa</i> PA1689, predicted membrane-associated           |
| HH1160 | 1126573 | 1126884 | 104 | - | <i>trxA</i>   | Thioredoxin                                                                                                     |
| HH1161 | 1126896 | 1127930 | 345 | - |               | Conserved hypothetical protein, similar to <i>C. jejuni</i> putative integral membrane protein                  |
| HH1162 | 1128278 | 1128880 | 201 | - |               | Conserved hypothetical protein, similar to <i>H. pylori</i> JHP1206, predicted secreted protein                 |
| HH1163 | 1128894 | 1129388 | 165 | - |               | Conserved hypothetical protein, predicted transcriptional regulator                                             |
| HH1164 | 1129446 | 1129652 | 69  | + |               | Hypothetical protein                                                                                            |
| HH1165 | 1129745 | 1132213 | 823 | + |               | Conserved hypothetical protein, similar to <i>H. pylori</i> HP0022, predicted membrane-associated               |
| HH1166 | 1132409 | 1133497 | 363 | + | <i>cad</i>    | Putative NADP-dependent alcohol dehydrogenase                                                                   |
| HH1167 | 1133520 | 1134779 | 420 | - | <i>murD</i>   | UDP-N-acetylmuramoylalanine-D-glutamate ligase                                                                  |
| HH1168 | 1134792 | 1135868 | 359 | - | <i>mraY</i>   | Phospho-N-acetylmuramoyl-pentapeptide transferase                                                               |
| HH1169 | 1135976 | 1137445 | 490 | + | <i>pgm</i>    | Phosphoglyceromutase                                                                                            |
| HH1170 | 1137491 | 1138063 | 191 | - |               | Conserved hypothetical protein, similar to <i>C. jejuni</i> putative integral membrane protein CJ1356c          |
| HH1171 | 1138207 | 1138443 | 79  | - |               | Conserved hypothetical protein                                                                                  |
| HH1172 | 1138479 | 1139444 | 322 | - |               | Conserved hypothetical protein, similar to <i>H. pylori</i> putative capsule biosynthesis protein KpsF (HP1429) |
| HH1173 | 1139460 | 1141604 | 715 | - |               | Conserved hypothetical protein, similar to <i>H. pylori</i> HP1430                                              |
| HH1174 | 1141561 | 1142409 | 283 | - | <i>ksgA</i>   | Dimethyladenosine transferase (rRNA methylation)                                                                |
| HH1175 | 1142449 | 1142544 | 32  | + |               | Hypothetical protein                                                                                            |

|        |         |         |     |   |             |                                                                                                      |
|--------|---------|---------|-----|---|-------------|------------------------------------------------------------------------------------------------------|
| HH1176 | 1142585 | 1143337 | 251 | + | <i>hisF</i> | Cyclase HisF                                                                                         |
| HH1177 | 1143435 | 1144046 | 204 | + |             | Conserved hypothetical protein, similar to <i>H. pylori</i> HP1530                                   |
| HH1178 | 1144064 | 1145170 | 369 | + |             | Conserved hypothetical protein, similar to <i>H. pylori</i> HP1428                                   |
| HH1179 | 1145202 | 1145294 | 31  | + |             | Hypothetical protein, predicted membrane-associated                                                  |
| HH1180 | 1145332 | 1146435 | 368 | + |             | Conserved hypothetical protein, similar to <i>H. pylori</i> HP0100                                   |
| HH1181 | 1146482 | 1146988 | 169 | + | <i>fabZ</i> | 3-hydroxymyristoyl-(acyl carrier protein) dehydratase                                                |
| HH1182 | 1147001 | 1147780 | 260 | + | <i>lpxA</i> | UDP-N-acetylglucosamine acyltransferase                                                              |
| HH1183 | 1147776 | 1149053 | 426 | + | <i>clpX</i> | ATP-dependent Clp protease, ATP-binding subunit ClpX                                                 |
| HH1184 | 1149139 | 1150170 | 344 | + | <i>mreB</i> | Rod shape-determining protein MreB                                                                   |
| HH1185 | 1150182 | 1151066 | 295 | + | <i>mreC</i> | Rod shape-determining protein MreC                                                                   |
| HH1186 | 1150987 | 1153287 | 767 | + |             | Hypothetical protein                                                                                 |
| HH1187 | 1153450 | 1154889 | 480 | + |             | Hypothetical protein, predicted secreted protein                                                     |
| HH1188 | 1154913 | 1156157 | 415 | + |             | Hypothetical protein                                                                                 |
| HH1189 | 1156160 | 1157095 | 312 | - |             | Conserved hypothetical protein, similar to <i>C. jejuni</i> CJ0021c, predicted isomerase             |
| HH1190 | 1157210 | 1159999 | 930 | + | <i>ileS</i> | Isoleucyl-tRNA synthetase                                                                            |
| HH1191 | 1160044 | 1160187 | 48  | + |             | Hypothetical protein, predicted membrane-associated                                                  |
| HH1192 | 1160209 | 1160730 | 174 | - |             | Hypothetical protein, predicted secreted protein                                                     |
| HH1193 | 1160896 | 1161225 | 110 | + |             | Conserved hypothetical protein, similar to <i>C. jejuni</i> putative coiled-coil protein             |
| HH1194 | 1161212 | 1161520 | 103 | + |             | Conserved hypothetical protein, similar to <i>H. pylori</i> HP1391, predicted membrane-associated    |
| HH1195 | 1161593 | 1162438 | 282 | + |             | Hypothetical protein, predicted secreted protein                                                     |
| HH1196 | 1162686 | 1164887 | 734 | - |             | Isocitrate dehydrogenase                                                                             |
| HH1197 | 1165037 | 1165243 | 69  | - |             | Hypothetical protein                                                                                 |
| HH1198 | 1165392 | 1166435 | 348 | - |             | Conserved hypothetical protein, similar to <i>C. jejuni</i> CJ1633                                   |
| HH1199 | 1166416 | 1167972 | 519 | - | <i>dnaG</i> | DNA primase                                                                                          |
| HH1200 | 1168356 | 1168625 | 90  | + | <i>hspA</i> | Chaperone protein HspA (GroES/HSP10 family)                                                          |
| HH1201 | 1168662 | 1170296 | 545 | + | <i>hspB</i> | Chaperone protein HspB (GroEL/HSP60 family)                                                          |
| HH1202 | 1170406 | 1171128 | 241 | - |             | Hypothetical protein                                                                                 |
| HH1203 | 1171134 | 1173830 | 899 | - | <i>ppc</i>  | Phosphoenolpyruvate carboxylase                                                                      |
| HH1204 | 1173945 | 1174967 | 341 | + | <i>ilvC</i> | Ketol-acid reductoisomerase                                                                          |
| HH1205 | 1175065 | 1176462 | 466 | + | <i>ktrB</i> | Conserved hypothetical protein, predicted Na <sup>+</sup> or K <sup>+</sup> uptake protein           |
| HH1206 | 1176490 | 1177146 | 219 | + | <i>ktrA</i> | Conserved hypothetical protein, predicted potassium uptake protein                                   |
| HH1207 | 1177142 | 1177900 | 253 | - | <i>bioC</i> | Conserved hypothetical protein, predicted biotin biosynthesis protein BioC                           |
| HH1208 | 1177882 | 1178574 | 231 | - |             | Conserved hypothetical protein, similar to <i>C. jejuni</i> CJ0305c, predicted membrane-associated   |
| HH1209 | 1178574 | 1179767 | 398 | - | <i>bioF</i> | 8-amino-7-oxononanoate synthase                                                                      |
| HH1210 | 1179847 | 1181157 | 437 | + | <i>bioA</i> | Adenosylmethionine-8-amino-7-oxononanoate aminotranferase                                            |
| HH1211 | 1181165 | 1181791 | 209 | - | <i>bioD</i> | Dethiobiotin synthetase                                                                              |
| HH1212 | 1181832 | 1182758 | 309 | - |             | Conserved hypothetical protein, similar to <i>P. aeruginosa</i> PA3954                               |
| HH1213 | 1182758 | 1182898 | 47  | - |             | Hypothetical protein                                                                                 |
| HH1214 | 1182876 | 1183880 | 335 | - |             | Conserved hypothetical protein, similar to Bacillus halodurans BH0835                                |
| HH1215 | 1183873 | 1185315 | 481 | - |             | Conserved hypothetical protein, similar to <i>P. aeruginosa</i> PA2326                               |
| HH1216 | 1185659 | 1185919 | 87  | - |             | Hypothetical protein, predicted secreted protein                                                     |
| HH1217 | 1186029 | 1186235 | 69  | + |             | Hypothetical protein, predicted secreted protein                                                     |
| HH1218 | 1186430 | 1186753 | 108 | - | <i>cutA</i> | Divalent cation tolerance protein CutA                                                               |
| HH1219 | 1186887 | 1187858 | 324 | + |             | Conserved hypothetical protein, similar to <i>H. pylori</i> JHP0437, predicted catalase-like protein |

|        |         |         |     |   |             |                                                                                                                   |
|--------|---------|---------|-----|---|-------------|-------------------------------------------------------------------------------------------------------------------|
| HH1220 | 1187868 | 1188959 | 364 | - |             | Conserved hypothetical protein, similar to <i>V. cholerae</i> VCA0834, predicted membrane-associated              |
| HH1221 | 1189082 | 1190293 | 404 | + | <i>argG</i> | Argininosuccinate synthase                                                                                        |
| HH1222 | 1190297 | 1191811 | 505 | + |             | Conserved hypothetical protein, similar to <i>H. pylori</i> JHP0197, predicted secreted protein                   |
| HH1223 | 1191873 | 1192685 | 271 | + | <i>minD</i> | Cell division inhibitor MinD                                                                                      |
| HH1224 | 1192685 | 1192918 | 78  | + | <i>minE</i> | Bacterial cell division topological specificity factor MinE                                                       |
| HH1225 | 1192921 | 1193034 | 38  | - |             | Hypothetical protein                                                                                              |
| HH1226 | 1193051 | 1193917 | 289 | + |             | Conserved hypothetical protein, similar to <i>C. jejuni</i> putative periplasmic protein CJ0633                   |
| HH1227 | 1193930 | 1194718 | 263 | + | <i>dprA</i> | DNA processing protein DprA, possibly involved in DNA uptake                                                      |
| HH1228 | 1194781 | 1195119 | 113 | + |             | Hypothetical protein, predicted membrane-associated                                                               |
| HH1229 | 1195122 | 1195535 | 138 | + |             | Conserved hypothetical protein, similar to <i>C. jejuni</i> CJ0635                                                |
| HH1230 | 1195703 | 1196134 | 144 | + |             | Conserved hypothetical protein, similar to <i>C. jejuni</i> integral membrane protein                             |
| HH1231 | 1196390 | 1197559 | 390 | + |             | Hypothetical protein, predicted secreted protein                                                                  |
| HH1232 | 1197570 | 1198058 | 163 | - |             | Conserved hypothetical protein, similar to <i>C. jejuni</i> CJ0121                                                |
| HH1233 | 1198153 | 1200003 | 617 | + | <i>speA</i> | Arginine decarboxylase                                                                                            |
| HH1234 | 1200006 | 1200707 | 234 | + | <i>cysE</i> | Serine acetyltransferase                                                                                          |
| HH1235 | 1200722 | 1201744 | 341 | - |             | Conserved hypothetical protein, similar to <i>H. pylori</i> HP0948, predicted membrane-associated                 |
| HH1236 | 1201747 | 1202100 | 118 | - | <i>dksA</i> | DnaK suppressor protein DskA                                                                                      |
| HH1237 | 1202113 | 1202502 | 130 | - |             | Conserved hypothetical protein, similar to <i>H. pylori</i> HP0949                                                |
| HH1238 | 1202546 | 1203421 | 292 | - | <i>accD</i> | Acetyl-CoA carboxylase, $\beta$ subunit                                                                           |
| HH1239 | 1203427 | 1204170 | 248 | - | <i>suhB</i> | Conserved hypothetical protein, similar to <i>C. jejuni</i> CJ0128c, predicted extragenic suppressor protein SuhB |
| HH1240 | 1204239 | 1204862 | 208 | + |             | Conserved hypothetical protein, similar to <i>H. pylori</i> HP0951                                                |
| HH1241 | 1204978 | 1206327 | 450 | + | <i>gdhA</i> | Glutamate dehydrogenase                                                                                           |
| HH1242 | 1206418 | 1207467 | 350 | - | <i>mutY</i> | A/G-specific adenine glycosylase                                                                                  |
| HH1243 | 1207616 | 1208818 | 401 | + | <i>ndh</i>  | NADH dehydrogenase Ndh                                                                                            |
| HH1244 | 1209054 | 1209734 | 227 | + |             | Adenine-specific DNA methylase                                                                                    |
| HH1245 | 1209808 | 1210812 | 335 | + | <i>purM</i> | AIR synthetase (FGAM cyclase) PurM                                                                                |
| HH1246 | 1210831 | 1211619 | 263 | + |             | Hypothetical protein, predicted secreted protein                                                                  |
| HH1247 | 1211625 | 1212428 | 268 | + | <i>aroE</i> | Shikimate 5-dehydrogenase                                                                                         |
| HH1248 | 1212487 | 1212762 | 92  | + | <i>gatC</i> | Glu-tRNA <sup>Gln</sup> amidotransferase, subunit C                                                               |
| HH1249 | 1212762 | 1213466 | 235 | + | <i>ung</i>  | Uracil DNA glycosylase                                                                                            |
| HH1250 | 1213479 | 1215173 | 565 | - | <i>kefB</i> | Glutathione-regulated potassium-efflux system protein KefB                                                        |
| HH1251 | 1215345 | 1216601 | 419 | + |             | Conserved hypothetical protein, similar to <i>C. jejuni</i> CJ0846, predicted membrane-associated                 |
| HH1252 | 1216753 | 1217448 | 232 | + |             | Conserved hypothetical protein, similar to <i>C. jejuni</i> CJ0343c, predicted membrane-associated                |
| HH1253 | 1217541 | 1217687 | 49  | - |             | Hypothetical protein                                                                                              |
| HH1254 | 1217707 | 1218492 | 262 | + |             | Conserved hypothetical protein, similar to <i>C. jejuni</i> CJ1613c                                               |
| HH1255 | 1218550 | 1219818 | 423 | + |             | Conserved hypothetical protein, similar to <i>H. pylori</i> HP0728, predicted PP-loop superfamily ATPase          |
| HH1256 | 1219927 | 1221387 | 487 | + | <i>fixN</i> | Cb-type cytochrome C oxidase subunit I                                                                            |
| HH1257 | 1221406 | 1222143 | 246 | + | <i>fixO</i> | Cb-type cytochrome C oxidase subunit II                                                                           |
| HH1258 | 1222143 | 1222370 | 76  | + | <i>fixQ</i> | Cb-type cytochrome C oxidase subunit IV                                                                           |
| HH1259 | 1222370 | 1223239 | 290 | + | <i>fixP</i> | Cb-type cytochrome C oxidase subunit III                                                                          |
| HH1260 | 1223254 | 1223451 | 66  | + |             | Conserved hypothetical protein, similar to <i>C. jejuni</i> putative periplasmic protein                          |
| HH1261 | 1223464 | 1223568 | 35  | + |             | Hypothetical protein, predicted membrane-associated                                                               |
| HH1262 | 1223575 | 1224246 | 224 | + |             | Conserved hypothetical protein, similar to <i>H. pylori</i> HP0149, predicted secreted protein                    |
| HH1263 | 1224266 | 1224895 | 210 | + |             | Hypothetical protein, predicted secreted protein                                                                  |

|        |         |         |        |   |             |                                                                                                           |
|--------|---------|---------|--------|---|-------------|-----------------------------------------------------------------------------------------------------------|
| HH1264 | 1224908 | 1225204 | 99     | + |             | Hypothetical protein, predicted secreted protein                                                          |
| HH1265 | 1225207 | 1225968 | 254    | + |             | Hypothetical protein                                                                                      |
| HH1266 | 1226034 | 1226375 | 114    | + |             | Hypothetical protein                                                                                      |
| HH1267 | 1226460 | 1227647 | 396    | + |             | Conserved hypothetical protein, similar to <i>C. jejuni</i> CJ1687, predicted efflux protein              |
| HH1268 | 1227665 | 1230562 | 966    | - | <i>dld</i>  | Conserved hypothetical protein, similar to <i>H. pylori</i> HP1222, predicted D-lactate dehydrogenase Dld |
| HH1269 | 1230617 | 1231030 | 138    | - |             | Conserved hypothetical protein, similar to <i>C. jejuni</i> CJ0950c, predicted secreted protein           |
| HH1270 | 1231087 | 1234740 | 1218   | - | <i>dnaE</i> | DNA-dependent DNA polymerase III, $\alpha$ chain                                                          |
| HH1271 | 1234897 | 1236297 | 467    | + |             | Hypothetical protein, predicted secreted protein                                                          |
| HH1272 | 1236300 | 1237424 | 375    | - | <i>nusA</i> | Transcription termination factor NusA                                                                     |
| HH1273 | 1237600 | 1237857 | 86     | + |             | Conserved hypothetical protein, similar to <i>C. jejuni</i> CJ0459c                                       |
| HH1274 | 1237945 | 1239273 | 443    | + |             | Conserved hypothetical protein, similar to <i>H. pylori</i> HP0269                                        |
| HH1275 | 1239270 | 1239911 | 214    | + |             | Conserved hypothetical protein, similar to <i>H. pylori</i> HP0270                                        |
| HH1276 | 1239977 | 1241014 | 346    | + |             | Hypothetical protein                                                                                      |
| HH1277 | 1241021 | 1241566 | 182    | + |             | Conserved hypothetical protein, similar to <i>H. pylori</i> HP0272, predicted secreted protein            |
| HH1278 | 1241562 | 1242140 | 193    | + |             | Hypothetical protein, predicted membrane-associated                                                       |
| HH1279 | 1242153 | 1243103 | 317    | + |             | Conserved hypothetical protein, similar to <i>H. pylori</i> HP0707                                        |
| HH1280 | 1243107 | 1243472 | 122    | + |             | Conserved hypothetical protein, similar to <i>C. jejuni</i> CJ0692c, predicted membrane-associated        |
| HH1281 | 1243550 | 1243645 | 32     | + |             | Hypothetical protein                                                                                      |
| HH1282 | 1243793 | 1244677 | 295    | + | <i>fabD</i> | Malonyl CoA-acyl carrier protein transacylase                                                             |
| HH1283 | 1244695 | 1245390 | 232    | + |             | S-adenosylhomocysteine nucleosidase                                                                       |
| HH1284 | 1245405 | 1245920 | 172    | + |             | Conserved hypothetical protein, similar to <i>C. jejuni</i> CJ1002c                                       |
| HH1285 | 1245933 | 1246400 | 156    | + |             | Conserved hypothetical protein, similar to <i>N. meningitidis</i> pilin Pile                              |
| HH1286 | 1246807 | 1247655 | 283    | - |             | Conserved hypothetical protein, similar to <i>C. jejuni</i> CJ1467                                        |
| HH1287 | 1247726 | 1249078 | 451    | + |             | Conserved hypothetical protein, similar to <i>H. pylori</i> HP1489, predicted secreted protein            |
| HH1288 | 1249103 | 1250074 | 324    | + |             | Conserved hypothetical protein, similar to <i>H. pylori</i> HP1488, predicted secreted protein            |
| HH1289 | 1250147 | 1250332 | 62     | + | <i>rpmB</i> | Ribosomal protein L28                                                                                     |
| HH1290 | 1250353 | 1251477 | 375    | + |             | Conserved hypothetical protein, similar to <i>H. pylori</i> HP0490, predicted potassium channel           |
| HH1291 | 1251473 | 1252684 | 37.923 | + |             | Ornithine acetyltransferase                                                                               |
| HH1292 | 1252803 | 1253021 | 73     | + |             | Conserved hypothetical protein                                                                            |
| HH1293 | 1253203 | 1253325 | 41     | + |             | Hypothetical protein                                                                                      |
| HH1294 | 1253517 | 1254881 | 455    | - |             | Fibronectin/fibrinogen-binding protein                                                                    |
| HH1295 | 1254907 | 1256445 | 513    | - | <i>recN</i> | DNA repair protein RecN                                                                                   |
| HH1296 | 1256463 | 1257365 | 301    | - |             | Conserved hypothetical protein, possible kinase                                                           |
| HH1297 | 1257377 | 1257982 | 202    | - |             | Hypothetical protein, predicted secreted protein                                                          |
| HH1298 | 1258222 | 1259445 | 408    | + |             | Conserved hypothetical protein, similar to <i>C. jejuni</i> putative integral membrane protein            |
| HH1299 | 1259460 | 1259696 | 79     | + |             | Conserved hypothetical protein, similar to <i>C. jejuni</i> CJ1501                                        |
| HH1300 | 1259771 | 1259890 | 40     | + |             | Hypothetical protein                                                                                      |
| HH1301 | 1259972 | 1260487 | 172    | + |             | Hypothetical protein                                                                                      |
| HH1302 | 1260715 | 1261968 | 418    | + |             | Hypothetical protein                                                                                      |
| HH1303 | 1262036 | 1262215 | 60     | + |             | Hypothetical protein                                                                                      |
| HH1304 | 1262296 | 1262904 | 203    | + |             | Conserved hypothetical protein, similar to <i>H. pylori</i> Hop-family proteins                           |
| HH1305 | 1262967 | 1264160 | 398    | - |             | Hypothetical protein, predicted secreted protein                                                          |
| HH1306 | 1264186 | 1265091 | 302    | - |             | Conserved hypothetical protein, similar to <i>H. pylori</i> HP1336                                        |
| HH1307 | 1265218 | 1265691 | 158    | - |             | Conserved hypothetical protein, similar to <i>Archaeoglobus fulgidus</i> AF2335                           |

|        |         |         |     |   |               |                                                                                                                   |
|--------|---------|---------|-----|---|---------------|-------------------------------------------------------------------------------------------------------------------|
| HH1308 | 1265776 | 1266978 | 401 | - | <i>ackA</i>   | Acetate kinase                                                                                                    |
| HH1309 | 1267001 | 1267993 | 331 | - | <i>pta</i>    | Phosphotransacetylase                                                                                             |
| HH1310 | 1268188 | 1270191 | 668 | - |               | Methyl-accepting chemotaxis protein                                                                               |
| HH1311 | 1270288 | 1271631 | 448 | - |               | Conserved hypothetical protein, similar to <i>C. jejuni</i> CJ1454c                                               |
| HH1312 | 1271792 | 1272382 | 197 | + |               | Hypothetical protein, predicted secreted protein                                                                  |
| HH1313 | 1272385 | 1273212 | 276 | - |               | Enoyl-[acyl-carrier-protein] reductase (NADH)                                                                     |
| HH1314 | 1273345 | 1273728 | 128 | + |               | Hypothetical protein, predicted secreted protein                                                                  |
| HH1315 | 1273746 | 1274450 | 235 | - | <i>tpi</i>    | Triosephosphate isomerase                                                                                         |
| HH1316 | 1274627 | 1275685 | 353 | + | <i>yhjA</i>   | Cytochrome c551 peroxidase                                                                                        |
| HH1317 | 1275810 | 1278545 | 912 | + | <i>polA</i>   | DNA polymerase I                                                                                                  |
| HH1318 | 1278675 | 1278977 | 101 | + |               | Hypothetical protein                                                                                              |
| HH1319 | 1279263 | 1280435 | 391 | - |               | Conserved hypothetical protein, similar to <i>H. pylori</i> HP1487, predicted membrane-associated                 |
| HH1320 | 1280435 | 1280710 | 92  | - | <i>flhB_2</i> | Flagellar basal body protein FlhB, similar to <i>H. pylori</i> HP1575 (FlhB2)                                     |
| HH1321 | 1280722 | 1281357 | 212 | - | <i>ribC</i>   | Riboflavin synthase, $\alpha$ chain                                                                               |
| HH1322 | 1281447 | 1282241 | 265 | + |               | Conserved hypothetical protein                                                                                    |
| HH1323 | 1282265 | 1283386 | 374 | + | <i>dniR</i>   | Conserved hypothetical protein, similar to <i>H. pylori</i> HP1572, possibly regulatory protein DniR              |
| HH1324 | 1283404 | 1284297 | 298 | + | <i>rlpA</i>   | Rare lipoprotein A                                                                                                |
| HH1325 | 1284326 | 1284934 | 203 | + | <i>hisB</i>   | Imidazoleglycerol-phosphate dehydratase                                                                           |
| HH1326 | 1284934 | 1285425 | 164 | + |               | Conserved hypothetical protein, similar to <i>H. pylori</i> HP1570                                                |
| HH1327 | 1285394 | 1285939 | 182 | + |               | Conserved hypothetical protein, predicted secreted protein                                                        |
| HH1328 | 1285942 | 1286409 | 156 | + |               | Conserved hypothetical protein, similar to <i>H. pylori</i> HP1568, predicted membrane-associated                 |
| HH1329 | 1286457 | 1287122 | 222 | + |               | Conserved hypothetical protein, possible ATP/GTP binding protein                                                  |
| HH1330 | 1287115 | 1287582 | 156 | + |               | Conserved hypothetical protein, similar to Aquifex aeolicus AQ1359, predicted acetyltransferase                   |
| HH1331 | 1287549 | 1287998 | 150 | + |               | Hypothetical protein, predicted membrane-associated                                                               |
| HH1332 | 1287998 | 1289782 | 595 | + |               | Penicillin-binding protein                                                                                        |
| HH1333 | 1289800 | 1290795 | 332 | + | <i>flmA</i>   | Flagellar glycosylation protein FlmA                                                                              |
| HH1334 | 1290872 | 1291363 | 164 | + |               | Ferritin                                                                                                          |
| HH1335 | 1291455 | 1292693 | 413 | + | <i>dfp</i>    | Pantothenate metabolism flavoprotein                                                                              |
| HH1336 | 1292693 | 1293421 | 243 | + |               | Conserved hypothetical protein, similar to <i>H. pylori</i> HP0842                                                |
| HH1337 | 1293461 | 1295563 | 701 | - |               | Conserved hypothetical protein, similar to <i>C. jejuni</i> putative MCP-type signal transduction protein CJ1506c |
| HH1338 | 1295669 | 1296043 | 125 | - |               | Conserved hypothetical protein, similar to <i>C. jejuni</i> CJ0977                                                |
| HH1339 | 1296081 | 1296176 | 32  | + |               | Hypothetical protein                                                                                              |
| HH1340 | 1296140 | 1297084 | 315 | - |               | Conserved hypothetical protein, similar to <i>C. jejuni</i> CJ0976, predicted methyltransferase                   |
| HH1341 | 1297065 | 1298105 | 347 | - |               | Conserved hypothetical protein, similar to <i>H. pylori</i> HP0418                                                |
| HH1342 | 1298127 | 1300055 | 643 | - | <i>metG</i>   | Methionyl-tRNA synthetase                                                                                         |
| HH1343 | 1300078 | 1300275 | 66  | - |               | Conserved hypothetical protein, similar to <i>H. pylori</i> HP1384                                                |
| HH1344 | 1300271 | 1301107 | 279 | - | <i>fbp</i>    | Fructose-1,6-biphosphatase                                                                                        |
| HH1345 | 1301158 | 1301850 | 231 | - |               | Hypothetical protein                                                                                              |
| HH1346 | 1301932 | 1302579 | 216 | + | <i>rpe</i>    | Ribulose-phosphate 3-epimerase                                                                                    |
| HH1347 | 1302588 | 1303385 | 266 | + | <i>dnaQ</i>   | DNA polymerase III, $\epsilon$ subunit                                                                            |
| HH1348 | 1303369 | 1304205 | 279 | - | <i>hemK</i>   | Possible DNA methylase HemK                                                                                       |
| HH1349 | 1304198 | 1305421 | 408 | - |               | Zinc-metallo protease                                                                                             |
| HH1350 | 1305554 | 1307173 | 540 | + | <i>pyrG</i>   | CTP synthase (UTP-ammonia lyase)                                                                                  |
| HH1351 | 1307193 | 1308758 | 522 | + | <i>recJ</i>   | Single-stranded DNA-specific exonuclease                                                                          |

|        |         |         |     |   |               |                                                                                                            |
|--------|---------|---------|-----|---|---------------|------------------------------------------------------------------------------------------------------------|
| HH1352 | 1308778 | 1309554 | 259 | - |               | Conserved hypothetical protein, similar to <i>C. jejuni</i> CJ1056c                                        |
| HH1353 | 1309759 | 1311087 | 443 | + | <i>purB</i>   | Adenylosuccinate lyase PurB                                                                                |
| HH1354 | 1311071 | 1311646 | 192 | - |               | Conserved hypothetical protein, similar to <i>H. pylori</i> conserved hypothetical mitochondrial protein 4 |
| HH1355 | 1311655 | 1312266 | 204 | - | <i>pyrE</i>   | Orotate phosphoribosyltransferase                                                                          |
| HH1356 | 1312284 | 1312961 | 226 | - |               | Hypothetical protein                                                                                       |
| HH1357 | 1313105 | 1313608 | 168 | + |               | Conserved hypothetical protein, similar to <i>H. pylori</i> HP1028, predicted secreted protein             |
| HH1358 | 1313613 | 1315724 | 704 | + |               | DNA helicase II                                                                                            |
| HH1359 | 1315724 | 1316638 | 305 | + |               | Hypothetical protein , predicted secreted protein                                                          |
| HH1360 | 1316695 | 1317285 | 197 | + | <i>ubiD</i>   | Phenylacrylic acid decarboxylase                                                                           |
| HH1361 | 1317288 | 1317782 | 165 | + | <i>kdtB</i>   | Lipopolysaccharid core biosynthesis protein                                                                |
| HH1362 | 1317785 | 1318369 | 195 | + | <i>tmk</i>    | Thymidylate kinase                                                                                         |
| HH1363 | 1318376 | 1318984 | 203 | + |               | Conserved hypothetical protein                                                                             |
| HH1364 | 1319075 | 1320598 | 508 | + | <i>flaA_1</i> | Major flagellin subunit FlaA_1                                                                             |
| HH1365 | 1320663 | 1320986 | 108 | - |               | Conserved hypothetical protein, predicted secreted protein                                                 |
| HH1366 | 1321061 | 1321918 | 286 | + | <i>folD</i>   | Methylenetetrahydrofolate dehydrogenase                                                                    |
| HH1367 | 1321918 | 1322928 | 337 | + | <i>lepB</i>   | Signal peptidase I                                                                                         |
| HH1368 | 1322943 | 1323383 | 147 | + | <i>rpiB</i>   | Ribose 5-phosphate isomerase RpiB                                                                          |
| HH1369 | 1323402 | 1323752 | 117 | + |               | Conserved hypothetical protein, similar to <i>C. jejuni</i> putative membrane protein                      |
| HH1370 | 1323783 | 1324316 | 178 | + | <i>apt</i>    | Adenine phosphoribosyltransferase                                                                          |
| HH1371 | 1324319 | 1325077 | 253 | + |               | Conserved hypothetical protein, similar to <i>H. pylori</i> HP0571, predicted membrane-associated          |
| HH1372 | 1325120 | 1326541 | 474 | + | <i>pepA</i>   | Aminopeptidase                                                                                             |
| HH1373 | 1326545 | 1327642 | 366 | + |               | Conserved hypothetical protein, possible GTP-binding protein                                               |
| HH1374 | 1327844 | 1328068 | 75  | - |               | Hypothetical protein                                                                                       |
| HH1375 | 1328068 | 1328511 | 148 | - |               | Hypothetical protein                                                                                       |
| HH1376 | 1328511 | 1329365 | 285 | - |               | Hypothetical protein                                                                                       |
| HH1377 | 1329706 | 1330014 | 103 | + | <i>rpsJ</i>   | Ribosomal protein S10                                                                                      |
| HH1378 | 1330100 | 1330648 | 183 | + | <i>rplC</i>   | Ribosomal protein L3                                                                                       |
| HH1379 | 1330663 | 1331283 | 207 | + | <i>rplD</i>   | Ribosomal protein L4                                                                                       |
| HH1380 | 1331287 | 1331565 | 93  | + | <i>rplW</i>   | Ribosomal protein L23                                                                                      |
| HH1381 | 1331578 | 1332402 | 275 | + | <i>rplB</i>   | Ribosomal protein L2                                                                                       |
| HH1382 | 1332416 | 1332694 | 93  | + | <i>rpsS</i>   | Ribosomal protein S19                                                                                      |
| HH1383 | 1332707 | 1333276 | 190 | + | <i>rplV</i>   | Ribosomal protein L22                                                                                      |
| HH1384 | 1333282 | 1333989 | 236 | + | <i>rpsC</i>   | Ribosomal protein S3                                                                                       |
| HH1385 | 1333996 | 1334418 | 141 | + | <i>rplP</i>   | Ribosomal protein L16/L10E                                                                                 |
| HH1386 | 1334408 | 1334593 | 62  | + | <i>rpmC</i>   | Ribosomal protein L29                                                                                      |
| HH1387 | 1334600 | 1334863 | 88  | + | <i>rpsQ</i>   | Ribosomal protein S17                                                                                      |
| HH1388 | 1334863 | 1335228 | 122 | + | <i>rplN</i>   | Ribosomal protein L14                                                                                      |
| HH1389 | 1335231 | 1335464 | 78  | + | <i>rplX</i>   | Ribosomal protein L24                                                                                      |
| HH1390 | 1335467 | 1336009 | 181 | + | <i>rplE</i>   | Ribosomal protein L5                                                                                       |
| HH1391 | 1336033 | 1336143 | 37  | + |               | Conserved hypothetical protein, similar to <i>H. pylori</i> JHP1226                                        |
| HH1392 | 1336209 | 1336601 | 131 | + | <i>rpsH</i>   | Ribosomal protein S8                                                                                       |
| HH1393 | 1336614 | 1337147 | 178 | + | <i>rplF</i>   | Ribosomal protein L6                                                                                       |
| HH1394 | 1337166 | 1337519 | 118 | + | <i>rplR</i>   | Ribosomal protein L18                                                                                      |
| HH1395 | 1337532 | 1337969 | 146 | + | <i>rpsE</i>   | Ribosomal protein S5                                                                                       |



|        |         |         |      |   |             |                                                                           |
|--------|---------|---------|------|---|-------------|---------------------------------------------------------------------------|
| HH1396 | 1337983 | 1338381 | 133  | + | <i>rplO</i> | Ribosomal protein L15                                                     |
| HH1397 | 1338381 | 1339628 | 416  | + | <i>secY</i> | Preprotein translocase, subunit SecY                                      |
| HH1398 | 1339633 | 1340388 | 252  | + | <i>map</i>  | Methionine aminopeptidase                                                 |
| HH1399 | 1340394 | 1340609 | 72   | + | <i>infA</i> | Translation initiation factor IF-1                                        |
| HH1400 | 1340816 | 1341175 | 120  | + | <i>rpsM</i> | Ribosomal protein S13                                                     |
| HH1401 | 1341188 | 1341577 | 130  | + | <i>rpsK</i> | Ribosomal protein S11                                                     |
| HH1402 | 1341591 | 1342214 | 208  | + | <i>rpsD</i> | Ribosomal protein S4                                                      |
| HH1403 | 1342245 | 1343246 | 334  | + | <i>rpoA</i> | DNA-dependent RNA polymerase, $\alpha$ subunit                            |
| HH1404 | 1343264 | 1343611 | 116  | + | <i>rplQ</i> | Ribosomal protein L17                                                     |
| HH1405 | 1344048 | 1345616 | 523  | + |             | Hypothetical protein                                                      |
| HH1406 | 1345664 | 1346782 | 373  | + |             | Hypothetical protein, predicted secreted protein                          |
| HH1407 | 1346855 | 1347286 | 144  | + | <i>flgB</i> | Flagellar basal body rod protein FlgB                                     |
| HH1408 | 1347308 | 1347796 | 163  | + | <i>flgC</i> | Flagellar basal body rod protein FlgC                                     |
| HH1409 | 1347809 | 1348117 | 103  | + | <i>fliE</i> | Flagellar hook-basal body protein FliE                                    |
| HH1410 | 1348129 | 1349919 | 597  | + |             | Conserved hypothetical protein, probable penicillin-binding protein       |
| HH1411 | 1349931 | 1350068 | 46   | + |             | Hypothetical protein                                                      |
| HH1412 | 1350151 | 1350702 | 184  | + |             | Conserved hypothetical protein, similar to <i>H. pylori</i> JHP0216       |
| HH1413 | 1350705 | 1353566 | 954  | - |             | Hypothetical protein, predicted membrane-associated                       |
| HH1414 | 1353573 | 1354373 | 267  | - | <i>trpA</i> | Tryptophan synthase, $\alpha$ chain                                       |
| HH1415 | 1354518 | 1355777 | 420  | + | <i>trpB</i> | Tryptophan synthase, $\beta$ chain                                        |
| HH1416 | 1355797 | 1356162 | 122  | - |             | Conserved hypothetical protein, similar to <i>C. jejuni</i> CJ1112c       |
| HH1417 | 1356167 | 1357156 | 330  | - |             | Hypothetical protein, predicted secreted protein                          |
| HH1418 | 1357286 | 1360003 | 906  | + |             | Hypothetical protein                                                      |
| HH1419 | 1360016 | 1360954 | 313  | + |             | Hypothetical protein                                                      |
| HH1420 | 1360957 | 1363023 | 689  | + |             | Hypothetical protein                                                      |
| HH1421 | 1363026 | 1364291 | 422  | + |             | Hypothetical protein                                                      |
| HH1422 | 1364426 | 1365439 | 338  | + |             | Conserved hypothetical protein, similar to <i>N. meningitidis</i> NMA1635 |
| HH1423 | 1365552 | 1366976 | 475  | + |             | Type I restriction-modification system, methyltransferase subunit         |
| HH1424 | 1367061 | 1368365 | 435  | + |             | Conserved hypothetical protein, possible arsenical pump membrane protein  |
| HH1425 | 1368440 | 1370014 | 525  | + |             | Hypothetical protein                                                      |
| HH1426 | 1370098 | 1370937 | 280  | + |             | Conserved hypothetical protein, similar to <i>C. jejuni</i> CJ1420c       |
| HH1427 | 1370990 | 1371772 | 261  | + |             | Conserved hypothetical protein, possible methyltransferase                |
| HH1428 | 1371816 | 1373405 | 530  | + |             | Hypothetical protein                                                      |
| HH1429 | 1373504 | 1374196 | 231  | + |             | Hypothetical protein                                                      |
| HH1430 | 1374211 | 1374549 | 113  | + |             | Hypothetical protein                                                      |
| HH1431 | 1374657 | 1374986 | 110  | + |             | Hypothetical protein                                                      |
| HH1432 | 1375002 | 1375511 | 170  | + |             | Hypothetical protein, predicted secreted protein                          |
| HH1433 | 1375515 | 1375688 | 58   | + |             | Hypothetical protein                                                      |
| HH1434 | 1376248 | 1379739 | 1164 | + |             | Type I restriction/modification enzyme                                    |
| HH1435 | 1379811 | 1380458 | 216  | + |             | Conserved hypothetical protein, possible restriction/modification enzyme  |
| HH1436 | 1380629 | 1382959 | 777  | + |             | Conserved hypothetical protein, similar to <i>C. jejuni</i> CJ1418c       |
| HH1437 | 1382959 | 1383588 | 210  | + |             | Conserved hypothetical protein, similar to <i>C. jejuni</i> CJ1417c       |
| HH1438 | 1383594 | 1384196 | 201  | + | <i>cysC</i> | Adenylylsulfate kinase                                                    |
| HH1439 | 1384199 | 1384954 | 252  | + |             | Conserved hypothetical protein, possible sugar nucleotidyltransferase     |

|        |         |         |      |   |             |                                                                                                                     |
|--------|---------|---------|------|---|-------------|---------------------------------------------------------------------------------------------------------------------|
| HH1440 | 1385005 | 1385802 | 266  | + | <i>cysQ</i> | Conserved hypothetical protein, probable CysQ protein homolog                                                       |
| HH1441 | 1386020 | 1386409 | 130  | - |             | Conserved hypothetical protein, similar to <i>C. jejuni</i> CJ1137c                                                 |
| HH1442 | 1386468 | 1387922 | 485  | - |             | Conserved hypothetical protein, similar to <i>C. jejuni</i> CJ0140                                                  |
| HH1443 | 1387900 | 1389909 | 670  | - |             | Putative endonuclease                                                                                               |
| HH1444 | 1390108 | 1394232 | 1375 | + | <i>guaA</i> | Guanosine monophosphate synthetase GuaA                                                                             |
| HH1445 | 1394487 | 1394810 | 108  | + |             | Conserved hypothetical protein, similar to <i>H. pylori</i> type II DNA modification enzyme JHP0045                 |
| HH1446 | 1395180 | 1395872 | 231  | + | <i>cdtA</i> | Cytolethal distending toxin CdtA                                                                                    |
| HH1447 | 1395895 | 1396713 | 273  | + | <i>cdtB</i> | Cytolethal distending toxin CdtB                                                                                    |
| HH1448 | 1396726 | 1397274 | 183  | + | <i>cdtC</i> | Cytolethal distending toxin CdtC                                                                                    |
| HH1449 | 1397252 | 1397518 | 89   | + |             | Hypothetical protein                                                                                                |
| HH1450 | 1397568 | 1398113 | 182  | + |             | Hypothetical protein                                                                                                |
| HH1451 | 1398440 | 1398868 | 143  | + |             | Conserved hypothetical membrane protein, possible cation efflux pump                                                |
| HH1452 | 1398868 | 1399179 | 104  | + |             | Conserved hypothetical membrane protein, possible cation efflux pump                                                |
| HH1453 | 1399278 | 1399379 | 34   | + |             | Hypothetical protein                                                                                                |
| HH1454 | 1399379 | 1400542 | 388  | + |             | Conserved hypothetical protein, similar to <i>Listeria monocytogenes</i> antibiotic resistance protein LMO0872      |
| HH1455 | 1400616 | 1401536 | 307  | - |             | Hypothetical protein, predicted membrane-associated                                                                 |
| HH1456 | 1401536 | 1402252 | 239  | - |             | Hypothetical protein, predicted membrane-associated                                                                 |
| HH1457 | 1402255 | 1402944 | 230  | - |             | Hypothetical protein, predicted membrane-associated                                                                 |
| HH1458 | 1402950 | 1403522 | 191  | - |             | Hypothetical protein, predicted membrane-associated                                                                 |
| HH1459 | 1403590 | 1403751 | 54   | + |             | Hypothetical protein                                                                                                |
| HH1460 | 1403772 | 1404284 | 171  | + |             | Conserved hypothetical protein, similar to <i>Y. pestis</i> YP1998, predicted secreted protein                      |
| HH1461 | 1404325 | 1405239 | 305  | + |             | Hypothetical protein, predicted secreted protein                                                                    |
| HH1462 | 1405284 | 1406441 | 386  | + |             | Aldo-keto reductase                                                                                                 |
| HH1463 | 1406584 | 1407066 | 161  | - |             | Conserved hypothetical protein, similar to <i>Bacillus halodurans</i> BH0306                                        |
| HH1464 | 1407211 | 1408710 | 500  | + |             | Conserved hypothetical protein, similar to <i>P. aeruginosa</i> PA1316, predicted efflux transporter                |
| HH1465 | 1408875 | 1409480 | 202  | + |             | Hypothetical protein                                                                                                |
| HH1466 | 1409559 | 1409666 | 36   | - |             | Hypothetical protein                                                                                                |
| HH1467 | 1409791 | 1410045 | 85   | + |             | Hypothetical protein, predicted secreted protein                                                                    |
| HH1468 | 1410045 | 1410551 | 169  | + |             | Conserved hypothetical protein, similar to <i>Lactococcus lactis</i> $\gamma$ -carboxymuconolactone decarboxylase   |
| HH1469 | 1410599 | 1411213 | 205  | + |             | Conserved hypothetical protein, possible galactoside acyltransferase                                                |
| HH1470 | 1411334 | 1413262 | 643  | + |             | Hypothetical protein, predicted secreted protein                                                                    |
| HH1471 | 1413597 | 1414472 | 292  | + |             | Aldo-keto reductase                                                                                                 |
| HH1472 | 1414566 | 1415147 | 194  | + | <i>mdaB</i> | Putative modulator of drug activity MdaB                                                                            |
| HH1473 | 1415203 | 1415949 | 249  | + |             | Conserved hypothetical protein, predicted secreted protein                                                          |
| HH1474 | 1415929 | 1416495 | 189  | - |             | Conserved hypothetical protein, similar to <i>Bacteroides vulgaris</i> nitroimidazole antibiotic resistance protein |
| HH1475 | 1416675 | 1417043 | 123  | - |             | Hypothetical protein, predicted membrane-associated                                                                 |
| HH1476 | 1416898 | 1417290 | 131  | - |             | Conserved hypothetical protein, similar to <i>C. jejuni</i> CJ1523c                                                 |
| HH1477 | 1417378 | 1417473 | 32   | + |             | Hypothetical protein                                                                                                |
| HH1478 | 1417559 | 1418593 | 345  | + |             | Conserved hypothetical protein, similar to <i>E. coli</i> HybA hydrogenase                                          |
| HH1479 | 1418593 | 1419264 | 224  | + |             | Conserved hypothetical protein, similar to <i>V. cholerae</i> VC1511, predicted hydrogenase cytochrome B component  |
| HH1480 | 1419518 | 1420180 | 221  | + | <i>glnQ</i> | ABC-type amino-acid transporter, ATP-binding protein                                                                |
| HH1481 | 1420203 | 1420982 | 260  | + |             | Probable ABC-type amino-acid transporter periplasmic solute-binding protein                                         |
| HH1482 | 1420990 | 1421736 | 249  | + |             | Putative ABC-type amino-acid transporter permease protein                                                           |
| HH1483 | 1421750 | 1422406 | 219  | + | <i>gltK</i> | Putative ABC-type amino-acid transporter permease protein                                                           |

|        |         |         |     |   |               |                                                                                                                     |
|--------|---------|---------|-----|---|---------------|---------------------------------------------------------------------------------------------------------------------|
| HH1484 | 1422527 | 1422940 | 138 | - |               | Conserved hypothetical protein, similar to <i>C. jejuni</i> HP1065                                                  |
| HH1485 | 1422940 | 1423158 | 73  | - |               | Hypothetical protein, predicted membrane-associated                                                                 |
| HH1486 | 1423191 | 1423745 | 185 | - | <i>gidB</i>   | Glucose inhibited division protein B                                                                                |
| HH1487 | 1423784 | 1424878 | 365 | - | <i>queA</i>   | S-adenosylmethionine:tRNA-ribosyltransferase-isomerase (queuine synthetase)                                         |
| HH1488 | 1424878 | 1425672 | 265 | - | <i>tatC</i>   | Sec-independent protein secretion pathway component TatC                                                            |
| HH1489 | 1425678 | 1426244 | 189 | - |               | Conserved hypothetical protein, similar to <i>H. pylori</i> Sec-independent translocase protein TatB homolog HP1060 |
| HH1490 | 1426404 | 1427669 | 422 | + | <i>serS</i>   | Seryl-tRNA synthetase                                                                                               |
| HH1491 | 1427685 | 1430165 | 827 | + |               | Conserved hypothetical protein, similar to <i>H. pylori</i> HP1479, predicted membrane-associated                   |
| HH1492 | 1430182 | 1430532 | 117 | - |               | Hypothetical protein                                                                                                |
| HH1493 | 1430783 | 1432063 | 427 | + | <i>gltA</i>   | Citrate synthase                                                                                                    |
| HH1494 | 1432130 | 1432663 | 178 | + | <i>rplY</i>   | Ribosomal protein L25                                                                                               |
| HH1495 | 1432666 | 1433334 | 223 | + | <i>pth</i>    | Peptidyl-tRNA hydrolase                                                                                             |
| HH1496 | 1433340 | 1434416 | 359 | + |               | Conserved hypothetical protein, similar to <i>H. pylori</i> HP1498, predicted membrane-associated                   |
| HH1497 | 1434494 | 1435171 | 226 | + | <i>atpB</i>   | FoF1-type ATP synthase, A subunit                                                                                   |
| HH1498 | 1435161 | 1435757 | 199 | + |               | Conserved hypothetical protein, similar to Aquifex aeolicus thiamine phosphate synthase AQ1366                      |
| HH1499 | 1435732 | 1437816 | 695 | - |               | Conserved hypothetical protein, similar to <i>C. jejuni</i> putative integral membrane protein CJ1055c              |
| HH1500 | 1437912 | 1438778 | 289 | + |               | Conserved hypothetical protein, predicted membrane-associated                                                       |
| HH1501 | 1438904 | 1439224 | 107 | + |               | Conserved hypothetical protein, similar to <i>H. pylori</i> HP0945, predicted secreted protein                      |
| HH1502 | 1439276 | 1440082 | 269 | - |               | Conserved hypothetical protein, similar to Bacillus halodurans BH0857, predicted secreted protein                   |
| HH1503 | 1440054 | 1441856 | 601 | - |               | Conserved hypothetical protein, similar to <i>C. jejuni</i> CJ0522, predicted membrane-associated                   |
| HH1504 | 1441882 | 1442784 | 301 | - |               | Conserved hypothetical protein, similar to <i>C. jejuni</i> CJ0937, predicted integral membrane protein             |
| HH1505 | 1443006 | 1444106 | 367 | + | <i>mpr</i>    | Putative ATP/GTP-binding protein                                                                                    |
| HH1506 | 1444109 | 1445434 | 442 | - |               | Hypothetical protein, predicted secreted protein                                                                    |
| HH1507 | 1445971 | 1447242 | 424 | + | <i>lysA</i>   | Diaminopimelate decarboxylase                                                                                       |
| HH1508 | 1447265 | 1448359 | 365 | + | <i>pheA</i>   | Chorismate mutase/prephenate dehydratase                                                                            |
| HH1509 | 1448391 | 1449275 | 295 | + |               | Conserved hypothetical protein, similar to <i>H. pylori</i> JHP0277                                                 |
| HH1510 | 1449353 | 1450084 | 244 | + |               | Conserved hypothetical protein, similar to Streptomyces globisporus lysozyme M1 precursor                           |
| HH1511 | 1450091 | 1451065 | 325 | + |               | Conserved hypothetical protein                                                                                      |
| HH1512 | 1451159 | 1452388 | 410 | + |               | Hypothetical protein                                                                                                |
| HH1513 | 1452401 | 1453531 | 377 | + |               | Conserved hypothetical protein, similar to Mycobacterium tuberculosis Rv1679, predicted acyl-CoA dehydrogenase      |
| HH1514 | 1453537 | 1454406 | 290 | + |               | Conserved hypothetical protein, similar to Mycobacterium tuberculosis Rv1680                                        |
| HH1515 | 1454409 | 1455563 | 385 | - |               | Conserved hypothetical protein, similar to <i>H. pylori</i> HP0926                                                  |
| HH1516 | 1455569 | 1456600 | 344 | - |               | Conserved hypothetical protein, similar to <i>C. jejuni</i> alanine racemase CJ0905c                                |
| HH1517 | 1456648 | 1456950 | 101 | - |               | Cytochrome c553                                                                                                     |
| HH1518 | 1457049 | 1457633 | 195 | - | <i>recR</i>   | Recombination protein RecR                                                                                          |
| HH1519 | 1457748 | 1458902 | 385 | + | <i>dnaJ_2</i> | Co-chaperone and heat shock protein DnaJ                                                                            |
| HH1520 | 1458898 | 1459326 | 143 | - |               | Hypothetical protein                                                                                                |
| HH1521 | 1459361 | 1459903 | 181 | - |               | Hypothetical protein                                                                                                |
| HH1522 | 1460145 | 1460957 | 271 | - |               | Hypothetical protein, predicted secreted protein                                                                    |
| HH1523 | 1460964 | 1461254 | 97  | - |               | Hypothetical protein, predicted secreted protein                                                                    |
| HH1524 | 1461321 | 1461686 | 122 | - |               | Hypothetical protein, predicted membrane-associated                                                                 |
| HH1525 | 1461761 | 1462057 | 99  | - |               | Hypothetical protein, predicted secreted protein                                                                    |
| HH1526 | 1462176 | 1462880 | 235 | - |               | Hypothetical protein, predicted secreted protein                                                                    |
| HH1527 | 1462901 | 1463215 | 105 | - |               | Hypothetical protein, predicted secreted protein                                                                    |

|        |         |         |      |   |             |                                                                                                                                         |
|--------|---------|---------|------|---|-------------|-----------------------------------------------------------------------------------------------------------------------------------------|
| HH1528 | 1463464 | 1464798 | 445  | - |             | Conserved hypothetical protein                                                                                                          |
| HH1529 | 1464823 | 1467849 | 1009 | - |             | Conserved hypothetical protein, similar to Clostridium acetobutylicum CAC2401, predicted activator of 2-hydroxyglutaryl-CoA dehydratase |
| HH1530 | 1467926 | 1468615 | 230  | - |             | Hypothetical protein, predicted membrane-associated                                                                                     |
| HH1531 | 1468563 | 1469150 | 196  | - | <i>gmhA</i> | Phosphoheptose isomerase                                                                                                                |
| HH1532 | 1469138 | 1470583 | 482  | - |             | Conserved hypothetical protein, similar to <i>C. jejuni</i> putative ADP-heptose synthase                                               |
| HH1533 | 1470610 | 1471614 | 335  | - |             | ADP-L-glycero-D-manno-heptose-6-epimerase                                                                                               |
| HH1534 | 1471628 | 1472158 | 177  | - |             | Conserved hypothetical protein, putative phosphatase                                                                                    |
| HH1535 | 1472395 | 1473138 | 248  | - |             | Conserved hypothetical protein, similar to <i>C. jejuni</i> CJ1493c, predicted membrane-associated                                      |
| HH1536 | 1473148 | 1474074 | 309  | - | <i>prsA</i> | Ribose-phosphate pyrophosphokinase                                                                                                      |
| HH1537 | 1474134 | 1474841 | 236  | - |             | Hypothetical protein                                                                                                                    |
| HH1538 | 1474976 | 1475065 | 30   | + |             | Hypothetical protein                                                                                                                    |
| HH1539 | 1475123 | 1476583 | 487  | + | <i>yphC</i> | GTP-binding protein YphC                                                                                                                |
| HH1540 | 1476604 | 1477761 | 386  | - | <i>metK</i> | S-adenosylmethionine synthetase                                                                                                         |
| HH1541 | 1477980 | 1479986 | 669  | + |             | Conserved hypothetical protein                                                                                                          |
| HH1542 | 1480045 | 1480185 | 47   | + |             | Hypothetical protein, predicted secreted protein                                                                                        |
| HH1543 | 1480257 | 1480844 | 196  | + |             | Conserved hypothetical protein, similar to <i>H. pylori</i> Hop-family proteins                                                         |
| HH1544 | 1480946 | 1481539 | 198  | + | <i>tsaA</i> | Alkyl hydroperoxide reductase TsaA                                                                                                      |
| HH1545 | 1480952 | 1481569 | 206  | - |             | Hypothetical protein, predicted membrane-associated                                                                                     |
| HH1546 | 1481826 | 1482206 | 127  | + |             | Conserved hypothetical protein, similar to <i>P. aeruginosa</i> PA3235, predicted membrane-associated                                   |
| HH1547 | 1482209 | 1483855 | 549  | + | <i>yjcG</i> | Conserved hypothetical protein, putative sodium/solute symporter                                                                        |
| HH1548 | 1483881 | 1485854 | 658  | - | <i>uvrB</i> | Excinuclease ABC, subunit B                                                                                                             |
| HH1549 | 1485924 | 1486142 | 73   | + |             | Conserved hypothetical protein, similar to <i>C. jejuni</i> CJ0681                                                                      |
| HH1550 | 1486145 | 1486408 | 88   | + |             | Conserved hypothetical protein, similar to <i>H. pylori</i> HP0386                                                                      |
| HH1551 | 1486408 | 1488318 | 637  | + | <i>priA</i> | Primosomal protein N'                                                                                                                   |
| HH1552 | 1488377 | 1488814 | 146  | + |             | Conserved hypothetical protein, similar to <i>C. jejuni</i> CJ1460                                                                      |
| HH1553 | 1488866 | 1489453 | 196  | + |             | Conserved hypothetical protein, putative DNA methylase                                                                                  |
| HH1554 | 1489459 | 1490046 | 196  | + | <i>fliL</i> | Flagellar basal body protein FliL                                                                                                       |
| HH1555 | 1490054 | 1490413 | 120  | + | <i>acpS</i> | Putative holo- [acyl-carrier protein] synthase                                                                                          |
| HH1556 | 1490412 | 1490567 | 52   | - |             | Hypothetical protein, predicted secreted protein                                                                                        |
| HH1557 | 1490659 | 1491912 | 418  | - | <i>aroF</i> | Phospho-2-dehydro-3-deoxyheptonate aldolase                                                                                             |
| HH1558 | 1491944 | 1492054 | 37   | - |             | Hypothetical protein                                                                                                                    |
| HH1559 | 1492066 | 1492815 | 250  | - |             | Oxidoreductase                                                                                                                          |
| HH1560 | 1492815 | 1493819 | 335  | - |             | Conserved hypothetical protein, similar to <i>P. aeruginosa</i> PA1116                                                                  |
| HH1561 | 1493785 | 1494357 | 191  | - |             | Hypothetical protein                                                                                                                    |
| HH1562 | 1494383 | 1494481 | 33   | - |             | Hypothetical protein                                                                                                                    |
| HH1563 | 1494555 | 1495316 | 254  | - |             | Conserved hypothetical protein, possible ATP/GTP-binding protein                                                                        |
| HH1564 | 1495300 | 1497573 | 758  | - | <i>clpB</i> | ATP-dependent CLP protease ClpB, ATP-binding subunit                                                                                    |
| HH1565 | 1497589 | 1497849 | 87   | - |             | Conserved hypothetical protein, similar to <i>N. meningitidis</i> NMB0837                                                               |
| HH1566 | 1497851 | 1497943 | 31   | + |             | Hypothetical protein                                                                                                                    |
| HH1567 | 1498064 | 1498618 | 185  | - | <i>oorC</i> | OorC subunit of 2-oxoglutarate:acceptor oxidoreductase                                                                                  |
| HH1568 | 1498623 | 1499447 | 275  | - | <i>oorB</i> | OorB subunit of 2-oxoglutarate:acceptor oxidoreductase                                                                                  |
| HH1569 | 1499452 | 1500573 | 374  | - | <i>oorA</i> | OorA subunit of 2-oxoglutarate:acceptor oxidoreductase                                                                                  |
| HH1570 | 1500586 | 1500894 | 103  | - | <i>oorD</i> | OorD subunit of 2-oxoglutarate:acceptor oxidoreductase                                                                                  |

|        |         |         |     |   |             |                                                                                                                               |
|--------|---------|---------|-----|---|-------------|-------------------------------------------------------------------------------------------------------------------------------|
| HH1571 | 1500942 | 1501886 | 315 | - | <i>mdh</i>  | Malate dehydrogenase                                                                                                          |
| HH1572 | 1502018 | 1502917 | 300 | - | <i>pabC</i> | Conserved hypothetical protein, similar to <i>H. pylori</i> aminodeoxychorismate lyase HP0587                                 |
| HH1573 | 1502880 | 1505834 | 985 | + |             | Hypothetical protein, predicted secreted protein                                                                              |
| HH1574 | 1505888 | 1506160 | 91  | + |             | Conserved hypothetical protein, similar to <i>C. jejuni</i> CJ1397                                                            |
| HH1575 | 1506171 | 1506860 | 230 | + | <i>nth</i>  | Endonuclease III                                                                                                              |
| HH1576 | 1506941 | 1507342 | 134 | + |             | Hypothetical protein                                                                                                          |
| HH1577 | 1507362 | 1507712 | 117 | + | <i>fliN</i> | Flagellar motor switch protein FliN                                                                                           |
| HH1578 | 1507833 | 1508621 | 263 | + |             | Hypothetical protein, predicted membrane-associated                                                                           |
| HH1579 | 1508624 | 1509379 | 252 | + |             | Conserved hypothetical protein, similar to <i>H. pylori</i> HP0582, TonB-like                                                 |
| HH1580 | 1509397 | 1509693 | 99  | - |             | Conserved hypothetical protein                                                                                                |
| HH1581 | 1509710 | 1511080 | 457 | - | <i>thiC</i> | Thiamine biosynthesis protein ThiC                                                                                            |
| HH1582 | 1511265 | 1512431 | 389 | + |             | Conserved hypothetical protein, similar to <i>C. jejuni</i> CJ1607                                                            |
| HH1583 | 1512482 | 1513387 | 302 | + |             | Conserved hypothetical protein, similar to <i>C. jejuni</i> possible two-component response regulator CJ1608                  |
| HH1584 | 1513387 | 1513869 | 161 | + | <i>pgpA</i> | Phosphatidylglycerophosphatase A                                                                                              |
| HH1585 | 1513897 | 1514412 | 172 | - |             | Hypothetical protein, predicted secreted protein                                                                              |
| HH1586 | 1514439 | 1514537 | 33  | - |             | Hypothetical protein                                                                                                          |
| HH1587 | 1514562 | 1515104 | 181 | - |             | Hypothetical protein                                                                                                          |
| HH1588 | 1515152 | 1515961 | 270 | - | <i>thiF</i> | Thiamine biosynthesis protein ThiF                                                                                            |
| HH1589 | 1515964 | 1518330 | 789 | - | <i>pflA</i> | Paralysed flagella protein PflA                                                                                               |
| HH1590 | 1518373 | 1519848 | 492 | - | <i>nuoN</i> | Donor-ubiquinone reductase I, subunit N                                                                                       |
| HH1591 | 1519853 | 1521427 | 525 | - | <i>nuoM</i> | Donor-ubiquinone reductase I, subunit M                                                                                       |
| HH1592 | 1521427 | 1523301 | 625 | - | <i>nuoL</i> | Donor-ubiquinone reductase I, subunit L                                                                                       |
| HH1593 | 1523307 | 1523606 | 100 | - | <i>nuoK</i> | Donor-ubiquinone reductase I, subunit K                                                                                       |
| HH1594 | 1523606 | 1524124 | 173 | - | <i>nuoJ</i> | Donor-ubiquinone reductase I, subunit J                                                                                       |
| HH1595 | 1524120 | 1524755 | 212 | - | <i>nuoI</i> | Donor-ubiquinone reductase I, subunit I                                                                                       |
| HH1596 | 1524767 | 1525762 | 332 | - | <i>nuoH</i> | Donor-ubiquinone reductase I, subunit H                                                                                       |
| HH1597 | 1525762 | 1528233 | 824 | - | <i>nuoG</i> | Donor-ubiquinone reductase I, subunit G                                                                                       |
| HH1598 | 1528233 | 1529042 | 270 | - |             | Conserved hypothetical protein, similar to <i>H. pylori</i> HP1265, predicted donor-ubiquinone reductase I, subunit F homolog |
| HH1599 | 1529042 | 1529269 | 76  | - |             | Conserved hypothetical protein, similar to <i>H. pylori</i> 1264, predicted donor-ubiquinone reductase I, subunit E homolog   |
| HH1600 | 1529282 | 1530508 | 409 | - | <i>nuoD</i> | Donor-ubiquinone reductase I, subunit D                                                                                       |
| HH1601 | 1530508 | 1531248 | 247 | - | <i>nuoC</i> | Donor-ubiquinone reductase I, subunit C                                                                                       |
| HH1602 | 1531265 | 1531771 | 169 | - | <i>nuoB</i> | Donor-ubiquinone reductase I, subunit B                                                                                       |
| HH1603 | 1531756 | 1532157 | 134 | - | <i>nuoA</i> | Donor-ubiquinone reductase I, subunit A                                                                                       |
| HH1604 | 1532288 | 1532875 | 196 | - | <i>yebC</i> | Conserved hypothetical protein, similar to <i>H. pylori</i> HP0162                                                            |
| HH1605 | 1532989 | 1533090 | 34  | + |             | Hypothetical protein                                                                                                          |
| HH1606 | 1533125 | 1534099 | 325 | - | <i>hemB</i> | Delta-aminolevulinic acid dehydratase                                                                                         |
| HH1607 | 1534113 | 1535369 | 31  | - |             | Two-component system histidine kinase                                                                                         |
| HH1608 | 1535387 | 1536049 | 221 | - |             | Two-component system response regulator, BaeR-like                                                                            |
| HH1609 | 1536243 | 1536356 | 38  | + |             | Hypothetical protein                                                                                                          |
| HH1610 | 1536477 | 1536833 | 119 | - |             | Hypothetical protein                                                                                                          |
| HH1611 | 1536806 | 1537066 | 87  | - |             | Conserved hypothetical protein, similar to <i>C. jejuni</i> CJ0787                                                            |
| HH1612 | 1537146 | 1537946 | 267 | - |             | Conserved hypothetical protein, similar to <i>H. pylori</i> HP1182                                                            |

|        |         |         |     |   |               |                                                                                                                 |
|--------|---------|---------|-----|---|---------------|-----------------------------------------------------------------------------------------------------------------|
| HH1613 | 1537939 | 1538244 | 102 | - |               | Hypothetical protein, predicted membrane-associated                                                             |
| HH1614 | 1538251 | 1539579 | 443 | - |               | Conserved hypothetical protein, similar to <i>H. pylori</i> HP1181, predicted efflux transporter                |
| HH1615 | 1539599 | 1540129 | 177 | - | <i>ppiA</i>   | Peptidyl-prolyl cis-trans isomerase (rotamase)                                                                  |
| HH1616 | 1540369 | 1541262 | 298 | + |               | Conserved hypothetical protein, similar to <i>H. pylori</i> HP1440                                              |
| HH1617 | 1541280 | 1541369 | 30  | - |               | Hypothetical protein                                                                                            |
| HH1618 | 1541379 | 1542761 | 461 | + |               | Protease                                                                                                        |
| HH1619 | 1542780 | 1543487 | 236 | + | <i>purC</i>   | SAICAR synthetase PurC                                                                                          |
| HH1620 | 1543500 | 1543739 | 80  | + | <i>purS</i>   | Conserved hypothetical protein, predicted PurS-like protein                                                     |
| HH1621 | 1543739 | 1544404 | 222 | + | <i>purQ</i>   | FGAM synthetase [glutamine amidotransferase domain] PurQ                                                        |
| HH1622 | 1544420 | 1545511 | 364 | + |               | Conserved hypothetical protein, similar to <i>H. pylori</i> JHP1268, predicted membrane-associated              |
| HH1623 | 1545498 | 1546223 | 242 | + | <i>plsC</i>   | 1-acyl-glycerol-3-phosphate acyltransferase PlsC                                                                |
| HH1624 | 1546443 | 1547846 | 468 | + | <i>pyrD</i>   | Dihydroorotate dehydrogenase                                                                                    |
| HH1625 | 1547880 | 1549175 | 432 | + |               | Putative zinc protease                                                                                          |
| HH1626 | 1549181 | 1550059 | 293 | + | <i>dapA</i>   | Dihydrodipicolinate synthetase                                                                                  |
| HH1627 | 1550059 | 1550859 | 267 | + |               | Conserved hypothetical protein, possible oxidoreductase                                                         |
| HH1628 | 1551027 | 1552226 | 400 | + |               | Conserved hypothetical protein, possible apolipoprotein N-acyltransferase                                       |
| HH1629 | 1552335 | 1553093 | 253 | + |               | Hypothetical protein, predicted secreted protein                                                                |
| HH1630 | 1553201 | 1554862 | 554 | + |               | Conserved hypothetical protein, similar to <i>C. jejuni</i> CJ1679                                              |
| HH1631 | 1554894 | 1556297 | 468 | - | <i>dagA</i>   | Predicted amino-acid transport protein                                                                          |
| HH1632 | 1556475 | 1557098 | 208 | - |               | Conserved hypothetical protein, similar to <i>E. coli</i> YeaS, predicted membrane-associated                   |
| HH1633 | 1557237 | 1559708 | 824 | + | <i>gyrA</i>   | DNA gyrase, subunit A                                                                                           |
| HH1634 | 1559752 | 1560222 | 157 | + |               | Hypothetical protein, predicted secreted protein                                                                |
| HH1635 | 1560222 | 1561529 | 436 | + | <i>flgR</i>   | Transcriptional activator FlgR (NtrC family)                                                                    |
| HH1636 | 1561553 | 1562071 | 173 | + |               | Hypothetical protein, predicted secreted protein                                                                |
| HH1637 | 1562124 | 1562984 | 287 | - |               | Conserved hypothetical protein, similar to <i>V. cholerae</i> VC0271, predicted membrane-associated             |
| HH1638 | 1563172 | 1564134 | 321 | - |               | Conserved hypothetical protein, similar to <i>V. cholerae</i> VC0271, predicted membrane-associated             |
| HH1639 | 1564265 | 1565158 | 298 | - |               | Hypothetical protein, predicted secreted protein                                                                |
| HH1640 | 1565154 | 1566386 | 411 | - |               | Conserved hypothetical protein, similar to <i>H. pylori</i> HP1026                                              |
| HH1641 | 1566383 | 1566757 | 125 | - | <i>hspR</i>   | Putative heat shock transcriptional regulator                                                                   |
| HH1642 | 1566786 | 1567676 | 297 | - | <i>cbpA</i>   | Curved DNA-binding protein CbpA                                                                                 |
| HH1643 | 1567835 | 1570747 | 971 | + |               | Putative helicase                                                                                               |
| HH1644 | 1571029 | 1572408 | 460 | + |               | Conserved hypothetical protein, similar to <i>H. pylori</i> NA(+)/H(+) antiporter 1 jhp1447                     |
| HH1645 | 1572432 | 1573763 | 444 | + | <i>nhaA</i>   | Na <sup>+</sup> /H <sup>+</sup> antiporter                                                                      |
| HH1646 | 1573817 | 1574107 | 97  | + |               | Conserved hypothetical protein, similar to <i>H. pylori</i> JHP1448, predicted membrane-associated              |
| HH1647 | 1574117 | 1575952 | 612 | + | <i>secD</i>   | Preprotein translocase subunits SecD                                                                            |
| HH1648 | 1575959 | 1576927 | 323 | + | <i>secF</i>   | Preprotein translocase subunits SecF                                                                            |
| HH1649 | 1576941 | 1577279 | 113 | + |               | Conserved hypothetical protein, similar to <i>H. pylori</i> conserved hypothetical integral membrane protein    |
| HH1650 | 1577318 | 1578028 | 237 | + |               | Hypothetical protein                                                                                            |
| HH1651 | 1578043 | 1580130 | 696 | + |               | Hypothetical protein, predicted secreted protein                                                                |
| HH1652 | 1580140 | 1580598 | 153 | - |               | Conserved hypothetical protein, similar to <i>C. jejuni</i> putative hydrolase                                  |
| HH1653 | 1580835 | 1582358 | 508 | + | <i>flaA_2</i> | Major flagellin subunit FlaA_2                                                                                  |
| HH1654 | 1582612 | 1583277 | 222 | + |               | Conserved hypothetical protein, similar to <i>E. coli</i> YfcA, predicted membrane-associated                   |
| HH1655 | 1583353 | 1583766 | 138 | + |               | Conserved hypothetical protein, similar to <i>H. pylori</i> HP0721, predicted secreted protein                  |
| HH1656 | 1583821 | 1584489 | 223 | + |               | Conserved hypothetical protein, similar to <i>C. jejuni</i> chemotaxis two-component response regulator CJ1223c |

|        |         |         |      |   |              |                                                                                                                                                |
|--------|---------|---------|------|---|--------------|------------------------------------------------------------------------------------------------------------------------------------------------|
| HH1657 | 1584505 | 1585785 | 427  | + |              | Conserved hypothetical protein, similar to <i>C. jejuni</i> chemotaxis two-component histidine kinase CJ1222c                                  |
| HH1658 | 1585869 | 1587329 | 487  | + | <i>dnaB</i>  | Replicative DNA helicase                                                                                                                       |
| HH1659 | 1587342 | 1588676 | 445  | + |              | Conserved hypothetical protein, similar to <i>H. pylori</i> competence protein ComE3                                                           |
| HH1660 | 1588655 | 1589941 | 429  | - |              | Conserved hypothetical protein, possible UDP-glucose 6-dehydrogenase                                                                           |
| HH1661 | 1589944 | 1590522 | 193  | - |              | Conserved hypothetical protein, possible acyltransferase                                                                                       |
| HH1662 | 1590522 | 1591481 | 320  | - | <i>wbpB</i>  | Lipopolysaccharide biosynthesis protein wbpB                                                                                                   |
| HH1663 | 1591492 | 1592415 | 308  | - |              | Conserved hypothetical protein, similar to <i>C. jejuni</i> CJ0404, predicted transmembrane protein                                            |
| HH1664 | 1592463 | 1593005 | 181  | - |              | Conserved hypothetical protein, similar to <i>H. pylori</i> HP0184                                                                             |
| HH1665 | 1593020 | 1594267 | 416  | - | <i>glyA</i>  | Glycine hydroxymethyltransferase                                                                                                               |
| HH1666 | 1594270 | 1595823 | 518  | - | <i>lysS</i>  | Lysyl-tRNA synthetases                                                                                                                         |
| HH1667 | 1595839 | 1596459 | 207  | - |              | Conserved hypothetical protein, similar to <i>H. pylori</i> HP0181, predicted membrane-associated                                              |
| HH1668 | 1596645 | 1597538 | 298  | + | <i>ubiA</i>  | 4-hydroxybenzoate octaprenyltransferase                                                                                                        |
| HH1669 | 1597531 | 1598094 | 188  | + |              | Hypothetical protein                                                                                                                           |
| HH1670 | 1598101 | 1598625 | 175  | + |              | Conserved hypothetical protein, similar to <i>H. pylori</i> HP1358, predicted membrane-associated                                              |
| HH1671 | 1598650 | 1599834 | 395  | + |              | Conserved hypothetical protein, possible aspartate aminotransferase                                                                            |
| HH1672 | 1599841 | 1601130 | 430  | + |              | Conserved hypothetical protein, similar to <i>H. pylori</i> HP0580, predicted membrane-associated                                              |
| HH1673 | 1601130 | 1601801 | 224  | + |              | Hypothetical protein, predicted membrane-associated                                                                                            |
| HH1674 | 1601878 | 1603845 | 656  | + |              | Conserved hypothetical protein, similar to <i>H. pylori</i> HP0578, predicted membrane-associated                                              |
| HH1675 | 1603852 | 1604616 | 255  | + |              | Hypothetical protein                                                                                                                           |
| HH1676 | 1604639 | 1604770 | 44   | + |              | Conserved hypothetical protein, similar to <i>H. pylori</i> Hop-family proteins, may become fused with HH1677 due to slipped strand mispairing |
| HH1677 | 1604823 | 1605449 | 209  | + | <i>omp30</i> | Conserved hypothetical protein, similar to <i>H. pylori</i> Hop-family proteins, may become fused with HH1676 due to slipped strand mispairing |
| HH1678 | 1605557 | 1606231 | 225  | - |              | Conserved hypothetical protein, similar to <i>C. jejuni</i> CJ0186c, predicted membrane-associated                                             |
| HH1679 | 1606270 | 1607235 | 322  | - | <i>corA</i>  | Mg and Co transporter                                                                                                                          |
| HH1680 | 1607380 | 1607922 | 181  | + | <i>pgsA</i>  | Phosphatidylglycerophosphate synthase                                                                                                          |
| HH1681 | 1607922 | 1608974 | 351  | + |              | Conserved hypothetical protein, similar to <i>C. jejuni</i> CJ1068, predicted metallopeptidase                                                 |
| HH1682 | 1608987 | 1609652 | 222  | + |              | Conserved hypothetical protein, similar to <i>H. pylori</i> HP0395                                                                             |
| HH1683 | 1609652 | 1610035 | 128  | + |              | Hypothetical protein, predicted secreted protein                                                                                               |
| HH1684 | 1610064 | 1611371 | 436  | + |              | Hypothetical protein                                                                                                                           |
| HH1685 | 1611384 | 1612115 | 244  | + |              | Conserved hypothetical protein, similar to <i>C. jejuni</i> CJ0984                                                                             |
| HH1686 | 1612194 | 1613990 | 599  | + | <i>pycB</i>  | Oxaloacetate decarboxylase, $\alpha$ chain                                                                                                     |
| HH1687 | 1613968 | 1615161 | 398  | + | <i>nifS</i>  | NifS family aminotransferase                                                                                                                   |
| HH1688 | 1615164 | 1618514 | 1117 | - | <i>carB</i>  | Carbamoylphosphate synthase, large subunit                                                                                                     |
| HH1689 | 1618719 | 1618892 | 58   | + |              | Hypothetical protein, predicted membrane-associated                                                                                            |
| HH1690 | 1618909 | 1619121 | 71   | - |              | Hypothetical protein, predicted membrane-associated                                                                                            |
| HH1691 | 1619133 | 1619984 | 284  | - | <i>purU</i>  | Formyltetrahydrofolate deformylase PurU                                                                                                        |
| HH1692 | 1619984 | 1620865 | 294  | - |              | Conserved hypothetical protein, similar to <i>H. pylori</i> HP1435, predicted protease                                                         |
| HH1693 | 1620891 | 1621268 | 126  | - |              | Conserved hypothetical protein, similar to <i>C. jejuni</i> CJ1388                                                                             |
| HH1694 | 1621338 | 1621802 | 155  | + |              | Hypothetical protein, predicted secreted protein                                                                                               |
| HH1695 | 1621909 | 1624473 | 855  | + | <i>flgL</i>  | Flagellar hook-associated protein FlgL                                                                                                         |
| HH1696 | 1624473 | 1625228 | 252  | + |              | Hypothetical protein                                                                                                                           |
| HH1697 | 1625279 | 1625956 | 226  | + |              | Conserved hypothetical protein, similar to <i>C. jejuni</i> chemotaxis two-component response regulator CJ0355c                                |
| HH1698 | 1626048 | 1626146 | 33   | - |              | Hypothetical protein                                                                                                                           |

|        |         |         |     |   |             |                                                                                                                  |
|--------|---------|---------|-----|---|-------------|------------------------------------------------------------------------------------------------------------------|
| HH1699 | 1626294 | 1626953 | 220 | + | <i>speE</i> | Spermidine synthase                                                                                              |
| HH1700 | 1626959 | 1627579 | 207 | + |             | Putative ATP/GTP-binding protein                                                                                 |
| HH1701 | 1627596 | 1628387 | 264 | + | <i>dapF</i> | Diaminopimelate epimerase                                                                                        |
| HH1702 | 1628402 | 1628650 | 83  | - |             | Conserved hypothetical protein, similar to <i>C. jejuni</i> CJ0667                                               |
| HH1703 | 1628653 | 1629099 | 149 | - |             | Conserved hypothetical protein, similar to <i>H. pylori</i> JHP0852                                              |
| HH1704 | 1629286 | 1631439 | 718 | + | <i>flgE</i> | Flagellar hook protein FlgE, similar to <i>H. pylori</i> HP0870 (FlgE1)                                          |
| HH1705 | 1631612 | 1632535 | 308 | + |             | Conserved hypothetical protein, similar to <i>C. jejuni</i> possible periplasmic protein                         |
| HH1706 | 1632564 | 1633073 | 170 | - |             | Conserved hypothetical protein, similar to <i>H. pylori</i> JHP0273, predicted membrane-associated               |
| HH1707 | 1633186 | 1634337 | 384 | + |             | Conserved hypothetical protein, similar to <i>E. coli</i> ECS4630                                                |
| HH1708 | 1634237 | 1635640 | 468 | + | <i>pcnB</i> | Poly(A) polymerase                                                                                               |
| HH1709 | 1635673 | 1637574 | 634 | - |             | Conserved hypothetical protein, similar to <i>C. jejuni</i> CiaB protein                                         |
| HH1710 | 1637582 | 1637671 | 30  | + |             | Hypothetical protein                                                                                             |
| HH1711 | 1637704 | 1638630 | 309 | + | <i>htpX</i> | Heat shock protein HtpX                                                                                          |
| HH1712 | 1638709 | 1639326 | 206 | + | <i>foiE</i> | GTP cyclohydrolase I                                                                                             |
| HH1713 | 1639445 | 1640569 | 375 | + |             | Conserved hypothetical protein, similar to <i>H. pylori</i> Hop-family proteins                                  |
| HH1714 | 1640750 | 1641535 | 262 | - |             | Conserved hypothetical protein, similar to <i>Deinococcus radiodurans</i> putative histidinol phosphatase DR0470 |
| HH1715 | 1641680 | 1642090 | 137 | + |             | Hypothetical protein                                                                                             |
| HH1716 | 1642090 | 1642710 | 207 | + |             | Conserved hypothetical protein, similar to <i>H. pylori</i> HP1485                                               |
| HH1717 | 1642731 | 1643168 | 146 | + |             | Conserved hypothetical protein, similar to <i>H. pylori</i> HP1484, predicted membrane-associated                |
| HH1718 | 1643182 | 1644597 | 472 | + | <i>argH</i> | Argininosuccinate lyase                                                                                          |
| HH1719 | 1644593 | 1645321 | 243 | + | <i>ubiE</i> | Ubiquinone/menaquinone biosynthesis methyltransferase                                                            |
| HH1720 | 1645523 | 1647004 | 494 | + |             | Conserved hypothetical protein, possible malate:quinone oxidoreductase                                           |
| HH1721 | 1647128 | 1648435 | 436 | + | <i>hisD</i> | Histidinol dehydrogenase                                                                                         |
| HH1722 | 1648442 | 1648702 | 87  | + |             | Conserved hypothetical protein, similar to <i>C. jejuni</i> CJ0539                                               |
| HH1723 | 1648698 | 1649171 | 158 | + |             | Conserved hypothetical protein, similar to <i>H. pylori</i> HP0242                                               |
| HH1724 | 1649171 | 1650079 | 303 | + |             | Conserved hypothetical protein, possible geranyl transferase                                                     |
| HH1725 | 1650093 | 1651412 | 440 | + | <i>hemA</i> | Glutamyl-tRNA reductase                                                                                          |
| HH1726 | 1651425 | 1653188 | 588 | + | <i>proS</i> | Prolyl-tRNA synthetase                                                                                           |
| HH1727 | 1653201 | 1654163 | 321 | + | <i>hemC</i> | Porphobilinogen deaminase                                                                                        |
| HH1728 | 1654309 | 1654410 | 34  | - |             | Hypothetical protein                                                                                             |
| HH1729 | 1654478 | 1654915 | 146 | + |             | Conserved hypothetical protein, similar to <i>H. pylori</i> Hop-family proteins                                  |
| HH1730 | 1654974 | 1655858 | 295 | - | <i>rbn</i>  | TRNA-processing ribonuclease BN                                                                                  |
| HH1731 | 1655873 | 1656721 | 283 | - | <i>bioB</i> | Biotin synthetase                                                                                                |
| HH1732 | 1656817 | 1658067 | 417 | + | <i>xseA</i> | Exonuclease VII, large subunit                                                                                   |
| HH1733 | 1658087 | 1658776 | 230 | - |             | Hypothetical protein                                                                                             |
| HH1734 | 1658855 | 1659745 | 297 | - | <i>selD</i> | Selenophosphate synthase                                                                                         |
| HH1735 | 1659762 | 1659866 | 35  | + |             | Hypothetical protein                                                                                             |
| HH1736 | 1659911 | 1660522 | 204 | - |             | Conserved hypothetical protein, similar to <i>C. jejuni</i> CJ1505c                                              |
| HH1737 | 1660708 | 1663284 | 859 | - | <i>acnB</i> | Aconitate hydratase                                                                                              |
| HH1738 | 1663392 | 1663625 | 78  | + |             | Hypothetical protein, predicted membrane-associated                                                              |
| HH1739 | 1663628 | 1665052 | 475 | + | <i>nifS</i> | Conserved hypothetical protein, similar to <i>H. pylori</i> HP0405, predicted NifS-like protein                  |
| HH1740 | 1665138 | 1666991 | 618 | - | <i>htpG</i> | Heat shock protein HtpG                                                                                          |
| HH1741 | 1667185 | 1668096 | 304 | + |             | Conserved hypothetical protein, similar to <i>C. jejuni</i> CJ1618c                                              |
| HH1742 | 1668186 | 1669322 | 379 | + |             | Hypothetical protein, predicted secreted protein                                                                 |



|        |         |         |     |   |               |                                                                                                                                            |
|--------|---------|---------|-----|---|---------------|--------------------------------------------------------------------------------------------------------------------------------------------|
| HH1743 | 1669344 | 1670600 | 419 | + |               | Hypothetical protein, predicted secreted protein                                                                                           |
| HH1744 | 1670759 | 1670962 | 68  | + | <i>rpmE</i>   | Ribosomal protein L31                                                                                                                      |
| HH1745 | 1670970 | 1671827 | 286 | + |               | Conserved hypothetical protein                                                                                                             |
| HH1746 | 1671835 | 1672521 | 229 | + |               | Conserved hypothetical protein, possible rRNA methylase                                                                                    |
| HH1747 | 1672511 | 1673665 | 385 | + |               | Hypothetical protein, predicted membrane-associated                                                                                        |
| HH1748 | 1673662 | 1674468 | 269 | + |               | Conserved hypothetical protein, similar to <i>H. pylori</i> HP0555, predicted secreted protein                                             |
| HH1749 | 1674507 | 1675712 | 402 | + |               | Conserved hypothetical protein, possible aminotransferase                                                                                  |
| HH1750 | 1675725 | 1677017 | 431 | + | <i>hom</i>    | Homoserine dehydrogenase                                                                                                                   |
| HH1751 | 1677044 | 1677373 | 110 | + |               | Conserved hypothetical protein, similar to <i>H. pylori</i> HP0823                                                                         |
| HH1752 | 1677388 | 1677771 | 128 | - |               | Hypothetical protein                                                                                                                       |
| HH1753 | 1677764 | 1678234 | 157 | - |               | Hypothetical protein                                                                                                                       |
| HH1754 | 1678266 | 1678355 | 30  | + |               | Hypothetical protein                                                                                                                       |
| HH1755 | 1678358 | 1678816 | 153 | - |               | Hypothetical protein, predicted secreted protein                                                                                           |
| HH1756 | 1678836 | 1681379 | 848 | - |               | Putative serine/threonine protein phosphatase                                                                                              |
| HH1757 | 1681418 | 1681606 | 63  | - |               | Conserved hypothetical protein, similar to <i>H. pylori</i> HP0085, predicted secreted protein                                             |
| HH1758 | 1681606 | 1682415 | 270 | - |               | Conserved hypothetical protein, similar to <i>C. jejuni</i> CJ0141c, possible ABC transporter                                              |
| HH1759 | 1682411 | 1683139 | 243 | - | <i>fecE</i>   | ABC transporter, ATP-binding protein                                                                                                       |
| HH1760 | 1683146 | 1684012 | 289 | - |               | Conserved hypothetical protein, similar to <i>C. jejuni</i> CJ0143c, predicted periplasmic solute binding protein for ABC transport system |
| HH1761 | 1684012 | 1685379 | 456 | - |               | Conserved hypothetical protein, similar to <i>H. pylori</i> HP0087, predicted secreted protein                                             |
| HH1762 | 1685383 | 1685763 | 127 | - |               | Conserved hypothetical protein, similar to <i>C. jejuni</i> CJ0717                                                                         |
| HH1763 | 1685778 | 1686275 | 166 | - |               | Putative phosphotyrosine protein phosphatase                                                                                               |
| HH1764 | 1686275 | 1687546 | 424 | - |               | Conserved hypothetical protein, similar to <i>C. jejuni</i> CJ0067, predicted hydrolase                                                    |
| HH1765 | 1687549 | 1688370 | 274 | - |               | Conserved hypothetical protein, similar to <i>H. pylori</i> HP0983, predicted membrane-associated                                          |
| HH1766 | 1688373 | 1689650 | 426 | - | <i>pyrC_1</i> | Dihydroorotase                                                                                                                             |
| HH1767 | 1689655 | 1690392 | 246 | - | <i>ccdA</i>   | Cytochrome c biogenesis protein CcdA                                                                                                       |
| HH1768 | 1690505 | 1692094 | 530 | + | <i>deaD</i>   | ATP-dependent RNA helicase DeaD                                                                                                            |
| HH1769 | 1692110 | 1692688 | 193 | + |               | Hypothetical protein                                                                                                                       |
| HH1770 | 1692713 | 1693534 | 274 | - |               | Conserved hypothetical protein, similar to <i>H. pylori</i> JHP0739, predicted membrane-associated                                         |
| HH1771 | 1693612 | 1694181 | 190 | + | <i>adk</i>    | Adenylate kinase                                                                                                                           |
| HH1772 | 1694417 | 1696093 | 559 | + | <i>yihK</i>   | GTP-binding protein                                                                                                                        |
| HH1773 | 1696168 | 1696788 | 207 | + | <i>frxA</i>   | Conserved hypothetical protein, similar to <i>H. pylori</i> HP0642 (FrxA), predicted nitroreductase                                        |
| HH1774 | 1696801 | 1699173 | 791 | + | <i>nrdA</i>   | Ribonucleoside diphosphate reductase, $\alpha$ subunit                                                                                     |
| HH1775 | 1699244 | 1699594 | 117 | + |               | Hypothetical protein, predicted membrane-associated                                                                                        |
| HH1776 | 1699540 | 1700616 | 359 | - |               | $\alpha$ -1,3-fucosyltransferase                                                                                                           |
| HH1777 | 1700616 | 1701680 | 355 | - | <i>prfA</i>   | Peptide chain release factor 1                                                                                                             |
| HH1778 | 1701709 | 1702023 | 105 | - | <i>rpsT</i>   | Ribosomal protein S20                                                                                                                      |
| HH1779 | 1702066 | 1703424 | 453 | + | <i>glmM</i>   | Phosglucosamine mutase                                                                                                                     |
| HH1780 | 1703450 | 1703947 | 166 | + | <i>lspA</i>   | Lipoprotein signal peptidase                                                                                                               |
| HH1781 | 1704224 | 1705063 | 280 | + |               | Hypothetical protein, predicted secreted protein                                                                                           |
| HH1782 | 1705076 | 1705945 | 290 | + |               | Hypothetical protein, predicted secreted protein                                                                                           |
| HH1783 | 1706005 | 1706238 | 78  | + |               | Conserved hypothetical protein, similar to <i>C. jejuni</i> CJ0916c                                                                        |
| HH1784 | 1706321 | 1707370 | 350 | + | <i>oppB</i>   | Oligopeptide ABC transporter, permease protein OppB                                                                                        |
| HH1785 | 1707366 | 1708430 | 355 | + | <i>oppC</i>   | Oligopeptide ABC transporter, permease protein OppC                                                                                        |

|        |         |         |     |   |               |                                                                                                                                    |
|--------|---------|---------|-----|---|---------------|------------------------------------------------------------------------------------------------------------------------------------|
| HH1786 | 1708549 | 1710000 | 484 | + | <i>oppD</i>   | Oligopeptide ABC transporter, ATP-binding protein OppD                                                                             |
| HH1787 | 1709942 | 1710652 | 237 | + | <i>magIII</i> | 3-methyladenine DNA glycosylase                                                                                                    |
| HH1788 | 1710683 | 1711120 | 146 | + |               | Hypothetical protein                                                                                                               |
| HH1789 | 1711202 | 1711330 | 43  | + |               | Hypothetical protein, predicted membrane-associated                                                                                |
| HH1790 | 1711412 | 1711687 | 92  | + |               | Hypothetical protein, predicted secreted protein                                                                                   |
| HH1791 | 1711838 | 1712497 | 220 | + |               | Hypothetical protein                                                                                                               |
| HH1792 | 1712563 | 1713405 | 281 | + | <i>ttdA</i>   | Fumarate hydratase, $\alpha$ subunit                                                                                               |
| HH1793 | 1713419 | 1713973 | 185 | + | <i>ttdB</i>   | Fumarate hydratase, $\beta$ subunit                                                                                                |
| HH1794 | 1714136 | 1714435 | 100 | + |               | Hypothetical protein                                                                                                               |
| HH1795 | 1715103 | 1717001 | 633 | - |               | Conserved hypothetical protein, similar to <i>C. jejuni</i> CJ1337, predicted secreted protein                                     |
| HH1796 | 1717036 | 1718577 | 514 | - | <i>flaB</i>   | Minor flagellin subunit FlaB                                                                                                       |
| HH1797 | 1718606 | 1718710 | 35  | - |               | Hypothetical protein                                                                                                               |
| HH1798 | 1718740 | 1720986 | 749 | + | <i>topA</i>   | DNA topoisomerase I                                                                                                                |
| HH1799 | 1721226 | 1721774 | 183 | + |               | Conserved hypothetical protein, similar to <i>H. pylori</i> Hop-family proteins                                                    |
| HH1800 | 1721955 | 1722263 | 103 | - |               | Conserved hypothetical protein, similar to <i>Thermotoga maritima</i> TM0763                                                       |
| HH1801 | 1722276 | 1724018 | 581 | - | <i>aspS</i>   | Aspartyl-tRNA synthetase                                                                                                           |
| HH1802 | 1724070 | 1725035 | 322 | - | <i>cheV_2</i> | Chemotaxis signal transduction protein CheV, similar to <i>H. pylori</i> HP0616 (CheV2)                                            |
| HH1803 | 1725150 | 1727099 | 650 | + | <i>lig</i>    | DNA ligase                                                                                                                         |
| HH1804 | 1727112 | 1727717 | 202 | - |               | Conserved hypothetical protein, similar to <i>H. pylori</i> HP1029                                                                 |
| HH1805 | 1727738 | 1728913 | 392 | - | <i>dapE</i>   | Succinyl-diaminopimelate desuccinylase                                                                                             |
| HH1806 | 1728918 | 1729301 | 128 | - |               | Hypothetical protein                                                                                                               |
| HH1807 | 1729297 | 1729920 | 208 | - |               | Conserved hypothetical protein, similar to <i>P. aeruginosa</i> PA1644                                                             |
| HH1808 | 1729920 | 1731149 | 410 | - |               | ADP-heptose:LPS heptosyltransferase                                                                                                |
| HH1809 | 1731325 | 1732650 | 442 | + | <i>hisS</i>   | Histidyl-tRNA synthetase                                                                                                           |
| HH1810 | 1732655 | 1734508 | 618 | + | <i>pepF</i>   | Oligoendopeptidase PepF                                                                                                            |
| HH1811 | 1734480 | 1734968 | 163 | + |               | Conserved hypothetical protein, similar to <i>C. jejuni</i> CJ1100                                                                 |
| HH1812 | 1735054 | 1735719 | 222 | + |               | Conserved hypothetical protein, similar to <i>H. pylori</i> JHP0420                                                                |
| HH1813 | 1735740 | 1736552 | 271 | + |               | Conserved hypothetical protein, similar to <i>H. pylori</i> JHP0420                                                                |
| HH1814 | 1736556 | 1736861 | 102 | + |               | Conserved hypothetical protein, similar to <i>H. pylori</i> HP0467, predicted membrane-associated                                  |
| HH1815 | 1736919 | 1737803 | 295 | + |               | Conserved hypothetical protein, similar to <i>H. pylori</i> HP0466                                                                 |
| HH1816 | 1737851 | 1738345 | 165 | + |               | Hypothetical protein                                                                                                               |
| HH1817 | 1738359 | 1738775 | 139 | - |               | Conserved hypothetical protein, similar to <i>C. jejuni</i> CJ0436                                                                 |
| HH1818 | 1738787 | 1739281 | 165 | - | <i>tpx</i>    | Thiol peroxidase                                                                                                                   |
| HH1819 | 1739349 | 1740779 | 477 | + | <i>phoH</i>   | Conserved hypothetical protein, putative phosphate starvation-inducible protein PhoH                                               |
| HH1820 | 1740779 | 1741486 | 236 | + |               | Hypothetical protein, predicted membrane-associated                                                                                |
| HH1821 | 1741519 | 1742235 | 239 | + |               | Conserved hypothetical protein, predicted lipoprotein                                                                              |
| HH1822 | 1742338 | 1742658 | 107 | + |               | Conserved hypothetical protein, similar to <i>C. jejuni</i> CJ1429c, may become fused with HH1823 due to slipped strand mispairing |
| HH1823 | 1742726 | 1743277 | 184 | + |               | Conserved hypothetical protein, similar to <i>C. jejuni</i> CJ1429c, may become fused with HH1822 due to slipped strand mispairing |
| HH1824 | 1743354 | 1745780 | 809 | - | <i>ppsA</i>   | Phosphoenolpyruvate synthase                                                                                                       |
| HH1825 | 1745942 | 1748176 | 745 | + | <i>purL</i>   | FGAM synthase [synthetase domain] PurL                                                                                             |
| HH1826 | 1748192 | 1748737 | 182 | + |               | Conserved hypothetical protein, predicted secreted protein                                                                         |
| HH1827 | 1748801 | 1750264 | 488 | - |               | Conserved hypothetical protein, similar to <i>H. pylori</i> HP0235                                                                 |

|        |         |         |     |   |             |                                                                                                                                              |
|--------|---------|---------|-----|---|-------------|----------------------------------------------------------------------------------------------------------------------------------------------|
| HH1828 | 1750331 | 1750972 | 214 | - | <i>thiE</i> | Thiamine monophosphate synthase                                                                                                              |
| HH1829 | 1750982 | 1751704 | 241 | - |             | Arginyl tRNA transferase                                                                                                                     |
| HH1830 | 1751704 | 1752927 | 408 | - | <i>mltC</i> | Membrane-bound lytic murein transglycosylase C (MltC)                                                                                        |
| HH1831 | 1753076 | 1754005 | 310 | + |             | Conserved hypothetical protein, similar to <i>H. pylori</i> HP0117                                                                           |
| HH1832 | 1754121 | 1754753 | 211 | + | <i>sodF</i> | Superoxide dismutase                                                                                                                         |
| HH1833 | 1754869 | 1755696 | 276 | + | <i>nadC</i> | Nicotinate-nucleotide pyrophosphorylase                                                                                                      |
| HH1834 | 1755703 | 1756701 | 333 | + | <i>thiL</i> | Thiamine monophosphate kinase                                                                                                                |
| HH1835 | 1756714 | 1757427 | 238 | + |             | Conserved hypothetical protein, similar to <i>C. jejuni</i> CJ1374c                                                                          |
| HH1836 | 1757518 | 1759317 | 600 | + |             | Hypothetical protein, predicted membrane-associated                                                                                          |
| HH1837 | 1759343 | 1759912 | 190 | + |             | Hypothetical protein, predicted membrane-associated                                                                                          |
| HH1838 | 1759912 | 1760694 | 261 | + | <i>psd</i>  | Phosphatidylserine decarboxylase                                                                                                             |
| HH1839 | 1760723 | 1761733 | 337 | + | <i>nadA</i> | Quinolinate synthase                                                                                                                         |
| HH1840 | 1761899 | 1762393 | 165 | + |             | Hypothetical protein, predicted membrane-associated                                                                                          |
| HH1841 | 1762366 | 1762695 | 110 | + |             | Hypothetical protein                                                                                                                         |
| HH1842 | 1762709 | 1763782 | 358 | - | <i>gcp</i>  | Sialoglycoprotease Gcp                                                                                                                       |
| HH1843 | 1763848 | 1764957 | 370 | + |             | Conserved hypothetical protein, similar to <i>C. jejuni</i> CJ0949c                                                                          |
| HH1844 | 1765101 | 1765667 | 189 | - | <i>thiJ</i> | 4-methyl-5( $\beta$ -hydroxyethyl)-thiazole monophosphate synthesis protein ThiJ                                                             |
| HH1845 | 1765915 | 1767000 | 362 | + | <i>xerD</i> | Integrase/recombinase XerD                                                                                                                   |
| HH1846 | 1767013 | 1767567 | 185 | + |             | Conserved hypothetical protein, similar to <i>H. pylori</i> HP1580, predicted membrane-associated                                            |
| HH1847 | 1768331 | 1770376 | 682 | + | <i>frpB</i> | Iron-regulated outer membrane protein FrpB                                                                                                   |
| HH1848 | 1770458 | 1770955 | 166 | + | <i>ppa</i>  | Inorganic pyrophosphatase                                                                                                                    |
| HH1849 | 1770994 | 1772415 | 474 | + |             | Conserved hypothetical protein, possible pyruvate carboxylase A subunit                                                                      |
| HH1850 | 1772435 | 1773865 | 477 | + |             | Conserved hypothetical protein, similar to <i>H. pylori</i> HP1363                                                                           |
| HH1851 | 1773865 | 1774653 | 263 | + | <i>thiG</i> | Thiazol biosynthesis protein thiG                                                                                                            |
| HH1852 | 1774672 | 1775388 | 239 | + |             | Conserved hypothetical protein, similar to <i>C. jejuni</i> CJ0590                                                                           |
| HH1853 | 1775563 | 1776201 | 213 | + |             | Hypothetical protein                                                                                                                         |
| HH1854 | 1776268 | 1776990 | 241 | + |             | Hypothetical protein                                                                                                                         |
| HH1855 | 1776997 | 1777632 | 212 | + |             | Conserved hypothetical protein, similar to <i>E. coli</i> ECS2092, predicted secreted protein                                                |
| HH1856 | 1777650 | 1778864 | 405 | - |             | ABC transporter, ATP-binding component                                                                                                       |
| HH1857 | 1778867 | 1779553 | 229 | - |             | ABC transporter, ATP-binding component                                                                                                       |
| HH1858 | 1779574 | 1780866 | 431 | - |             | Conserved hypothetical protein, similar to <i>C. jejuni</i> CJ0606, predicted membrane-associated                                            |
| HH1859 | 1780866 | 1782374 | 503 | - |             | Conserved hypothetical protein, similar to <i>C. jejuni</i> CJ0364c, predicted outer membrane channel protein                                |
| HH1860 | 1782378 | 1782473 | 32  | - |             | Hypothetical protein                                                                                                                         |
| HH1861 | 1782509 | 1783930 | 474 | + |             | Conserved hypothetical protein, similar to <i>H. pylori</i> JHP0016                                                                          |
| HH1862 | 1783971 | 1784528 | 186 | + |             | Conserved hypothetical protein, similar to <i>H. pylori</i> HP1457                                                                           |
| HH1863 | 1784556 | 1785131 | 192 | + |             | Conserved hypothetical protein, similar to <i>H. pylori</i> HP1456, predicted lipoprotein                                                    |
| HH1864 | 1785166 | 1786077 | 304 | + |             | Hypothetical protein, predicted secreted protein                                                                                             |
| HH1865 | 1786086 | 1787474 | 463 | - | <i>murE</i> | UDP-N-acetylmuramyl tripeptide synthase                                                                                                      |
| HH1866 | 1787449 | 1788087 | 213 | - |             | Conserved hypothetical protein, similar to <i>H. pylori</i> HP1493                                                                           |
| HH1867 | 1788096 | 1788368 | 91  | - |             | Conserved hypothetical protein, similar to <i>H. pylori</i> HP1492, predicted NifU-like protein                                              |
| HH1868 | 1788566 | 1789564 | 333 | + |             | Putative C4-dicarboxylatebinding periplasmic protein                                                                                         |
| HH1869 | 1789585 | 1790199 | 205 | + |             | Conserved hypothetical protein, similar to <i>Wolinella succinogenes</i> putative small integral C4-dicarboxylate membrane transport protein |
| HH1870 | 1790213 | 1791484 | 424 | + |             | Conserved hypothetical protein, similar to <i>Wolinella succinogenes</i> putative large integral C4-dicarboxylate                            |

|        |         |         |     |   |                                                                                                   |
|--------|---------|---------|-----|---|---------------------------------------------------------------------------------------------------|
|        |         |         |     |   | membrane transport protein                                                                        |
| HH1871 | 1791499 | 1793085 | 529 | + | Phosphate permease                                                                                |
| HH1872 | 1793147 | 1794466 | 440 | + | Conserved hypothetical protein, similar to <i>H. pylori</i> HP1490, predicted membrane-associated |
| HH1873 | 1794461 | 1795480 | 340 | - | <i>hemE</i> Uroporphyrinogen decarboxylase                                                        |
| HH1874 | 1795498 | 1796520 | 341 | - | <i>asd</i> Aspartate-semialdehyde dehydrogenase                                                   |
| HH1875 | 1796869 | 1799037 | 723 | - | <i>cstA</i> Carbon starvation protein A homolog                                                   |
