# Supplementary material
Source: PubMed Central journal article supplement (PMC164685)
Supplement: pnas_1332093100_5.pdf [file pnas_1332093100_5.pdf]

```

560          *          580          *          600          *          620          *          640          *          660
HH0007 : -----KAGSE--KQNL SGISV-----EY--IAAYKQF E QD--FGLRYYANF YADASK-KASG-GD ITGNVMD YGVNVDAL Y FT : 110
HH0525 : -----GPAIPNS-MFPF SGIGM-----AVGLD VYKQV E SEN--YCHYYISY YNQSKSGKDNSPLF V NADINQEL I TANVD Y FT : 115
HH0661 : K L A M S M R F S S K T L L V V Y T S P V T F K G G L D A T T Y G G S V G N V M K A ---D L L L G V T L A S S Q I A L M H Y ---F E Q L S V E F V Y E R I Y S K G D K F A N F S N P K - F P T : 634
HH0812 : -----PDL-----S Y G L R C F P Q Y Y F P K - V C L R V V C A S K G N Y S E G E A N D G E -- T Y G F F R A C N V D F L Y C G C : 119
HH1304 : -----KAGSE--KQNL SGISV-----EY--IAAYKQF E P S--FGLRYYINP YADASG-KVKGTSE I KGNVMD YGVNVDAL Y FT : 114
HH1543 : -----PGL-----F G-----L A F T G G A K-----H H E L Y C K M P E----- : 173
HH1676/77 : -----V E N G A K D-----K A V S A G A S Y-----E Y--I A A Y K Q F E P S D--V G L R Y Y A N F Y A N F N D-E N P G---K T T L M N Y G V N V D A L Y F T : 171
HH1713 : -----I N P L D T D I--L N A I R T G G L E F G T K L S S D L S L A T G A Y Q-----A F F N G D G Q A T T G G T S V S Y G K L H C S A F I N L P F--- : 333
HH1729 : -----S F-----E Y--I V Y K S F T P A--F G M R Y Y I N F Y S N A E Q-K-N D L K P I---I M N Y G L N A D M L Y N V V : 55
HH1799 : -----I N A S G D T I S--K K D N G I T E-----A F--I A A Y K Q F E P N--F G L R Y Y I N F---N V N T-I G K D V G Q F R G T L M D Y G V N I D M L Y N P T : 85
HopA : -----Y S I A E E Q Y E E P Q T T T K E F--H N P R S V G L I N S Q S N N G A M N G V G V Q L Y K Q F E K N K F F G L R Y Y A F E Y N H---A Y I K S N F F S A S N V F T Y C A G S D L L Y F T : 380
AlpA : -----Q P R A-----G N S R S T N I L N G F V Q L Y K Q F E K K R N I G L R Y Y C F F Y N G---A S V G F R S T I N N V G L T Y G V G T D V L Y N F : 406
AlpB : -----N P A A-----G N S S Q V N A P N G F I R I Y K Q F E E N K N V G L R Y Y C F F Y N G---A G V G N G P T I N Q V N L L T Y G V G T D V L Y N F : 422
Baba : -----S E Q C L E T N Y L N Q N S Y N Q I Q T I N Q E L E--R N P R K V G I I N S Q T N N G A M N G L C I Q V Y K Q F E Q K R K W C A R Y Y C F F Y N H---A F I K S S F F S A S D V W T Y G F G A D A L Y N P T : 615
Saba : -----N A B A Q Q S N Y G I L P R Q Q N N Q A L A A M S--N N P R K V G M I S S Q N N G A L N G L G V Q V Y K Q F E S E S K R W C L R Y Y C F F Y N H---G Y I K S S F F S S S D I W T Y G G S D L L Y N P T : 514
HopH : -----I N T D L L I N W T N D K R A-----S Q K Y E R R V K C L S I F-----Y K D---M-----I G R T L D A Y N T : 189
HopZ : -----N N G S E L Q A V Y G V N Q S A Y Q L L S A T Q L E L--H N P R R V G L I S S Q T N N G A M N G L G V Q L Y K Q F E K R R R W C L R Y Y C F F Y N H---A Y I K S S F F S A S D V F T Y G V G T D V L Y N P T : 520

```

```

680          *          700          *          720          *          740          *          760          *
HH0007 : SG-DTSE-----G A R L E L C H G A N S T G G C T P K D D K-----M D K T G L N L A N V G E R-----T E I A K A H G I E L A A R V F T A R---T L Q K A D A G--- : 183
HH0525 : -NFTPAF-----G A R L E L C H G Y Q Q H D P T W K I A G N A M P T-----E A K G G L A M P V V G E F-----Y N F N D A S Q I L L G A K I L L I G---D Y K I T Q P W G S : 193
HH0661 : SGMVMQFSSQ G A M M S Z A D G M V A N G-D G W Q D---I A L R L G V T Y T Q K N L L L M F S A A R Q S P V E K L I P S N A Y M F G A G V R K T F S E Q N L---S V A Y S L S L K D E R K S : 738
HH0812 : S S E I N C V-----G V R V G A G E G I G E L A K L L D D T K G L P G-----H K Y N T S G F E M N L G L Q-----V I R D V H H Q P D F I V R W S M S L E R N F S T N T A Q G N : 201
HH1304 : T G E N T D E-----G A R L E L C H G A N S T G G C D F K D S K-----I D K T G L N L A N V G E R-----T E I A K A H G I E L A A R V F T A R---T L D E S E----- : 184
HH1543 : -----A N Y D E E F----- : 180
HH1676/77 : T S E S A N E-----G A R V V G V G S N T I D N D F S D I Q A A G I N-----L R K T G L D V S L L G E R-----S V V D T K H S L E A I A R V R E L V A M---T L F D G N V M G T C : 251
HH1713 : -----V N A N F T F A P O I-----Y Y G L S S E S E : 354
HH1729 : A S E S V N L-----G A R V V G V G A N T I A A K N N E D F K-----A K T G F M V A L A C G E R-----S Q F G K H H G I E V V A R V E F I D T---T L E N D R I N G--- : 127
HH1799 : A R P N A N L-----G F E L C A C A G A N T W G X D I G K D I A D S K N-----V K K T A F S A G L N F G E R-----S V F A K H Y G L E I A A R V E P T K I---T I F D G D N G G Q K : 164
HopA : N G G S-----D K N---R K W F E I F G C I A A G A T T M L N S Q F M N L K T T N S A S A K I N N T N F O L E N T G C P L-----Q Q I H H G V E L G V K I---I N T N Y Y S F M-G A K : 466
AlpA : S---R S Y---O N---R S V M C P F S L I O A G E T S Q S T L---R D D P N V K E H G K I N N T H F O L E F G C M R M N---E K I D C K S N R H N-Q H T V E F G V V V---I N T N Y Y K S A-G T T : 498
AlpB : S---R S F---G S---R S L A B F F G C I O A G D T I S T L---R N S P---O A N R P T A T K F O L E F V G C M R M N---F I L L K D L K S H N-Q H S I E I G V O I---I N T N Y Y K A G-G A S : 512
Baba : N D K A T N E L G K N---N K L F V L P G C I A A G T S M L N S E Y V N L A T V N N V N A K M N V A N F O L E N M G V R M N---L R S K K G S D H A A Q H G I E L G L K E---I N T N Y Y S F M-G A S : 716
Saba : N D S I T R---K N---N K L F V L P G C I A A G T S M L N S Q V V N L A T F N N P S A K M N A T N F O L E N L G F P T I---L T A R K K D S E H S A Q H G I E L G I K E---I N T N Y Y S F L-G T C : 612
HopH : K K A S R H V F R K S---S---C L V I C M E I G G S T W F A S N N L-----T P N Q V K S R T I F O C F G V R M N---E Y I D R Y G D E I Y L G S S V S L G V K V---A F K V N N Y S D D Y G D K : 284
HopZ : N D R A T---K N---N K L F S V P G C I A A G T S M L N S Q V V N L A T F N N P S A K M N V A N F O L E N L G C L R M N---L A K N K K A S D H V A Q H G V E L G V K I---I N T N Y Y S L L-G T : 617

```

```

780          *
HH0007 : E K V T A S H--T V N G V R T F S----- : 202
HH0525 : V K A N T L R--T V I V Q G M N P T----- : 212
HH0661 : I Y Q I G G F G L E L L S A S L G Y Q----- : 759
HH0812 : H T I S S H R N N S S N T A Y T Y V----- : 222
HH1304 : E K V T A S H--T V N G V R T F S----- : 203
HH1543 : -----Y W K S P M L A C H A Y Q Y T----- : 196
HH1676/77 : V K L T A S R--N N N G V R Y T Y S----- : 270
HH1713 : V A N A Q Y K R I G V V A A T R F R W D----- : 375
HH1729 : A K Q T G S H--I N N V G A R Y L L S----- : 146
HH1799 : I K M T G S Y--D N N V E L R Y I F N----- : 183
HopA : L A---Y R L Y S W Y E N N V L A----- : 483
AlpA : V K---Y F P S W Y M S M G S----- : 515
AlpB : V K---Y F P S W Y W Y C Y A----- : 529
Baba : L K---Y R L Y S W Y L N V V E A----- : 733
Saba : L Q---Y R L Y S W Y L N V V E A----- : 629
HopH : L D---Y K V V S W Y L N V V E A----- : 305
HopZ : L Q---Y R L Y S W Y L N V V E A----- : 634

```
