# Supplementary material
Source: PubMed Central journal article supplement (PMC164685)
Supplement: pnas_1332093100_6.pdf [file pnas_1332093100_6.pdf]

**Table 3. Observed and predicted phase variable genes in *Helicobacter hepaticus***

**Length variation observed in shotgun sequencing**

| Gene(s) affected | Polymorphism | No. of clones @repeat length | Length of ORF for different repeat lengths | Putative function                                                                                      |
|------------------|--------------|------------------------------|--------------------------------------------|--------------------------------------------------------------------------------------------------------|
| HH66/HH67        | G(10-11)     | 3@10, 1@11                   | G(10):157,<br>G(11):410                    | Conserved hypothetical protein, similar to sugar transferase                                           |
| HH69/HH70        | G(11-12)     | 2@11, 1@12                   | G(11):146,<br>G(12):150,<br>G(13):299      | $\alpha$ -1,2-fucosyltransferase                                                                       |
| HH90             | G(9-11)      | 1@9, 9@11                    | G(9):454,<br>G(11):452,                    | Conserved hypothetical protein, similar to <i>Haemophilus influenzae</i> O-succinylbenzoate-CoA ligase |
| HH96             | G(9-10)      | 1@9, 9@10                    | G(9):134,<br>G(10):136                     | Conserved hypothetical protein                                                                         |
| HH205            | G(12-14)     | 2@12, 3@13,<br>2@14          | G(12):374,<br>G(13):376,<br>G(14):403      | Conserved hypothetical glycosyl transferase                                                            |
| HH329/<br>HH330  | G(12-13)     | 1@12, 1@13                   | G(12):103,<br>G(13):282                    | Hypothetical protein                                                                                   |
| HH456            | C(13-15)     | 1@13, 2@15                   | C(13):232,<br>C(15):237                    | Chemotaxis protein methylesterase CheB                                                                 |
| HH540            | G(10-11)     | 1@10, 3@11                   | G(10):110,<br>G(11):256,                   | Hypothetical protein                                                                                   |
| HH584            | G(10-11)     | 2@10, 6@11                   | G(10):167,<br>G(11):157                    | Hypothetical protein                                                                                   |
| HH763            | C(8-9)       | 13@8, 4@9                    | C(8):269,<br>C(9):521                      | Hypothetical protein                                                                                   |
| HH1165           | C(13-16)     | 2@13, 4@16                   | C(16):823,<br>C(15):332,<br>C(13):822      | Conserved hypothetical protein, similar to <i>Helicobacter pylori</i> HP0022                           |

|                   |          |                     |                                                  |                                                                                                                         |
|-------------------|----------|---------------------|--------------------------------------------------|-------------------------------------------------------------------------------------------------------------------------|
| HH1300            | C(11-12) | 3@11, 3@12          | C(11):40,<br>C(12):37                            | Hypothetical protein                                                                                                    |
| HH1425            | C(10-11) | 1@10, 5@11          | C(10):233,<br>C(11):526                          | Hypothetical protein                                                                                                    |
| HH1426            | G(10-13) | 10@10, 2@13         | G(13):281,<br>G(12):162,<br>G(10):280            | Conserved hypothetical protein,<br>possible methyltransferase                                                           |
| HH1428            | C(10-12) | 2@10, 3@11,<br>1@12 | C(12):110,<br>C(11):530,<br>C(10):115            | Hypothetical protein                                                                                                    |
| HH1499            | G(10-11) | 3@10, 3@11          | G(10):145,<br>G(11):730                          | Conserved hypothetical protein,<br>similar to <i>Campylobacter jejuni</i> putative<br>integral membrane protein CJ1055c |
| HH1676/<br>HH1677 | G(16-20) | 1@16, 3@19,<br>1@20 | G(16):43,<br>G(18):270,<br>G(19):44,<br>G(20):57 | Conserved hypothetical protein,<br>similar to <i>H. pylori</i> putative outer<br>membrane protein HP0117                |

### Phase variation predicted

| Gene(s) affected | Length in all shotgun clones | Effect               | Putative function                                                                                                   |
|------------------|------------------------------|----------------------|---------------------------------------------------------------------------------------------------------------------|
| HH72             | C(10)                        | C(10):320, C(9):319  | Conserved hypothetical protein, predicted fucosyltransferase                                                        |
| HH73             | G(9)                         | G(9):362, G(10):197  | Conserved hypothetical protein, predicted glycosyltransferase                                                       |
| HH75             | G(10)                        | G(10):241, G(9):205  | Aspartate racemase                                                                                                  |
| HH76             | G(11)                        | G(11):271, G(10):198 | Conserved hypothetical protein, similar to <i>Salmonella typhi</i> putative methyltransferase                       |
| HH79             | G(9)                         | G(9):489, G(10):350  | Hypothetical protein                                                                                                |
| HH83             | G(12)                        | G(12):244, G(11):139 | Conserved hypothetical protein                                                                                      |
| HH85/HH86        | G(13)                        | G(13):104, G(12):137 | Conserved hypothetical protein fragment, similar to <i>C. jejuni</i> CJ1301                                         |
| HH89             | G(13)                        | G(13):320, G(14):275 | Conserved hypothetical protein                                                                                      |
| HH91             | G(10)                        | G(10):503, G(9):442  | Hypothetical protein                                                                                                |
| HH95             | G(10)                        | G(10):187, G(9):151  | Conserved hypothetical protein, similar to <i>C. jejuni</i> putative acetyl transferase                             |
| HH99             | G(12)                        | G(12):343, G(11):370 | dTDP-D-glucose 4,6-dehydratase                                                                                      |
| HH181/<br>HH182  | G(11)                        | G(11):78, G(10):265  | Hypothetical protein                                                                                                |
| HH192            | G(10)                        | G(10):41, G(11):14   | Hypothetical protein                                                                                                |
| HH207            | G(12)                        | G(12):272, G(13):9   | Conserved hypothetical protein, similar to <i>Klebsiella pneumoniae</i> RFBC protein                                |
| HH323            | G(10)                        | G(10):239, G(11):245 | Conserved hypothetical protein, similar to <i>H. pylori</i> putative lipopolysaccharide biosynthesis protein HP0805 |

|                   |       |                      |                                                                                                                      |
|-------------------|-------|----------------------|----------------------------------------------------------------------------------------------------------------------|
| HH379             | G(9)  | G(9):524, G(10):319  | Anaerobic C4-dicarboxylate transporter DcuA                                                                          |
| HH503/<br>HH504   | G(12) | G(12):41, G(13):142  | Hypothetical protein                                                                                                 |
| HH648             | G(10) | G(10):337, G(11):134 | Conserved hypothetical protein, similar to <i>Dichelobacter nodosus</i> lipopolysaccharide biosynthesis protein LpsA |
| HH811             | G(9)  | G(9):465, G(10):73   | Conserved hypothetical protein, similar to <i>H. pylori</i> HP0497, putative sodium-dependent transporter            |
| HH957             | C(13) | C(13):129, C(12):142 | Conserved hypothetical protein, similar to <i>H. pylori</i> replication protein A                                    |
| HH967             | G(10) | G(10):573, G(11):13  | Hypothetical protein                                                                                                 |
| HH980             | C(10) | C(10):252, C(9):99   | Conserved hypothetical protein, predicted glycosyl transferase                                                       |
| HH981             | C(9)  | C(9):354, C(8):194   | Conserved hypothetical protein, glucosyl transferase                                                                 |
| HH1047            | C(12) | C(12):44, C(11):37   | Hypothetical protein                                                                                                 |
| HH1058            | T(14) | T(14):41, T(15):25   | Hypothetical protein, predicted membrane-associated                                                                  |
| HH1089            | A(14) | A(14):35, A(15):18   | Hypothetical protein                                                                                                 |
| HH1129/<br>HH1130 | G(11) | G(11):101, G(10):580 | Alginate O- acetylation protein                                                                                      |
| HH1188            | G(9)  | G(9):415, G(10):68   | Hypothetical protein                                                                                                 |
| HH1631            | G(9)  | G(9):416, G(10):69   | Predicted amino-acid transport protein                                                                               |
| HH1672            | C(11) | C(11):430, C(10):58  | Conserved hypothetical protein, similar to <i>H. pylori</i> HP0580, predicted membrane-associated                    |
| HH1794            | G(9)  | G(9):100, G(10):194  | Hypothetical protein                                                                                                 |

|                   |       |                      |                                                                        |
|-------------------|-------|----------------------|------------------------------------------------------------------------|
| HH1776            | G(10) | G(10):459, G(9):324  | $\alpha$ -1,3-fucosyltransferase                                       |
| HH1822/<br>HH1823 | C(11) | C(11):107, C(10):313 | Conserved hypothetical protein, similar to<br><i>C. jejuni</i> CJ1429c |
