# Supplementary material
Source: PubMed Central journal article supplement (PMC164685)
Supplement: pnas_1332093100_9.pdf [file pnas_1332093100_9.pdf]

HH275 : MFCGIL-----LCK-----SINQTSIHSTNVVTFKGGEAATPSPWEMFKKQIFLQIMFVFLNPAKIVTIIEDFYYAAQTGGLASV-FVDVF : 88  
 VirD4 : M-----MMF-----NSKTPQR-----LAIVCSIAAGFCASLYVTFHGFNGEA : 40  
 TraG : MNEVYVIAKWLNNLNALAAFMGTWWDSEIKRIALILSVLAVA--VMVQRHNVMIDL---GWAVVVISLWVNTSQQIINDSLVVFVVDVF : 95  
 HP524 : M-----DFLYNT-----LYFEDYKLVVFSFGLIILFFYKFIKAAQKAEKDKANQPKK-K-SFKIL : 59

HH275 : VILAFGASLTSIFGKGLVQTVDSAGSIFOGARPSDIFENFQOLREDAKPKAKTKKFKVYFIFVVKCALYQHSAAIATAEVGKTSIQNIN : 188  
 VirD4 : ---MMF-----SVFAFWYE-----PLYMGHATVVF-----Y-----CGI-----AVVSTSIIVLLS : 81  
 TraG : VGLAMPPLSLTRIGHAMVASYEMIFQDPSVYTSKYTM---FANLIVKST-DPLSRPPIIIFLDYVINCVL : 166  
 HP524 : IIDSLKERVK-TFGFWLQAILLSYSFTISGLF---FILLNFYDCNRS E---SDDLFL : 114

HH275 : IWOVLEATLY-VNGSCEYYDKMMAFENIEVWENIILAMLNPAATAAPALNMANAMVAAPNVSA GDNMNPVQKLRASEIDVNAVYADS : 287  
 VirD4 : ---GI-----IISRNH HHSTA-----LWA-----FGEMR-----HAGYLORV-----NFKI-EIEFKT : 124  
 TraG : ---GDIY NHKKT-----LEDLMSASAPVITL-----IFSRP : 194  
 HP524 : IIV-----IYAIQDP---IYY---FALAFSSLK---IVGENISLVVYGSILCS---VIFITLFPVW : 163

HH275 : LGIKAYGQYVQVVKDARAKLTDISSVSEFIFSLVSPQALFLALVAAF---FMLAIAIIGYPSGLKVLYYVGSLSFSLVMSCLALTH : 380  
 VirD4 : CGP---WFGSYLT-NGEY-----FHSL-----VVAPFRAGKGVGVVPIELTLKGSVIALVVK--- : 174  
 TraG : SPLVVDNMMNHIICKSDASVTIKD-----LNLETITGKKTWYIYQQIFGGRIDILLFRLLVSDSYS---YFVSSQSASIMQNVIMNAIKE : 283  
 HP524 : ---ILKYLIT-RT---RDTGANK---DDLFGS---ASWETE---AMI IAK : 199

HH275 : ELIIEYISRNAAETIHGMTAGAINMNVH---GTAYEY---MAYQSIASTIAA---AIFLIPIVVAATQAKLAAALQASAAAPMCGIESSGAMMAKAND : 476  
 VirD4 : ---GELFELTSRARKAG---GDAVKEF---SPLDPRRTHC-----YNPVLDAAALEP---RFFETERRLAANLITAKG : 237  
 TraG : SITNAAARNGDIASVSLAITSSEMEKRIAHVSIHVIMNLPMVQIILTGIAIPI---PLLILAAVFNKLTISVL : 357  
 HP524 : -LITPNKKRARDK-REVIVGRRGLGFLAYAGQAFIGL---IA-----PTRSGKLVGIMPNNMNPQNIIV---FDPKADIMETGK : 275

HH275 : ANNRDLETVSRGIVSASVMKGIENNAIAALHKMDNYNEFNAGVAQOMQIGSTAGYKEMTFRAGADGFARVSDGGFQGVQSAATAKLEAYTDIE : 576  
 VirD4 : KGARCFIDCARDVFAIGLIGIEGTPFAGAV---YDLFA---LPEKYLFAHLAEESRNK---EAQRIFENMAG---NDIK : 308  
 TraG : ---KGYVFALMVAQWELLVAILSAMFYAKNCAVVLSELSIQLKYNLASTAGYLSAMI-----BELSMMVSLAAGFS--S : 435  
 HP524 : IREKRFN-----KQVFIYEPPS---KTHRFNPFAMV-DFGNDVVL---TEDILSOLDTRLGEMVAS---GDPS-TO : 339

HH275 : DFRIRTCISGNALARGLNDSAVKTIASARGLMSGLFYREGELSGREGSEFYAGLEINATAAANQARGVGLGETTREIMNAVQV-GAEAQVNLQIAQ : 675  
 VirD4 : ILTSYTSVLCDG-GLNLWADPLVKAATS---RSEF-----SVID-----LRKRTCVYLCVSPNDELVWAP : 365  
 TraG : VYSHFASSSISETASAGSVVDENYSYNNMQTENVNGFSWSTSTTFGQMYQIG-----SGATATITRDGMMMDASGMSRLEV : 517  
 HP524 : IF-----GLA---KLVFERPNEKDFPFSQAALNLFINCNIRLMLWK-----KGLFVVRKKIIMPVTPMFFLGMASGLNLDE : 415

HH275 : GRSLEQVTFGAGGFQSPFDAMAE TSAIQNTIARETAASARLNFNGISGGKGEISFSSITKSNADLRHDSITIGTKGYGGVGFDAANGSDKVVQRAE : 775  
 VirD4 : LMRLL---LQVQVVISLRSPLGKDERHVLFL---DEFKHLGKLBALPATAITIAGYKGRFM-FIIQSASALTG-----LYDDAGKQNLNSNG : 448  
 TraG : GINATV---IAAAQEMAREASNRA SALHGFSSTIASAWNLISQFGSNRG--SDSVTGCADSTMSAQDSMMASRMRSAYE---SYAK : 599  
 HP524 : DTNMEV---VSLMFFGGEEKSGNLRVLSPATR-NNWVSKFTMGAR---IYSSVQGVYTSAFAPYNNAMRNFTSANDFD-----RRL-R : 498

HH275 : ICTYAQGMVQSQTEKIQGQIKDSFNIFNATESTFDKKAELINKSHSQALKQVYDGSSSMGAATGIGNEVISGEEA--KSHTHLAAVRAAQ-SVW : 874  
 VirD4 : VQVF-MATADDEPTPIYSKAGDY---FKARSTYSQAR---MFDHNI-----ISDQCAPLRE---QVRELQNN : 511  
 TraG : ANNSNEQATRELASSTNASLGLYDAVAKGH---LGISVLGNGGGVGLCAGAKASIDGSLDLSLEASSGSRASHPARLIDARATDFKEASYVT : 694  
 HP524 : IDEVSIQVIANPKESIIVGILELFFNVN-----IY-----SNLILPHDQC-RSCLEMLMDFTLG--GNL : 558

HH275 : NNAMNALNDGLKSS-IMFQVSTMASAGVMNYSMSANVQGAASGMMSNQIVTITGOSMIADSIMRHNTLALGDFGNNSNLTILTQSLREAMSV : 973  
 VirD4 : ---NFI-VLKGHPPLKLRKVRVYSR---MLRR---FNCQIGALPEPASLM---LSEGVARDGDDLSQAAVTEAQLGRL : 581  
 TraG : SRKVSSESHTDNDASRDCLSAALNSAKQSYDYTTNTRSEYAEEMAS---RTESMSGMSESLSQFAQVVMKAPQ--- : 772  
 HP524 : ETFVAV---IMLE---YN---MRPAFVFSKAQ---LENPPLGYCRGAKIILDLSLNM----- : 609

HH275 : GIASIASASSPAARALFAALTRSTLSTLNGRSEFNLAATDGGYVGSFDSLSLNVGGYVNDMGS--VSAATGYGIGVSGMRAIGMANVGMFSISITV : 1071  
 VirD4 : D---SIPNN-----MEAATPQNSEMODEQDSLPTQID--- : 622  
 TraG : DVEALLNNTSSBIALARRAMAWSVQF---OVQPVNDNTWESRRVIGKGMESVPSGGGSIDIIADHQEQAILTEQRT---QDSNIRNVK : 858  
 HP524 : ---YYGIN-----NDNYVEHFKLSVVLGKYTRQDVS---SIDNTGKINTSINRKERFLMTPDELMTMGEL : 672

HH275 : SNVGMFAPAGGAKLGNITGLINPMSMAQGVGFKFAMREKKSIGE--NATSMGIVGKDNVRNEI-----MGNQTH--- : 1142  
 VirD4 : EDAGGVVDFGVSAMAP-AMIAQQLLEQIH---ALQQV---GPFSSVSKLK--- : 670  
 TraG : HQVDNMTVEYRGNIGDTQNSIRGEINIVKGOY---SELONHKTEATQNKYNEKLAQERIFGDSFELIEKAKSYQHK--- : 938  
 HP524 : IIE-----ENTKPIKCHKALYYDPPFTDBLIVSPSLSKYKLGKVNATFYDQLQAATRCELSYDSDVPCVGSSELWWW : 752
