# Supplementary material
Source: PubMed Central journal article supplement (PMC164685)
Supplement: pnas_1332093100_10.pdf [file pnas_1332093100_10.pdf]

\* 20 \* 40 \* 60 \* 80 \*  
 HH260 : M T S Y S L S L I Y V N N F A S S G G S G P V F H I G L A S K V C R L Q I M K E Q L E K L S S Y S N N G L S F F N I Q E : 70  
 VirB4 : M L G A S G T T E S L L L N A A D H V S I Y A G E V Y I P Y V G H V S D : 24  
 HP544 : M F V A S K Q A D E Q K L V I L G S V Q S S F K I I L K A L M O G V N P F F V L F D G G N R L F F F T F I Y S S I F I L E V T I V L S : 75

\* 100 \* 120 \* 140 \* 160 \* 180  
 HH260 : S I K Y E Q D I R Q M C F I N E E T L D L K E S E K Y Q Y N F T S H A F K A W S D T L L N D N K D F D K N L R E T F : 135  
 VirB4 : H I V L L E L G S I M T M A H V S G M A F E L L D A E M N A C R A F N T L L N A A D H V S I Y A L V R H D D V F P S P A R H R S A F S A S I : 100  
 HP544 : V I L F Q A Y E P V L I V A I V I V I V A L G F K K Y R L Y Q R M E L A M K F K K E F L F Y G K K A F M S L F S M K P S M M A N D I H L N P N R E D R I L V S A A N S Y L : 163

\* 200 \* 220 \* 240 \* 260 \*  
 HH260 : N N D F T F I R Q C Y A D I T E F F E W L E H I G S I A D N I D T Q E K L F N E F V S P Y S N I F S I E G F F G F : 198  
 VirB4 : S C A F E R V L S K L R N D H F L T L I V S P A A L G K V R R E T V S P A A L G K V R R E T K R Y : 141  
 HP544 : A N N Y C F I D D V I L T N N Y S L L T I K L G I D E L T S R L I E H A S I Y S V F R N F V T E F E F Y F S T V K K I V I D E T R D Y S L I F S N F M R A Y : 253

\* 280 \* 300 \* 320 \* 340 \* 360  
 HH260 : G P Y T C L F K N Y K I G N F Q T G K V F Q N N W N D D F E T E V Q V D K L K E E K D K P L E R I P L N S D D K Q Y F Y S : 266  
 VirB4 : R Q Q N D L T A Q T R N L R D L W L V A G A L A V K L R L S E F E Q V L T E V G A R L I M T R F T P V P V V G S L G A S I Y T : 215  
 HP544 : N E K R S F Y I S F Y L T I E Q D L L Q T I N E P V M K K F A D N N F E Q G I K A V L N K D R I L L E L L S K Y H P I R I K E Y T K D G V I Y S : 338

\* 380 \* 400 \* 420 \* 440 \*  
 HH260 : K D F I L L D E P L K T F Q E Y S E V M S K S E S O Y K K I C K S I L F T I L T S D : 311  
 VirB4 : D V I C G A R G L E I R T P K D S Y V G S I Y S F R E Y P A T T R P G M L V L S L D F P I V L T Q S F S : 270  
 HP544 : K C C E Y N F L V G M N A F I C N R D L Y L E K M H G G V K E V Y P A K C K I L N D D S C Y Y F S A T E I S Y A P K S Q S D L F K N A L D S E F I F M A Y S : 428

\* 460 \* 480 \* 500 \* 520 \* 540  
 HH260 : K I R E N P K I F G D K R N V F K N Y K V V G N S C V D F V M K : 344  
 VirB4 : F L T R S Q A S S L S K S S Q M L S S G D K A V T I S K L S E A E A L A S N F V L C A H V S L C I Y A N D L M N L A D R G A R A R T R L A D A V V V Q E G I G M A : 360  
 HP544 : P K N S Q V L F D L A F T S R R I I S G S K E G M T L G C L S L V G N G I T L C S Y G N S L V L F A D S F E K M K Q S V K E C V S S A N A K F L A N A A T F S M N : 517

\* 560 \* 580 \* 600 \* 620 \*  
 HH260 : L R I C A S K P H K A T A I P Y D I I N H I Q M I N N Y N N Q K G T Y K K P L S K G D K : 392  
 VirB4 : A Y W S Q L P C N Y K V R T R P G A T S E N F A G L V S F E N P E C G S G S H W C N A A R F T T R G G T E D Y I L H E H D V G M T A I F G P I C R G T : 440  
 HP544 : Y F R A K H C S I I L P F I F D V T S N N F A D F I A M P A M S F D G N Q E N N A W G N S V M L S E I N S F Y L N F M T D F G S A S A G H T L I L G S T G S A T : 604

\* 640 \* 660 \* 680 \* 700 \* 720  
 HH260 : I S F L I Y D F E L Y Q N Y S T L C N I D S I W A C E E G K S F N Q Y C B F L L H S N I L H T I R I N R L T D N I I N N Q L K S L : 459  
 VirB4 : T L M F I L A M L E Q S M V D R A G A V V L F D K D R G S E L L R A T G C T Y L A L R R C A P S G I A P L R G L E N T A A S H D F L R E W : 511  
 HP544 : V F M S M T L N A M Q G F V H N F P A N V S D C Q E L T M V Y M D K D Y G A Y G N I V A M G C E Y V K I E L C T D T G L N F A A A C V Q M I A T M E Q K Q T A I S V V E L : 694

\* 740 \* 760 \* 780 \* 800 \*  
 HH260 : A N T E I I Q I E D D V M F I N T H F C L A S Y F Q R L K Y P P L Q T E V A L I I V D E K E : 510  
 VirB4 : I V A L I S S G R G C I S P E E N R R L V R G I H Q L S F P M S I A G E R F L L N G P A F C A G A I Q R W C G G N A L G W A F D G E L D E V : 588  
 HP544 : V K N L A T S D K E N G N S I S F S L A D S N T L A A A V T L L T G M L Y P I T Q L I A F G D N D P M C L V A L A P F C N S T N E F Q W L F D N K A T D L : 784

\* 820 \* 840 \* 860 \* 880 \* 900  
 HH260 : F Y L K A S Q S K F A F S E S Y D S N M P S S I A L W Y C P I L F A E N S Y P L A I H : 557  
 VirB4 : K L D P S I T F D M T L L E Y E V C A A A A A L L H B I G A M V D G S F V M S C D E F R A X I L N R F A A V V D K F L T V R X N G M I L A T Q P E H V L E S Q : 677  
 HP544 : D F S K T I I C V D G S S F L D N D V S P F I C F V L F A R I Q E A M D G S F V L L I D F A W K Y L G D P V A Y F V R D M K T A P K R N A I V R L A T S I U D L L A C P : 873

\* 920 \* 940 \* 960 \* 980 \*  
 HH260 : I Q E N I F N Y P Y F A Q C I V G N K K D Y G Y N F L K Q E E V S N A P I L : 600  
 VirB4 : L G A S I V A C M T I Y P S P T A D R S A Y I D G L K T E K F A I R E D M A V G S R F L L B S G S V V C E F D E M S E Y A V L S E A N T V G F A D I L : 765  
 HP544 : I A D T R E C P T I L R N D G N L S D Y Q R L A N V T E K E F I I T K G L D R I I Y G C G S S V I A S E N E R G I P K Y I K I L S T D T V E V K I I : 957

\* 1000 \*  
 HH260 : A N W I K N W Q P T A K : 613  
 VirB4 : R X V N G D N P S A M S E F M A R W H E A Y T : 789  
 HP544 : D K I I N H S I I D K Y Q A L R Q M Q O I K E Y : 983
