# Supplementary material
Source: PubMed Central journal article supplement (PMC164685)
Supplement: pnas_1332093100_11.pdf [file pnas_1332093100_11.pdf]

**Table 4. Properties of *Helicobacter hepaticus* strains**

| Strain name | Country of isolation | Mouse strain, age, sex                                                    | Origin of sample | Pathology                                                                         | Presence of complete HHG11 island |
|-------------|----------------------|---------------------------------------------------------------------------|------------------|-----------------------------------------------------------------------------------|-----------------------------------|
| ATCC 51449  | U.S.                 | SCID/NCR, NIH, young male                                                 | Liver            | Multifocal hepatitis                                                              | +                                 |
| ATCC 51448  | U.S.                 | SCID/NCR, NIH, young male                                                 | Liver            | Multifocal hepatitis                                                              | +                                 |
| ATCC 51450  | U.S.                 | SCID/NCR, NIH, young male                                                 | Liver            | Multifocal hepatitis                                                              | +                                 |
| 94-739      | U.S.                 | SCID/NCR, NIH, male, 7 months                                             | N.A.             | Visible multifocal lesions on liver, multifocal hepatic necrosis and inflammation | +                                 |
| 95-225      | U.S.                 | Swiss mouse, NIH, male, retired breeder                                   | Cecum            | No visible lesions                                                                | +                                 |
| 95-557      | U.S.                 | A/J, born at MIT, male, 3 months                                          | Cecum            | Multifocal hepatitis                                                              | +                                 |
| 94-2114     | U.S.                 | DB A/2, Jackson Lab., female, 4 weeks                                     | Cecum            | No visible lesions on liver, cecum and colon                                      | -                                 |
| 94-2423     | U.S.                 | C57BL, Jackson Lab., female, 4 weeks                                      | Cecum            | No visible lesions on liver, cecum and colon                                      | -                                 |
| 95-1552     | U.S.                 | N.A.                                                                      | N.A.             | N.A.                                                                              | -                                 |
| 94-2138     | U.S.                 | Nude mouse, Swiss background, Beth Israel Hospital Boston, female, 1 year | Cecum            | Moderate typhlitis                                                                | -                                 |
| 94-508      | U.S.                 | N.A., Harvard Medical School, male, 2 years                               | Cecum            | No visible lesion                                                                 | -                                 |
| 96-284      | Germany              | N.A.                                                                      | N.A.             | N.A.                                                                              | -                                 |
| 96-1809     | The Netherlands      | N.A.                                                                      | N.A.             | N.A.                                                                              | -                                 |

N.A., data not available; NIH, National Institutes of Health; MIT, Massachusetts Institute of Technology
