# Supplementary material
Source: PubMed Central journal article supplement (PMC164685)

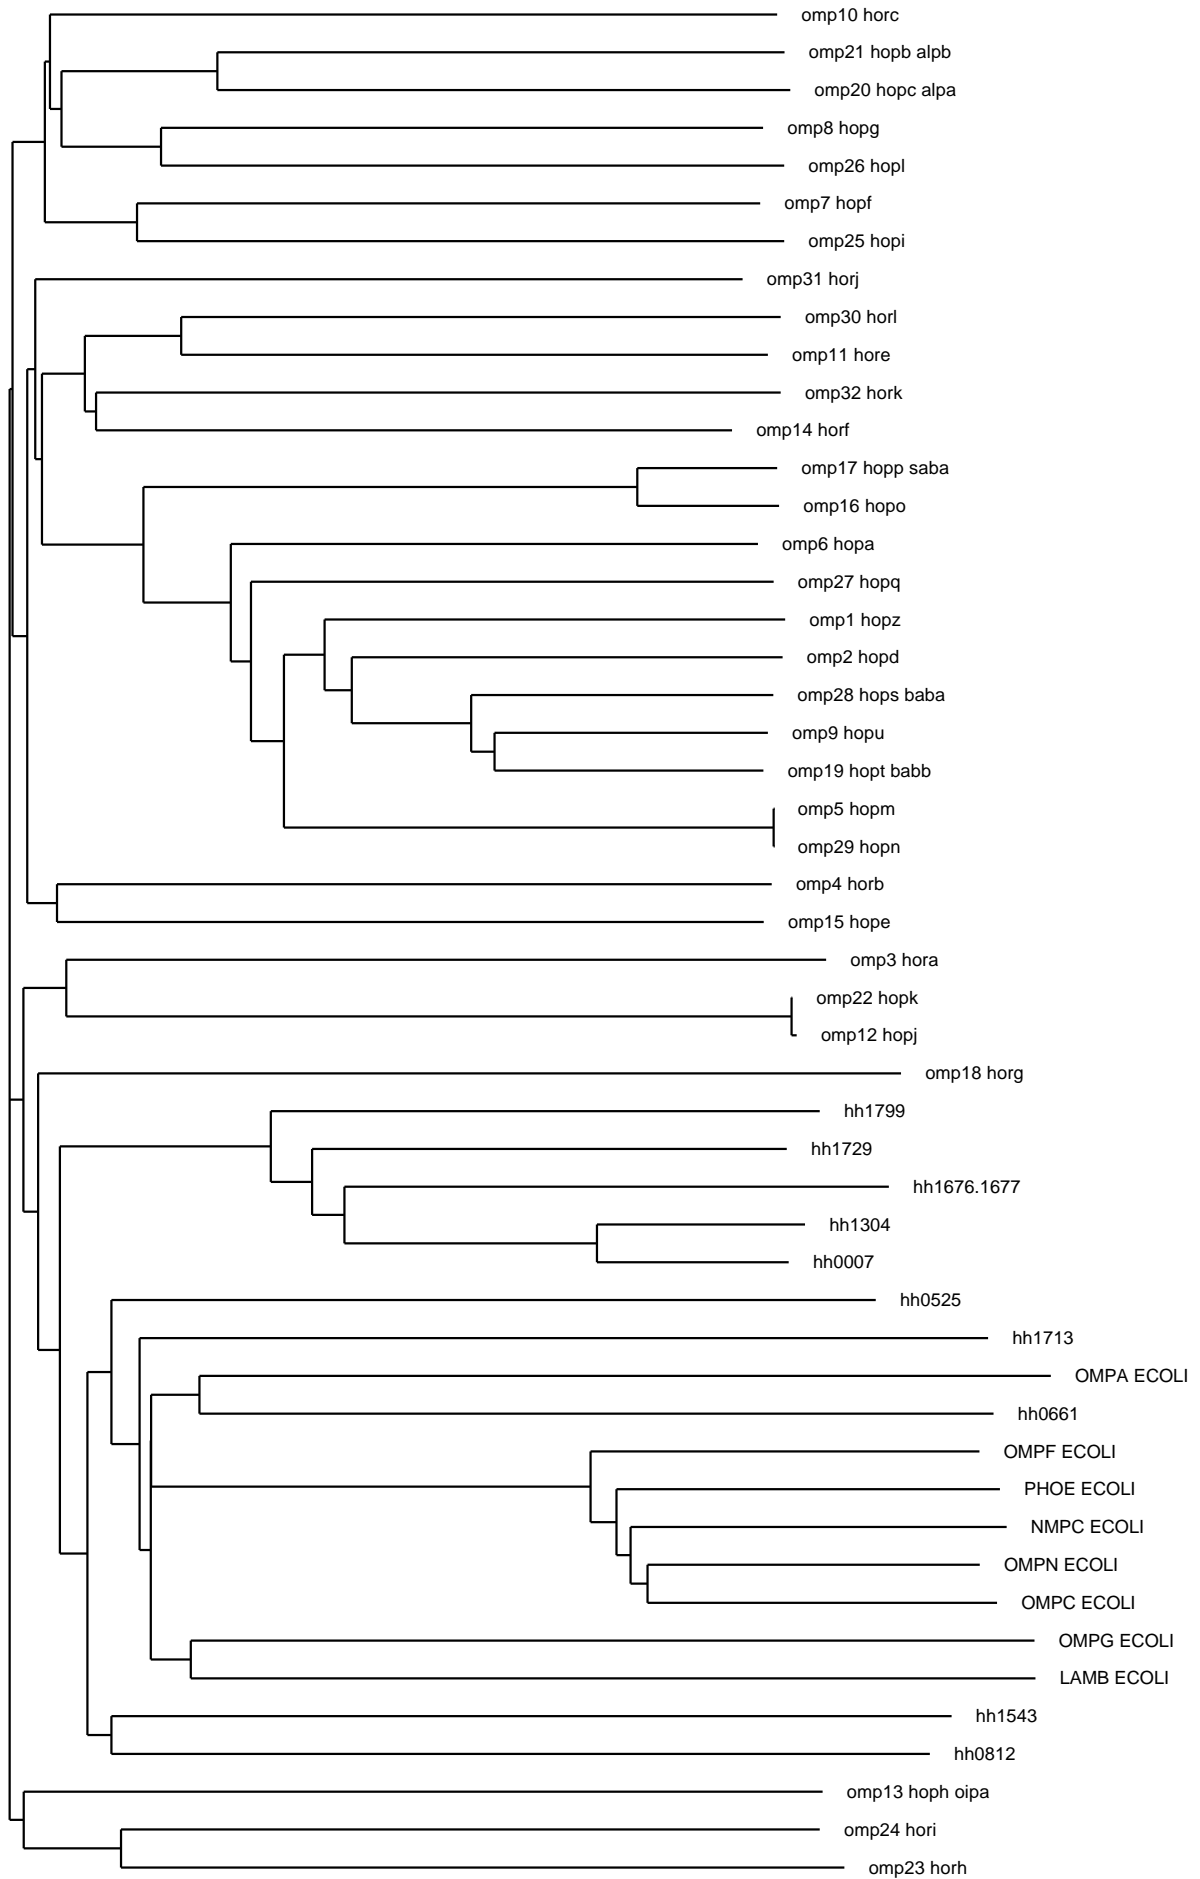

0.1

Supplement: pnas_1332093100_4.pdf [file pnas_1332093100_4.pdf]
